# Supplementary material for: Cassava brown streak virus has a rapidly evolving genome: implications for virus speciation, variability, diagnosis and host resistance
Source: PubMed Central journal article supplement (PMC5093738; doi:10.1038/srep36164), 2016-11-03
Supplement: srep36164-s1.pdf [file srep36164-s1.pdf]

Supplemental Figures 1 and 2

***Cassava brown streak virus* has a rapidly evolving genome: implications for virus speciation, variability, diagnosis and host resistance**

Titus Alicai, Joseph Ndunguru, Peter Sseruwagi, Fred Tairo, Geoffrey Okao-Okuja, Resty Nanvubya, Lilliane Kiiza, Laura Kubatko, Monica A. Kehoe and Laura M. Boykin

Supplemental Figure 1. CBSV Amino Acid variability obtained using datamonkey.org. Once files are uploaded to the site, the images below are obtained from the "Information from upload" tab and the pdf is downloaded.

| 5                                                                                                                                                                                                                                                                                                                                                                                                                                                                                                                                                                                                                                                                                                                                                                                                                                                                                                                                                                                                                                                                                                                                                                                                                                                                                                                                                                                                                                                                          | 10                                                                                                                                                                                                                                                                                                                                                                                                                                                                                                                                                                                                                                                                                                                                                                                                                                                                                                                                                                                                                                                                                                                                                                                                                                                                                                                                                                                                                                                                                                                                                                                                                                                                                                                                                                                                                                                                                                                                                                                                                                                                                            | 15                                                                                                                                                                                                                                                                                                                                                                                                                                                                                                                                                                                                                                                                                                                                                                                                                                                                                                                                                                                                                                                                                                                                                                                                                                                                                                                                                                                                                                                                                                                                                                                                                                                                                                                                                                                                                                                                                                                    | 20                                                                                                                                                                                                                                                                                                                                                                                                                                                                                                                                                                                                                                                                                                                                                                                                                                                                                                                                                                                                                                                                                                                                                                                                                                                                                                                                                                                                                                                                                                                                                                                                                                                                                                                                                                                                                                                                                  | 25                                                                                                                                                                                                                                                                                                                                                                                                                                                                                                                                                                                                                                                                                                                                                                                                                                                                                                                                                                                                                                                                                                                                                                                                                                                                                                                                                                                                                                                                                                                                                                                                                                                                                                                                                                                                                                                                                                       | 30                                                                                                                                                                                                                                                                                                                                                                                                                                                                                                                                                                                                                                                                                                                                                                                                                                                                                                                                                                                                                                                                                                                                                                                                                                                                                                                                                                                                                                                                                                                                                                                                                                                                                                                                                                                                                                                                                                                                                                                                                                                                                                                                         | 35                                                                                                                                                                                                                                                                                                                                                                                                                                                                                                                                                                                                                                                                                                                                                                                                                                                                                                                                                                                                                                                                                                                                                                                                                                                                                                                                                                                                                                                                                                                                                                                                                                                                                                                                                                                                                                     | 40                                                                                                                                                                                                                                                                                                                                                                                                                                                                                                                                                                                                                                                                                                                                                                                                                                                                                                                                                                                                                                                                                                                                                                                                                                                                                                                                                                                                                                                                                                                                                                                                                                                                                                                                                                                                                                                                                                                                                             |
|----------------------------------------------------------------------------------------------------------------------------------------------------------------------------------------------------------------------------------------------------------------------------------------------------------------------------------------------------------------------------------------------------------------------------------------------------------------------------------------------------------------------------------------------------------------------------------------------------------------------------------------------------------------------------------------------------------------------------------------------------------------------------------------------------------------------------------------------------------------------------------------------------------------------------------------------------------------------------------------------------------------------------------------------------------------------------------------------------------------------------------------------------------------------------------------------------------------------------------------------------------------------------------------------------------------------------------------------------------------------------------------------------------------------------------------------------------------------------|-----------------------------------------------------------------------------------------------------------------------------------------------------------------------------------------------------------------------------------------------------------------------------------------------------------------------------------------------------------------------------------------------------------------------------------------------------------------------------------------------------------------------------------------------------------------------------------------------------------------------------------------------------------------------------------------------------------------------------------------------------------------------------------------------------------------------------------------------------------------------------------------------------------------------------------------------------------------------------------------------------------------------------------------------------------------------------------------------------------------------------------------------------------------------------------------------------------------------------------------------------------------------------------------------------------------------------------------------------------------------------------------------------------------------------------------------------------------------------------------------------------------------------------------------------------------------------------------------------------------------------------------------------------------------------------------------------------------------------------------------------------------------------------------------------------------------------------------------------------------------------------------------------------------------------------------------------------------------------------------------------------------------------------------------------------------------------------------------|-----------------------------------------------------------------------------------------------------------------------------------------------------------------------------------------------------------------------------------------------------------------------------------------------------------------------------------------------------------------------------------------------------------------------------------------------------------------------------------------------------------------------------------------------------------------------------------------------------------------------------------------------------------------------------------------------------------------------------------------------------------------------------------------------------------------------------------------------------------------------------------------------------------------------------------------------------------------------------------------------------------------------------------------------------------------------------------------------------------------------------------------------------------------------------------------------------------------------------------------------------------------------------------------------------------------------------------------------------------------------------------------------------------------------------------------------------------------------------------------------------------------------------------------------------------------------------------------------------------------------------------------------------------------------------------------------------------------------------------------------------------------------------------------------------------------------------------------------------------------------------------------------------------------------|-------------------------------------------------------------------------------------------------------------------------------------------------------------------------------------------------------------------------------------------------------------------------------------------------------------------------------------------------------------------------------------------------------------------------------------------------------------------------------------------------------------------------------------------------------------------------------------------------------------------------------------------------------------------------------------------------------------------------------------------------------------------------------------------------------------------------------------------------------------------------------------------------------------------------------------------------------------------------------------------------------------------------------------------------------------------------------------------------------------------------------------------------------------------------------------------------------------------------------------------------------------------------------------------------------------------------------------------------------------------------------------------------------------------------------------------------------------------------------------------------------------------------------------------------------------------------------------------------------------------------------------------------------------------------------------------------------------------------------------------------------------------------------------------------------------------------------------------------------------------------------------|----------------------------------------------------------------------------------------------------------------------------------------------------------------------------------------------------------------------------------------------------------------------------------------------------------------------------------------------------------------------------------------------------------------------------------------------------------------------------------------------------------------------------------------------------------------------------------------------------------------------------------------------------------------------------------------------------------------------------------------------------------------------------------------------------------------------------------------------------------------------------------------------------------------------------------------------------------------------------------------------------------------------------------------------------------------------------------------------------------------------------------------------------------------------------------------------------------------------------------------------------------------------------------------------------------------------------------------------------------------------------------------------------------------------------------------------------------------------------------------------------------------------------------------------------------------------------------------------------------------------------------------------------------------------------------------------------------------------------------------------------------------------------------------------------------------------------------------------------------------------------------------------------------|--------------------------------------------------------------------------------------------------------------------------------------------------------------------------------------------------------------------------------------------------------------------------------------------------------------------------------------------------------------------------------------------------------------------------------------------------------------------------------------------------------------------------------------------------------------------------------------------------------------------------------------------------------------------------------------------------------------------------------------------------------------------------------------------------------------------------------------------------------------------------------------------------------------------------------------------------------------------------------------------------------------------------------------------------------------------------------------------------------------------------------------------------------------------------------------------------------------------------------------------------------------------------------------------------------------------------------------------------------------------------------------------------------------------------------------------------------------------------------------------------------------------------------------------------------------------------------------------------------------------------------------------------------------------------------------------------------------------------------------------------------------------------------------------------------------------------------------------------------------------------------------------------------------------------------------------------------------------------------------------------------------------------------------------------------------------------------------------------------------------------------------------|----------------------------------------------------------------------------------------------------------------------------------------------------------------------------------------------------------------------------------------------------------------------------------------------------------------------------------------------------------------------------------------------------------------------------------------------------------------------------------------------------------------------------------------------------------------------------------------------------------------------------------------------------------------------------------------------------------------------------------------------------------------------------------------------------------------------------------------------------------------------------------------------------------------------------------------------------------------------------------------------------------------------------------------------------------------------------------------------------------------------------------------------------------------------------------------------------------------------------------------------------------------------------------------------------------------------------------------------------------------------------------------------------------------------------------------------------------------------------------------------------------------------------------------------------------------------------------------------------------------------------------------------------------------------------------------------------------------------------------------------------------------------------------------------------------------------------------------|----------------------------------------------------------------------------------------------------------------------------------------------------------------------------------------------------------------------------------------------------------------------------------------------------------------------------------------------------------------------------------------------------------------------------------------------------------------------------------------------------------------------------------------------------------------------------------------------------------------------------------------------------------------------------------------------------------------------------------------------------------------------------------------------------------------------------------------------------------------------------------------------------------------------------------------------------------------------------------------------------------------------------------------------------------------------------------------------------------------------------------------------------------------------------------------------------------------------------------------------------------------------------------------------------------------------------------------------------------------------------------------------------------------------------------------------------------------------------------------------------------------------------------------------------------------------------------------------------------------------------------------------------------------------------------------------------------------------------------------------------------------------------------------------------------------------------------------------------------------------------------------------------------------------------------------------------------------|
| M <sub>14</sub> T <sub>9</sub> T <sub>13</sub> L <sub>1</sub> Q <sub>14</sub> L <sub>10</sub> F <sub>14</sub> K <sub>14</sub> T <sub>14</sub> V <sub>10</sub> Q <sub>14</sub> F <sub>14</sub> G <sub>14</sub> S <sub>14</sub> F <sub>14</sub> E <sub>14</sub> P <sub>13</sub> V <sub>9</sub> T <sub>14</sub> I <sub>1</sub> E <sub>9</sub> C <sub>13</sub> T <sub>9</sub> T <sub>10</sub> D <sub>8</sub> E <sub>9</sub> I <sub>8</sub> P <sub>10</sub> K <sub>13</sub> M <sub>10</sub> P <sub>14</sub> A <sub>9</sub> Y <sub>8</sub> I <sub>10</sub> A <sub>10</sub> N <sub>9</sub> A <sub>9</sub> E <sub>9</sub> G <sub>9</sub> S <sub>9</sub><br>A <sub>5</sub> S <sub>1</sub> V <sub>1</sub> V <sub>4</sub> I <sub>4</sub> L <sub>1</sub> I <sub>5</sub> K <sub>5</sub> F <sub>1</sub> D <sub>4</sub> S <sub>2</sub> E <sub>4</sub> P <sub>3</sub> V <sub>6</sub> L <sub>3</sub> Q <sub>1</sub> N <sub>2</sub> K <sub>3</sub> F <sub>2</sub> N <sub>2</sub> E <sub>3</sub> E <sub>4</sub> L <sub>2</sub> S <sub>2</sub> K <sub>2</sub> A <sub>1</sub><br>D <sub>1</sub> G <sub>2</sub> S <sub>1</sub> G <sub>1</sub> D <sub>1</sub> T <sub>1</sub> H <sub>1</sub> T <sub>1</sub> K <sub>1</sub> S <sub>1</sub> G <sub>1</sub> T <sub>2</sub> I <sub>1</sub> M <sub>1</sub><br>N <sub>1</sub> V <sub>1</sub> T <sub>1</sub> K <sub>1</sub> V <sub>1</sub> N <sub>1</sub><br>N <sub>1</sub> V <sub>1</sub> P <sub>1</sub> V <sub>1</sub><br>A <sub>1</sub> T <sub>1</sub> | S <sub>12</sub> N <sub>9</sub> A <sub>9</sub> L <sub>9</sub> E <sub>14</sub> N <sub>8</sub> A <sub>8</sub> P <sub>8</sub> E <sub>9</sub> L <sub>9</sub> V <sub>9</sub> S <sub>10</sub> G <sub>9</sub> N <sub>8</sub> D <sub>6</sub> N <sub>8</sub> Q <sub>9</sub> K <sub>12</sub> V <sub>9</sub> K <sub>10</sub> F <sub>9</sub> K <sub>9</sub> P <sub>9</sub> I <sub>8</sub> D <sub>9</sub> L <sub>9</sub> Y <sub>9</sub> S <sub>9</sub> I <sub>9</sub> I <sub>9</sub> G <sub>9</sub> N <sub>9</sub> S <sub>10</sub> I <sub>9</sub> Y <sub>13</sub> C <sub>9</sub> R <sub>9</sub> S <sub>9</sub> Y <sub>8</sub> V <sub>8</sub><br>G <sub>1</sub> E <sub>3</sub> V <sub>3</sub> E <sub>3</sub> K <sub>2</sub> K <sub>3</sub> E <sub>4</sub> V <sub>3</sub> C <sub>3</sub> E <sub>2</sub> K <sub>3</sub> K <sub>1</sub> Q <sub>4</sub> S <sub>5</sub> L <sub>2</sub> T <sub>2</sub> V <sub>3</sub> Q <sub>1</sub> P <sub>3</sub> I <sub>3</sub> D <sub>4</sub> L <sub>4</sub> F <sub>3</sub> S <sub>4</sub> I <sub>3</sub> I <sub>3</sub> G <sub>4</sub> N <sub>4</sub> S <sub>4</sub> V <sub>4</sub> Y <sub>4</sub> C <sub>4</sub> R <sub>3</sub> S <sub>4</sub> R <sub>1</sub> V <sub>4</sub> A <sub>4</sub> L <sub>4</sub> S <sub>4</sub> N <sub>4</sub><br>V <sub>1</sub> G <sub>1</sub> E <sub>2</sub> K <sub>1</sub> S <sub>1</sub> S <sub>2</sub> K <sub>1</sub> L <sub>2</sub> H <sub>1</sub> G <sub>1</sub> G <sub>1</sub> Q <sub>1</sub> D <sub>1</sub> G <sub>1</sub> N <sub>2</sub> K <sub>1</sub> T <sub>2</sub> E <sub>1</sub> F <sub>1</sub> V <sub>1</sub> P <sub>1</sub> I <sub>1</sub> D <sub>1</sub> L <sub>1</sub> Y <sub>1</sub> S <sub>1</sub> I <sub>1</sub> I <sub>1</sub> G <sub>1</sub> N <sub>1</sub> S <sub>1</sub> I <sub>1</sub> Y <sub>1</sub> C <sub>1</sub> S <sub>1</sub> Y <sub>1</sub> V <sub>1</sub> A <sub>1</sub> L <sub>2</sub><br>L <sub>1</sub> N <sub>1</sub> V <sub>1</sub> P <sub>1</sub> V <sub>1</sub> E <sub>1</sub> V <sub>1</sub> Q <sub>1</sub> T <sub>1</sub> E <sub>1</sub> S <sub>1</sub> S <sub>1</sub> M <sub>1</sub><br>Q <sub>1</sub> | A <sub>9</sub> L <sub>13</sub> K <sub>9</sub> N <sub>9</sub> F <sub>9</sub> L <sub>9</sub> N <sub>9</sub> N <sub>9</sub> T <sub>9</sub> K <sub>9</sub> W <sub>9</sub> G <sub>9</sub> G <sub>9</sub> V <sub>9</sub> F <sub>9</sub> K <sub>10</sub> N <sub>8</sub> K <sub>9</sub> K <sub>9</sub> G <sub>9</sub> Q <sub>9</sub> E <sub>9</sub> T <sub>9</sub> S <sub>9</sub> A <sub>9</sub> A <sub>9</sub> G <sub>9</sub> R <sub>9</sub> L <sub>9</sub> S <sub>11</sub> R <sub>9</sub> A <sub>9</sub> T <sub>9</sub> S <sub>9</sub> Y <sub>13</sub> G <sub>9</sub> F <sub>9</sub> M <sub>9</sub> Y <sub>9</sub> D <sub>9</sub><br>F <sub>4</sub> N <sub>1</sub> N <sub>1</sub> D <sub>4</sub> T <sub>4</sub> K <sub>4</sub> W <sub>4</sub> G <sub>4</sub> G <sub>4</sub> V <sub>4</sub> F <sub>4</sub> K <sub>4</sub> N <sub>4</sub> K <sub>4</sub> K <sub>4</sub> G <sub>4</sub> Q <sub>3</sub> E <sub>4</sub> L <sub>4</sub> Q <sub>3</sub> A <sub>4</sub> A <sub>4</sub> K <sub>3</sub> R <sub>4</sub> L <sub>4</sub> S <sub>3</sub> S <sub>4</sub> A <sub>4</sub> T <sub>4</sub> A <sub>1</sub> Y <sub>4</sub> G <sub>4</sub> F <sub>4</sub> M <sub>4</sub> F <sub>4</sub> D <sub>4</sub> P <sub>4</sub> V <sub>4</sub> L <sub>4</sub> K <sub>4</sub><br>K <sub>1</sub> F <sub>1</sub> L <sub>1</sub> N <sub>1</sub> N <sub>1</sub> A <sub>1</sub> K <sub>1</sub> W <sub>1</sub> G <sub>1</sub> G <sub>1</sub> V <sub>1</sub> F <sub>1</sub> S <sub>1</sub> N <sub>1</sub> H <sub>1</sub> G <sub>1</sub> Q <sub>1</sub> E <sub>1</sub> T <sub>1</sub> S <sub>1</sub> Q <sub>1</sub> A <sub>1</sub> G <sub>1</sub> R <sub>2</sub> L <sub>1</sub> S <sub>1</sub> R <sub>1</sub> T <sub>1</sub> S <sub>1</sub> Y <sub>1</sub> G <sub>1</sub> M <sub>1</sub> Y <sub>1</sub> D <sub>1</sub> P <sub>1</sub> V <sub>1</sub><br>M <sub>1</sub> S <sub>1</sub> K <sub>1</sub> P <sub>1</sub> A <sub>1</sub><br>D <sub>1</sub> | P <sub>9</sub> V <sub>9</sub> A <sub>10</sub> R <sub>9</sub> A <sub>9</sub> F <sub>9</sub> E <sub>9</sub> C <sub>9</sub> P <sub>9</sub> V <sub>9</sub> C <sub>9</sub> S <sub>9</sub> V <sub>9</sub> K <sub>9</sub> A <sub>9</sub> T <sub>9</sub> E <sub>10</sub> L <sub>9</sub> E <sub>9</sub> A <sub>9</sub> F <sub>9</sub> S <sub>9</sub> S <sub>9</sub> D <sub>9</sub> C <sub>9</sub> S <sub>9</sub> H <sub>9</sub> C <sub>9</sub> F <sub>9</sub> E <sub>9</sub> I <sub>9</sub> K <sub>9</sub> H <sub>9</sub> V <sub>8</sub> G <sub>9</sub> D <sub>9</sub> P <sub>9</sub> R <sub>9</sub> I <sub>9</sub> T <sub>11</sub><br>A <sub>5</sub> F <sub>3</sub> E <sub>4</sub> C <sub>4</sub> P <sub>4</sub> K <sub>2</sub> C <sub>4</sub> S <sub>4</sub> T <sub>4</sub> K <sub>4</sub> A <sub>4</sub> T <sub>4</sub> E <sub>4</sub> L <sub>4</sub> E <sub>5</sub> A <sub>4</sub> F <sub>4</sub> C <sub>4</sub> S <sub>4</sub> D <sub>4</sub> C <sub>4</sub> D <sub>5</sub> H <sub>4</sub> C <sub>4</sub> F <sub>4</sub> E <sub>4</sub> I <sub>3</sub> K <sub>4</sub> H <sub>4</sub> I <sub>4</sub> G <sub>4</sub> D <sub>4</sub> G <sub>2</sub> R <sub>3</sub> D <sub>4</sub> T <sub>4</sub> K <sub>4</sub> L <sub>2</sub> D <sub>3</sub> V <sub>3</sub><br>Y <sub>1</sub> F <sub>1</sub> E <sub>1</sub> I <sub>1</sub> P <sub>1</sub> V <sub>1</sub> C <sub>1</sub> S <sub>1</sub> V <sub>1</sub> K <sub>1</sub> A <sub>1</sub> T <sub>1</sub> L <sub>1</sub> A <sub>1</sub> F <sub>1</sub> S <sub>1</sub> S <sub>1</sub> C <sub>1</sub> S <sub>1</sub> H <sub>1</sub> C <sub>1</sub> F <sub>1</sub> E <sub>1</sub> I <sub>1</sub> K <sub>1</sub> H <sub>1</sub> I <sub>1</sub> D <sub>2</sub> I <sub>1</sub> P <sub>1</sub> R <sub>1</sub> I <sub>1</sub> M <sub>2</sub> E <sub>1</sub><br>R <sub>1</sub> S <sub>1</sub> V <sub>1</sub> N <sub>1</sub> D <sub>1</sub> S <sub>1</sub> | K <sub>9</sub> T <sub>10</sub> E <sub>9</sub> T <sub>9</sub> Q <sub>9</sub> F <sub>9</sub> Y <sub>9</sub> P <sub>9</sub> L <sub>9</sub> N <sub>10</sub> P <sub>9</sub> N <sub>9</sub> E <sub>9</sub> L <sub>9</sub> D <sub>9</sub> V <sub>12</sub> T <sub>9</sub> E <sub>13</sub> E <sub>9</sub> L <sub>9</sub> D <sub>9</sub> V <sub>12</sub> S <sub>10</sub> S <sub>9</sub> S <sub>9</sub> V <sub>9</sub> W <sub>9</sub> L <sub>9</sub> D <sub>10</sub> E <sub>13</sub> D <sub>9</sub> V <sub>13</sub> E <sub>9</sub> E <sub>9</sub> A <sub>9</sub> V <sub>9</sub> V <sub>9</sub> D <sub>9</sub> S <sub>9</sub><br>Q <sub>4</sub> F <sub>4</sub> Y <sub>4</sub> P <sub>4</sub> V <sub>2</sub> N <sub>4</sub> P <sub>4</sub> I <sub>4</sub> E <sub>4</sub> L <sub>4</sub> D <sub>4</sub> T <sub>4</sub> T <sub>4</sub> D <sub>3</sub> E <sub>4</sub> I <sub>3</sub> L <sub>3</sub> L <sub>3</sub> V <sub>4</sub> A <sub>4</sub> T <sub>3</sub> S <sub>4</sub> T <sub>1</sub> W <sub>4</sub> F <sub>4</sub> E <sub>4</sub> E <sub>4</sub> D <sub>4</sub> V <sub>4</sub> K <sub>4</sub> V <sub>4</sub> E <sub>1</sub> V <sub>4</sub> D <sub>4</sub> K <sub>4</sub> L <sub>4</sub> I <sub>4</sub> T <sub>3</sub> T <sub>4</sub><br>E <sub>1</sub> Q <sub>1</sub> F <sub>1</sub> S <sub>1</sub> P <sub>1</sub> L <sub>1</sub> N <sub>1</sub> P <sub>1</sub> E <sub>1</sub> L <sub>1</sub> D <sub>1</sub> E <sub>1</sub> T <sub>1</sub> E <sub>1</sub> E <sub>1</sub> A <sub>1</sub> D <sub>1</sub> S <sub>1</sub> A <sub>1</sub> S <sub>1</sub> M <sub>1</sub> W <sub>1</sub> G <sub>1</sub> G <sub>1</sub> E <sub>1</sub> K <sub>1</sub> T <sub>1</sub> V <sub>1</sub> S <sub>1</sub> D <sub>1</sub> S <sub>1</sub> A <sub>1</sub> V <sub>1</sub><br>Y <sub>1</sub> S <sub>1</sub> V <sub>1</sub> V <sub>1</sub> L <sub>1</sub> V <sub>1</sub> L <sub>1</sub> T <sub>1</sub> M <sub>1</sub> L <sub>1</sub> | L <sub>9</sub> V <sub>9</sub> S <sub>9</sub> T <sub>9</sub> E <sub>8</sub> R <sub>9</sub> K <sub>12</sub> D <sub>9</sub> I <sub>8</sub> V <sub>13</sub> K <sub>9</sub> V <sub>9</sub> S <sub>9</sub> T <sub>8</sub> A <sub>9</sub> L <sub>9</sub> V <sub>9</sub> K <sub>11</sub> T <sub>8</sub> K <sub>10</sub> H <sub>9</sub> E <sub>9</sub> P <sub>9</sub> S <sub>6</sub> I <sub>9</sub> V <sub>9</sub> A <sub>9</sub> N <sub>8</sub> T <sub>8</sub> S <sub>11</sub> D <sub>9</sub> L <sub>13</sub> T <sub>14</sub> K <sub>9</sub> I <sub>9</sub> L <sub>9</sub> T <sub>9</sub> Q <sub>7</sub> I <sub>9</sub> C <sub>9</sub><br>D <sub>4</sub> E <sub>3</sub> K <sub>4</sub> N <sub>3</sub> M <sub>3</sub> V <sub>3</sub> I <sub>3</sub> T <sub>4</sub> S <sub>4</sub> I <sub>3</sub> A <sub>4</sub> L <sub>4</sub> V <sub>4</sub> K <sub>4</sub> N <sub>3</sub> K <sub>2</sub> Y <sub>3</sub> E <sub>3</sub> P <sub>4</sub> S <sub>2</sub> I <sub>3</sub> V <sub>3</sub> A <sub>3</sub> N <sub>4</sub> V <sub>4</sub> S <sub>4</sub> D <sub>3</sub> L <sub>4</sub> I <sub>3</sub> K <sub>3</sub> T <sub>5</sub> K <sub>1</sub> Q <sub>4</sub> T <sub>7</sub> C <sub>4</sub> C <sub>4</sub> E <sub>3</sub> T <sub>2</sub> G <sub>4</sub><br>S <sub>1</sub> K <sub>1</sub> E <sub>1</sub> C <sub>1</sub> I <sub>1</sub> D <sub>1</sub> S <sub>1</sub> V <sub>1</sub> V <sub>1</sub> S <sub>1</sub> T <sub>1</sub> A <sub>1</sub> I <sub>1</sub> K <sub>1</sub> S <sub>2</sub> E <sub>1</sub> H <sub>1</sub> E <sub>1</sub> M <sub>1</sub> I <sub>1</sub> I <sub>1</sub> K <sub>3</sub> T <sub>1</sub> N <sub>1</sub> V <sub>1</sub> S <sub>1</sub> V <sub>2</sub> L <sub>1</sub> L <sub>1</sub> Q <sub>1</sub> I <sub>1</sub> K <sub>1</sub> C <sub>1</sub> E <sub>1</sub><br>T <sub>1</sub> D <sub>1</sub> K <sub>1</sub> M <sub>1</sub> K <sub>1</sub> L <sub>1</sub> V <sub>1</sub> E <sub>1</sub> T <sub>1</sub> I <sub>1</sub> Y <sub>1</sub> P <sub>1</sub> S <sub>1</sub> T <sub>1</sub> V <sub>1</sub> E <sub>1</sub> D <sub>1</sub> R <sub>1</sub> S <sub>1</sub><br>D <sub>1</sub> C <sub>1</sub> A <sub>1</sub> D <sub>1</sub> | C <sub>9</sub> E <sub>9</sub> S <sub>9</sub> G <sub>9</sub> M <sub>10</sub> P <sub>9</sub> M <sub>9</sub> I <sub>9</sub> D <sub>10</sub> L <sub>9</sub> D <sub>9</sub> H <sub>9</sub> R <sub>9</sub> K <sub>9</sub> S <sub>9</sub> S <sub>9</sub> A <sub>9</sub> I <sub>9</sub> P <sub>9</sub> M <sub>9</sub> V <sub>9</sub> H <sub>9</sub> L <sub>9</sub> K <sub>9</sub> H <sub>9</sub> V <sub>9</sub> Y <sub>9</sub> G <sub>9</sub> I <sub>8</sub> I <sub>9</sub> E <sub>9</sub> E <sub>9</sub> D <sub>9</sub> D <sub>9</sub> L <sub>9</sub> S <sub>11</sub> E <sub>9</sub> E <sub>9</sub> D <sub>9</sub> S <sub>9</sub><br>M <sub>4</sub> P <sub>4</sub> I <sub>4</sub> D <sub>4</sub> L <sub>4</sub> D <sub>5</sub> H <sub>2</sub> K <sub>4</sub> K <sub>4</sub> S <sub>4</sub> K <sub>5</sub> A <sub>4</sub> I <sub>4</sub> P <sub>4</sub> M <sub>4</sub> V <sub>4</sub> R <sub>4</sub> L <sub>3</sub> K <sub>4</sub> H <sub>4</sub> V <sub>4</sub> F <sub>4</sub> G <sub>4</sub> V <sub>4</sub> L <sub>3</sub> E <sub>4</sub> S <sub>4</sub> D <sub>4</sub> D <sub>4</sub> L <sub>4</sub> F <sub>4</sub> E <sub>4</sub> E <sub>4</sub> D <sub>4</sub> E <sub>1</sub> V <sub>4</sub> F <sub>4</sub> L <sub>4</sub> E <sub>4</sub><br>S <sub>1</sub> G <sub>1</sub> M <sub>1</sub> P <sub>1</sub> I <sub>1</sub> Y <sub>2</sub> H <sub>1</sub> R <sub>1</sub> S <sub>1</sub> S <sub>1</sub> A <sub>1</sub> I <sub>1</sub> P <sub>1</sub> M <sub>1</sub> V <sub>2</sub> H <sub>1</sub> L <sub>1</sub> K <sub>1</sub> H <sub>1</sub> V <sub>1</sub> Y <sub>1</sub> G <sub>1</sub> I <sub>1</sub> I <sub>1</sub> E <sub>1</sub> E <sub>1</sub> D <sub>1</sub> D <sub>1</sub> L <sub>1</sub> S <sub>1</sub> E <sub>1</sub> D <sub>1</sub> S <sub>1</sub> G <sub>1</sub> F <sub>1</sub><br>L <sub>1</sub> R <sub>1</sub> V <sub>1</sub> | G <sub>8</sub> F <sub>9</sub> L <sub>9</sub> E <sub>9</sub> H <sub>9</sub> V <sub>9</sub> N <sub>9</sub> A <sub>8</sub> S <sub>8</sub> K <sub>9</sub> V <sub>9</sub> F <sub>9</sub> W <sub>9</sub> S <sub>9</sub> C <sub>9</sub> E <sub>9</sub> K <sub>9</sub> I <sub>9</sub> C <sub>8</sub> Y <sub>9</sub> N <sub>8</sub> M <sub>9</sub> V <sub>9</sub> S <sub>12</sub> P <sub>9</sub> G <sub>9</sub> W <sub>9</sub> S <sub>9</sub> G <sub>9</sub> A <sub>9</sub> V <sub>9</sub> M <sub>9</sub> M <sub>9</sub> S <sub>10</sub> S <sub>6</sub> S <sub>9</sub> V <sub>8</sub> Q <sub>9</sub> E <sub>12</sub> N <sub>9</sub><br>H <sub>4</sub> S <sub>3</sub> N <sub>4</sub> A <sub>4</sub> S <sub>4</sub> K <sub>4</sub> V <sub>4</sub> F <sub>4</sub> R <sub>5</sub> S <sub>4</sub> C <sub>4</sub> E <sub>4</sub> K <sub>4</sub> V <sub>4</sub> S <sub>4</sub> Y <sub>4</sub> S <sub>4</sub> M <sub>4</sub> V <sub>4</sub> S <sub>4</sub> P <sub>4</sub> G <sub>4</sub> W <sub>4</sub> G <sub>1</sub> G <sub>4</sub> A <sub>4</sub> V <sub>3</sub> M <sub>4</sub> M <sub>4</sub> E <sub>4</sub> D <sub>4</sub> S <sub>4</sub> V <sub>4</sub> Q <sub>3</sub> G <sub>4</sub> I <sub>3</sub> D <sub>4</sub> R <sub>4</sub> G <sub>2</sub> K <sub>4</sub><br>L <sub>1</sub> G <sub>1</sub> H <sub>1</sub> V <sub>1</sub> N <sub>1</sub> A <sub>1</sub> R <sub>1</sub> K <sub>1</sub> V <sub>1</sub> F <sub>1</sub> W <sub>1</sub> S <sub>1</sub> C <sub>1</sub> E <sub>1</sub> K <sub>1</sub> I <sub>1</sub> G <sub>1</sub> Y <sub>1</sub> S <sub>1</sub> M <sub>1</sub> D <sub>1</sub> S <sub>1</sub> P <sub>1</sub> K <sub>1</sub> W <sub>1</sub> S <sub>1</sub> G <sub>1</sub> A <sub>1</sub> I <sub>1</sub> M <sub>1</sub> M <sub>1</sub> I <sub>1</sub> D <sub>1</sub> L <sub>1</sub> P <sub>3</sub> T <sub>1</sub> I <sub>1</sub> S <sub>1</sub> H <sub>1</sub><br>S <sub>1</sub> E <sub>1</sub> T <sub>1</sub> V <sub>1</sub> Q <sub>1</sub> E <sub>1</sub> |

|                                                                                                                                                                                                                                                                                                                                                                                                                                                                                                                                                                                                                                          |     |     |     |     |     |     |     |
|------------------------------------------------------------------------------------------------------------------------------------------------------------------------------------------------------------------------------------------------------------------------------------------------------------------------------------------------------------------------------------------------------------------------------------------------------------------------------------------------------------------------------------------------------------------------------------------------------------------------------------------|-----|-----|-----|-----|-----|-----|-----|
| 325                                                                                                                                                                                                                                                                                                                                                                                                                                                                                                                                                                                                                                      | 330 | 335 | 340 | 345 | 350 | 355 | 360 |
| E, H, D, M, F, D, F, V, D, D, M, C, V, V, Q, G, K, N, K, I, S, G, K, I, E, N, A, L, V, S, K, S, W, D, E, L, Q, Q, I, E,<br>F, M, F, I, D, G, M, C, V, V, Q, G, K, N, K, S, S, G, R, G, E, N, A, L, V, L, K, S, S, E, D, L, S, E, I, E, L, Y, S, F,<br>D, V, V, N, D, M, C, V, V, Q, G, E, I, E, N, I, S, V, K, I, E, N, A, P, V, K, D, W, D, G, L, Q, Q, I, H, M, Y,<br>N, N, N, E, E, D, E                                                                                                                                                                                                                                              |     |     |     |     |     |     |     |
| 365                                                                                                                                                                                                                                                                                                                                                                                                                                                                                                                                                                                                                                      | 370 | 375 | 380 | 385 | 390 | 395 | 400 |
| M, Y, S, F, D, L, S, W, A, R, S, R, D, D, F, F, K, Y, F, D, E, D, V, G, S, L, I, S, T, C, C, T, P, S, T, L, W, L, Y, A,<br>D, L, D, W, A, R, T, R, D, N, F, F, R, H, K, I, D, D, V, G, K, L, I, S, T, C, C, T, P, S, T, L, W, L, Y, A, K, K, A, S,<br>S, F, L, S, W, A, S, D, D, F, F, Y, F, E, N, V, S, S, L, I, S, T, C, C, T, P, S, T, L, W, L, Y, A, K, K,<br>Y, N                                                                                                                                                                                                                                                                   |     |     |     |     |     |     |     |
| 405                                                                                                                                                                                                                                                                                                                                                                                                                                                                                                                                                                                                                                      | 410 | 415 | 420 | 425 | 430 | 435 | 440 |
| K, K, A, S, F, Y, K, Y, V, D, H, M, I, L, K, G, S, P, L, V, D, I, L, V, K, M, E, Y, V, G, K, H, L, E, M, F, N, S, V, E,<br>F, Y, K, Y, V, D, H, M, I, L, K, G, S, P, L, V, D, I, L, K, M, E, Y, V, G, K, H, L, E, M, F, N, S, V, E, D, V, C, L,<br>A, S, F, K, V, D, H, M, I, L, K, G, S, P, L, V, L, V, K, M, E, Y, V, G, K, H, L, E, M, F, N, S, V, E, D, V,<br>C, L, E, Y, A, H, F, M, Q, D, M, I, L, E, Q, V, N, V, Q, S, D, E, N, M, M, R, V, K, N, L, I, R, S, Y, F, D, F, V, I, E, I, N,<br>C, L, E, Y, A, H, F, M, V, D, M, I, L, C, T, D, Q, S, H, E, D, I, L, L, R, V, K, N, L, I, R, S, Y, D, S, V, E,<br>Q, D, N, S, T, N, M |     |     |     |     |     |     |     |
| 445                                                                                                                                                                                                                                                                                                                                                                                                                                                                                                                                                                                                                                      | 450 | 455 | 460 | 465 | 470 | 475 | 480 |
| D, V, C, L, E, Y, A, H, F, M, Q, D, M, I, L, E, Q, V, N, V, Q, S, D, E, N, M, M, R, V, K, N, L, I, R, S, Y, F, D, F, V, I, E, I, N,<br>C, L, E, Y, A, H, F, M, V, D, M, I, L, C, T, D, Q, S, H, E, D, I, L, L, R, V, K, N, L, I, R, S, Y, D, S, V, E, M,<br>Q, D, N, S, T, N, M                                                                                                                                                                                                                                                                                                                                                          |     |     |     |     |     |     |     |
| 485                                                                                                                                                                                                                                                                                                                                                                                                                                                                                                                                                                                                                                      | 490 | 495 | 500 | 505 | 510 | 515 | 520 |
| I, E, A, N, K, Y, E, L, I, D, R, I, D, K, K, T, Q, L, E, A, Q, E, I, I, S, R, E, L, I, K, H, Q, Y, G, A, L, F, S, L,<br>K, Y, E, L, I, D, S, L, R, I, K, K, S, E, L, E, A, E, I, E, V, L, S, R, E, L, I, K, H, Q, Y, G, D, L, F, S, L, R, E, R, E,<br>A, N, K, S, E, L, I, D, E, I, E, K, K, T, Q, L, A, Q, E, I, I, S, R, E, L, I, K, H, Q, Y, G, A, L, F, S, L,<br>Y, S, S, S                                                                                                                                                                                                                                                          |     |     |     |     |     |     |     |
| 525                                                                                                                                                                                                                                                                                                                                                                                                                                                                                                                                                                                                                                      | 530 | 535 | 540 | 545 | 550 | 555 | 560 |
| R, E, R, I, S, T, N, I, G, F, D, S, A, S, L, S, L, W, K, E, S, E, S, L, S, R, S, D, S, S, F, F, S, C, L, M, S, S, P,<br>L, I, N, G, F, D, S, A, K, L, S, L, W, E, E, S, E, S, V, K, Q, K, S, K, S, I, I, C, L, L, K, P, G, M, E, M,<br>M, S, N, V, G, F, D, S, A, L, S, L, W, K, M, L, G, D, V, S, F, S, C, M, S, S, P, G,<br>Q, R                                                                                                                                                                                                                                                                                                       |     |     |     |     |     |     |     |
| 565                                                                                                                                                                                                                                                                                                                                                                                                                                                                                                                                                                                                                                      | 570 | 575 | 580 | 585 | 590 | 595 | 600 |
| G, M, E, M, C, A, N, W, I, L, S, V, C, S, S, S, N, T, L, Y, L, V, D, K, G, V, V, F, F, W, S, M, V, H, I, F, Q,<br>L, A, N, W, I, S, E, V, F, K, N, C, Y, N, T, M, Y, L, V, D, R, S, M, M, F, I, W, N, R, M, V, V, I, F, N, S, C, V, Y,<br>F, C, A, N, W, T, T, A, T, S, K, S, Y, N, I, Y, M, V, D, K, G, V, V, F, F, W, S, S, V, V, I, F, I, Q, T, C,<br>E, S, L, S, V, C, S, S, S, I, H                                                                                                                                                                                                                                                 |     |     |     |     |     |     |     |
| 605                                                                                                                                                                                                                                                                                                                                                                                                                                                                                                                                                                                                                                      | 610 | 615 | 620 | 625 | 630 | 635 | 640 |
| T, C, V, Y, G, Y, W, N, L, W, F, S, K, A, V, C, V, L, M, A, F, V, I, M, G, F, S, G, K, A, M, D, Y, L, K, K, L, I, K, N,<br>G, Y, W, N, L, W, F, R, K, A, V, C, V, L, M, V, F, V, V, T, G, F, S, S, K, I, I, E, F, L, K, K, L, I, L, N, E, S, E, Q,<br>V, G, W, N, L, W, F, S, M, A, C, L, M, A, F, V, I, M, G, F, S, G, K, V, M, V, Y, L, K, M, I, K, N, S,<br>K, M, D, S, K, M                                                                                                                                                                                                                                                          |     |     |     |     |     |     |     |
| 645                                                                                                                                                                                                                                                                                                                                                                                                                                                                                                                                                                                                                                      | 650 | 655 | 660 | 665 | 670 | 675 | 680 |
| E, S, K, Q, A, I, Q, Y, E, E, G, L, V, E, V, Q, G, S, S, E, E, S, F, V, L, R, W, C, A, F, A, T, L, F, L, S, F, M, N, Y, D, W, A, V,<br>A, M, Q, F, E, E, G, L, V, L, V, Q, G, S, K, E, E, E, F, V, L, R, W, C, A, F, A, T, L, T, L, S, F, M, N, Y, D, W, A, V,<br>S, Q, A, I, Q, Y, E, E, G, E, Q, G, S, K, K, S, F, V, L, R, W, C, F, F, F, I, F, I, N, Y, D, W,<br>I, E, S, S                                                                                                                                                                                                                                                          |     |     |     |     |     |     |     |
| 685                                                                                                                                                                                                                                                                                                                                                                                                                                                                                                                                                                                                                                      | 690 | 695 | 700 | 705 | 710 | 715 | 720 |
| D, W, A, V, G, S, V, S, A, I, G, K, M, K, T, V, F, G, A, L, G, P, D, F, I, E, S, Q, S, D, D, N, L, K, F, T, T, F, E, V, E,<br>G, S, V, S, A, I, G, K, M, K, T, M, F, G, A, L, G, P, D, F, I, E, S, Q, S, G, D, E, D, N, L, K, F, T, T, F, E, V, E,<br>A, V, G, V, A, I, G, M, T, I, F, I, A, L, G, P, D, F, I, E, N, Q, D, N, E, L, S, F, K, T, F,<br>G, T                                                                                                                                                                                                                                                                               |     |     |     |     |     |     |     |







|                                                                                                                                                                                                                                                                                                                                                                                                                                                                                                                                                                                                                                                                                                                                                                                                                                                                                                                                                                                                                                                                                                                                                                                                                                                                                                                                                                                                                                                                                                                                                                                                                                                                                                                                                                                                                                                                                                                                                                                                                                                                               |                                                                                                                                                                                                                                                                                                                                                                                                                                                                                                                                                                                                                                                                                                                                                                                                                                                                                                                                                                                                                                                                                                                                                                                                                                                                                                                                                                                                                                                                                                                                                                                                                                                                                                                                                                                                                                                                                    |                                                                                                                                                                                                                                                                                                                                                                                                                                                                                                                                                                                                                                                                                                                                                                                                                                                                                                                                                                                                                                                                                                                                                                                                                                                                                                                                                                                                                                                                                                                                                                                                                                                                                                                                                              |                                                                                                                                                                                                                                                                                                                                                                                                                                                                                                                                                                                                                                                                                                                                                                                                                                                                                                                                                                                                                                                                                                                                                                                                                                                                                                                                                                                                                                                                                                                                                                                                                                                                                                                                                                                                                                                                                                                       |                                                                                                                                                                                                                                                                                                                                                                                                                                                                                                                                                                                                                                                                                                                                                                                                                                                                                                                                                                                                                                                                                                                                                                                                                                                                                                                                                                                                                                                                                                                                                                                                                                                                                                                                                                                                                                          |                                                                                                                                                                                                                                                                                                                                                                                                                                                                                                                                                                                                                                                                                                                                                                                                                                                                                                                                                                                                                                                                                                                                                                                                                                                                                                                                                                                                                                                                                                                                                                                                                                                                                                                                                                                                                                                                                                                                                                   |                                                                                                                                                                                                                                                                                                                                                                                                                                                                                                                                                                                                                                                                                                                                                                                                                                                                                                                                                                                                                                                                                                                                                                                                                                                                                                                                                                                                                                                                                                                                                                                                                                                                                                                                                                               |                                                                                                                                                                                                                                                                                                                                                                                                                                                                                                                                                                                                                                                                                                                                                                                                                                                                                                                                                                                                                                                                                                                                                                                                                                                                                                                                                                                                                                                                                                                                                                                                                                                                                                                                                                                                                                                                                                                                  |                                                                                                                                                                                                                                                                                                                                                                                                                                                                                                                                                                                                                                                                                                                                                                                                                                                                                                                                                                                                                                                                                                                                                                                                                                                                                                                                                                                                                                                                                                                                                                                                                                                                                                                                                                                                                                                                                                                                                                |
|-------------------------------------------------------------------------------------------------------------------------------------------------------------------------------------------------------------------------------------------------------------------------------------------------------------------------------------------------------------------------------------------------------------------------------------------------------------------------------------------------------------------------------------------------------------------------------------------------------------------------------------------------------------------------------------------------------------------------------------------------------------------------------------------------------------------------------------------------------------------------------------------------------------------------------------------------------------------------------------------------------------------------------------------------------------------------------------------------------------------------------------------------------------------------------------------------------------------------------------------------------------------------------------------------------------------------------------------------------------------------------------------------------------------------------------------------------------------------------------------------------------------------------------------------------------------------------------------------------------------------------------------------------------------------------------------------------------------------------------------------------------------------------------------------------------------------------------------------------------------------------------------------------------------------------------------------------------------------------------------------------------------------------------------------------------------------------|------------------------------------------------------------------------------------------------------------------------------------------------------------------------------------------------------------------------------------------------------------------------------------------------------------------------------------------------------------------------------------------------------------------------------------------------------------------------------------------------------------------------------------------------------------------------------------------------------------------------------------------------------------------------------------------------------------------------------------------------------------------------------------------------------------------------------------------------------------------------------------------------------------------------------------------------------------------------------------------------------------------------------------------------------------------------------------------------------------------------------------------------------------------------------------------------------------------------------------------------------------------------------------------------------------------------------------------------------------------------------------------------------------------------------------------------------------------------------------------------------------------------------------------------------------------------------------------------------------------------------------------------------------------------------------------------------------------------------------------------------------------------------------------------------------------------------------------------------------------------------------|--------------------------------------------------------------------------------------------------------------------------------------------------------------------------------------------------------------------------------------------------------------------------------------------------------------------------------------------------------------------------------------------------------------------------------------------------------------------------------------------------------------------------------------------------------------------------------------------------------------------------------------------------------------------------------------------------------------------------------------------------------------------------------------------------------------------------------------------------------------------------------------------------------------------------------------------------------------------------------------------------------------------------------------------------------------------------------------------------------------------------------------------------------------------------------------------------------------------------------------------------------------------------------------------------------------------------------------------------------------------------------------------------------------------------------------------------------------------------------------------------------------------------------------------------------------------------------------------------------------------------------------------------------------------------------------------------------------------------------------------------------------|-----------------------------------------------------------------------------------------------------------------------------------------------------------------------------------------------------------------------------------------------------------------------------------------------------------------------------------------------------------------------------------------------------------------------------------------------------------------------------------------------------------------------------------------------------------------------------------------------------------------------------------------------------------------------------------------------------------------------------------------------------------------------------------------------------------------------------------------------------------------------------------------------------------------------------------------------------------------------------------------------------------------------------------------------------------------------------------------------------------------------------------------------------------------------------------------------------------------------------------------------------------------------------------------------------------------------------------------------------------------------------------------------------------------------------------------------------------------------------------------------------------------------------------------------------------------------------------------------------------------------------------------------------------------------------------------------------------------------------------------------------------------------------------------------------------------------------------------------------------------------------------------------------------------------|------------------------------------------------------------------------------------------------------------------------------------------------------------------------------------------------------------------------------------------------------------------------------------------------------------------------------------------------------------------------------------------------------------------------------------------------------------------------------------------------------------------------------------------------------------------------------------------------------------------------------------------------------------------------------------------------------------------------------------------------------------------------------------------------------------------------------------------------------------------------------------------------------------------------------------------------------------------------------------------------------------------------------------------------------------------------------------------------------------------------------------------------------------------------------------------------------------------------------------------------------------------------------------------------------------------------------------------------------------------------------------------------------------------------------------------------------------------------------------------------------------------------------------------------------------------------------------------------------------------------------------------------------------------------------------------------------------------------------------------------------------------------------------------------------------------------------------------|-------------------------------------------------------------------------------------------------------------------------------------------------------------------------------------------------------------------------------------------------------------------------------------------------------------------------------------------------------------------------------------------------------------------------------------------------------------------------------------------------------------------------------------------------------------------------------------------------------------------------------------------------------------------------------------------------------------------------------------------------------------------------------------------------------------------------------------------------------------------------------------------------------------------------------------------------------------------------------------------------------------------------------------------------------------------------------------------------------------------------------------------------------------------------------------------------------------------------------------------------------------------------------------------------------------------------------------------------------------------------------------------------------------------------------------------------------------------------------------------------------------------------------------------------------------------------------------------------------------------------------------------------------------------------------------------------------------------------------------------------------------------------------------------------------------------------------------------------------------------------------------------------------------------------------------------------------------------|-------------------------------------------------------------------------------------------------------------------------------------------------------------------------------------------------------------------------------------------------------------------------------------------------------------------------------------------------------------------------------------------------------------------------------------------------------------------------------------------------------------------------------------------------------------------------------------------------------------------------------------------------------------------------------------------------------------------------------------------------------------------------------------------------------------------------------------------------------------------------------------------------------------------------------------------------------------------------------------------------------------------------------------------------------------------------------------------------------------------------------------------------------------------------------------------------------------------------------------------------------------------------------------------------------------------------------------------------------------------------------------------------------------------------------------------------------------------------------------------------------------------------------------------------------------------------------------------------------------------------------------------------------------------------------------------------------------------------------------------------------------------------------|----------------------------------------------------------------------------------------------------------------------------------------------------------------------------------------------------------------------------------------------------------------------------------------------------------------------------------------------------------------------------------------------------------------------------------------------------------------------------------------------------------------------------------------------------------------------------------------------------------------------------------------------------------------------------------------------------------------------------------------------------------------------------------------------------------------------------------------------------------------------------------------------------------------------------------------------------------------------------------------------------------------------------------------------------------------------------------------------------------------------------------------------------------------------------------------------------------------------------------------------------------------------------------------------------------------------------------------------------------------------------------------------------------------------------------------------------------------------------------------------------------------------------------------------------------------------------------------------------------------------------------------------------------------------------------------------------------------------------------------------------------------------------------------------------------------------------------------------------------------------------------------------------------------------------------|----------------------------------------------------------------------------------------------------------------------------------------------------------------------------------------------------------------------------------------------------------------------------------------------------------------------------------------------------------------------------------------------------------------------------------------------------------------------------------------------------------------------------------------------------------------------------------------------------------------------------------------------------------------------------------------------------------------------------------------------------------------------------------------------------------------------------------------------------------------------------------------------------------------------------------------------------------------------------------------------------------------------------------------------------------------------------------------------------------------------------------------------------------------------------------------------------------------------------------------------------------------------------------------------------------------------------------------------------------------------------------------------------------------------------------------------------------------------------------------------------------------------------------------------------------------------------------------------------------------------------------------------------------------------------------------------------------------------------------------------------------------------------------------------------------------------------------------------------------------------------------------------------------------------------------------------------------------|
| 1565                                                                                                                                                                                                                                                                                                                                                                                                                                                                                                                                                                                                                                                                                                                                                                                                                                                                                                                                                                                                                                                                                                                                                                                                                                                                                                                                                                                                                                                                                                                                                                                                                                                                                                                                                                                                                                                                                                                                                                                                                                                                          | 1570                                                                                                                                                                                                                                                                                                                                                                                                                                                                                                                                                                                                                                                                                                                                                                                                                                                                                                                                                                                                                                                                                                                                                                                                                                                                                                                                                                                                                                                                                                                                                                                                                                                                                                                                                                                                                                                                               | 1575                                                                                                                                                                                                                                                                                                                                                                                                                                                                                                                                                                                                                                                                                                                                                                                                                                                                                                                                                                                                                                                                                                                                                                                                                                                                                                                                                                                                                                                                                                                                                                                                                                                                                                                                                         | 1580                                                                                                                                                                                                                                                                                                                                                                                                                                                                                                                                                                                                                                                                                                                                                                                                                                                                                                                                                                                                                                                                                                                                                                                                                                                                                                                                                                                                                                                                                                                                                                                                                                                                                                                                                                                                                                                                                                                  | 1585                                                                                                                                                                                                                                                                                                                                                                                                                                                                                                                                                                                                                                                                                                                                                                                                                                                                                                                                                                                                                                                                                                                                                                                                                                                                                                                                                                                                                                                                                                                                                                                                                                                                                                                                                                                                                                     | 1590                                                                                                                                                                                                                                                                                                                                                                                                                                                                                                                                                                                                                                                                                                                                                                                                                                                                                                                                                                                                                                                                                                                                                                                                                                                                                                                                                                                                                                                                                                                                                                                                                                                                                                                                                                                                                                                                                                                                                              | 1595                                                                                                                                                                                                                                                                                                                                                                                                                                                                                                                                                                                                                                                                                                                                                                                                                                                                                                                                                                                                                                                                                                                                                                                                                                                                                                                                                                                                                                                                                                                                                                                                                                                                                                                                                                          | 1600                                                                                                                                                                                                                                                                                                                                                                                                                                                                                                                                                                                                                                                                                                                                                                                                                                                                                                                                                                                                                                                                                                                                                                                                                                                                                                                                                                                                                                                                                                                                                                                                                                                                                                                                                                                                                                                                                                                             |                                                                                                                                                                                                                                                                                                                                                                                                                                                                                                                                                                                                                                                                                                                                                                                                                                                                                                                                                                                                                                                                                                                                                                                                                                                                                                                                                                                                                                                                                                                                                                                                                                                                                                                                                                                                                                                                                                                                                                |
| P <sub>9</sub> V <sub>6</sub> V <sub>9</sub> Q <sub>7</sub> K <sub>7</sub> S <sub>8</sub> S <sub>8</sub> E <sub>8</sub> E <sub>9</sub> N <sub>7</sub> Q <sub>9</sub> S <sub>9</sub> V <sub>12</sub> E <sub>9</sub> K <sub>13</sub> Q <sub>9</sub> V <sub>9</sub> A <sub>9</sub> K <sub>9</sub> P <sub>9</sub> E <sub>9</sub> T <sub>9</sub> T <sub>9</sub> N <sub>9</sub> P <sub>9</sub> Y <sub>9</sub> E <sub>9</sub> H <sub>9</sub> V <sub>10</sub> L <sub>9</sub> V <sub>9</sub> R <sub>9</sub> L <sub>9</sub> G <sub>9</sub> S <sub>9</sub> A <sub>9</sub> H <sub>9</sub> L <sub>9</sub> G <sub>9</sub> T <sub>8</sub><br>K <sub>4</sub> S <sub>4</sub> F <sub>2</sub> E <sub>4</sub> D <sub>3</sub> G <sub>3</sub> Q <sub>3</sub> T <sub>4</sub> V <sub>4</sub> E <sub>4</sub> M <sub>3</sub> Q <sub>4</sub> I <sub>1</sub> A <sub>4</sub> V <sub>4</sub> P <sub>4</sub> E <sub>4</sub> T <sub>2</sub> T <sub>4</sub> N <sub>4</sub> P <sub>4</sub> Y <sub>4</sub> E <sub>4</sub> H <sub>4</sub> V <sub>4</sub> L <sub>4</sub> V <sub>5</sub> R <sub>4</sub> L <sub>4</sub> G <sub>4</sub> S <sub>4</sub> A <sub>4</sub> H <sub>4</sub> L <sub>4</sub> G <sub>4</sub> T <sub>4</sub> S <sub>4</sub> V <sub>4</sub> L <sub>4</sub> N <sub>4</sub><br>V <sub>1</sub> M <sub>2</sub> K <sub>1</sub> S <sub>1</sub> S <sub>2</sub> K <sub>1</sub> E <sub>1</sub> K <sub>1</sub> Q <sub>1</sub> S <sub>2</sub> T <sub>1</sub> E <sub>1</sub> K <sub>1</sub> Q <sub>1</sub> A <sub>1</sub> K <sub>1</sub> V <sub>2</sub> E <sub>1</sub> T <sub>1</sub> T <sub>1</sub> N <sub>1</sub> P <sub>1</sub> Y <sub>1</sub> E <sub>1</sub> H <sub>1</sub> L <sub>1</sub> R <sub>1</sub> L <sub>1</sub> G <sub>1</sub> S <sub>1</sub> A <sub>1</sub> H <sub>1</sub> L <sub>1</sub> G <sub>1</sub> T <sub>1</sub> S <sub>1</sub> S <sub>1</sub><br>K <sub>1</sub> T <sub>1</sub> E <sub>2</sub> D <sub>1</sub> H <sub>1</sub> N <sub>1</sub> D <sub>1</sub> V <sub>1</sub> P <sub>1</sub> V <sub>1</sub><br>L <sub>1</sub> S <sub>1</sub> E <sub>1</sub> L <sub>1</sub><br>Q <sub>1</sub> | S <sub>9</sub> V <sub>9</sub> L <sub>9</sub> N <sub>9</sub> C <sub>9</sub> F <sub>9</sub> F <sub>9</sub> H <sub>9</sub> G <sub>9</sub> S <sub>9</sub> K <sub>9</sub> C <sub>9</sub> V <sub>9</sub> M <sub>9</sub> P <sub>9</sub> Y <sub>9</sub> H <sub>9</sub> L <sub>9</sub> A <sub>9</sub> E <sub>9</sub> N <sub>9</sub> G <sub>9</sub> D <sub>9</sub> A <sub>9</sub> N <sub>9</sub> E <sub>9</sub> S <sub>13</sub> L <sub>9</sub> V <sub>9</sub> M <sub>9</sub> S <sub>9</sub> T <sub>9</sub> T <sub>9</sub> R <sub>9</sub> G <sub>9</sub> Q <sub>9</sub> F <sub>11</sub> D <sub>9</sub> F <sub>9</sub> G <sub>9</sub><br>C <sub>4</sub> F <sub>4</sub> F <sub>4</sub> H <sub>4</sub> G <sub>4</sub> S <sub>4</sub> K <sub>4</sub> C <sub>4</sub> V <sub>4</sub> I <sub>4</sub> P <sub>4</sub> Y <sub>4</sub> H <sub>4</sub> L <sub>4</sub> A <sub>4</sub> E <sub>4</sub> N <sub>4</sub> G <sub>4</sub> D <sub>4</sub> L <sub>4</sub> D <sub>4</sub> K <sub>4</sub> S <sub>4</sub> L <sub>4</sub> I <sub>4</sub> I <sub>4</sub> V <sub>4</sub> T <sub>4</sub> T <sub>4</sub> R <sub>4</sub> G <sub>4</sub> Q <sub>4</sub> F <sub>4</sub> D <sub>4</sub> F <sub>4</sub> G <sub>4</sub> P <sub>4</sub> L <sub>4</sub> K <sub>4</sub> N <sub>4</sub><br>L <sub>1</sub> N <sub>1</sub> C <sub>1</sub> F <sub>1</sub> F <sub>1</sub> H <sub>1</sub> G <sub>1</sub> S <sub>1</sub> K <sub>1</sub> C <sub>1</sub> V <sub>1</sub> M <sub>1</sub> P <sub>1</sub> Y <sub>1</sub> H <sub>1</sub> L <sub>1</sub> A <sub>1</sub> E <sub>1</sub> N <sub>1</sub> G <sub>1</sub> S <sub>1</sub> E <sub>2</sub> N <sub>1</sub> E <sub>1</sub> S <sub>1</sub> L <sub>1</sub> M <sub>1</sub> S <sub>1</sub> T <sub>1</sub> T <sub>1</sub> R <sub>1</sub> G <sub>1</sub> Q <sub>1</sub> D <sub>1</sub> G <sub>1</sub> P <sub>1</sub> L <sub>1</sub><br>A <sub>1</sub> P <sub>1</sub> V <sub>1</sub> | P <sub>9</sub> L <sub>9</sub> K <sub>9</sub> N <sub>9</sub> I <sub>9</sub> K <sub>10</sub> C <sub>9</sub> K <sub>9</sub> K <sub>10</sub> M <sub>9</sub> K <sub>9</sub> D <sub>10</sub> Y <sub>9</sub> D <sub>9</sub> M <sub>9</sub> T <sub>9</sub> V <sub>9</sub> C <sub>9</sub> P <sub>10</sub> L <sub>9</sub> P <sub>9</sub> R <sub>9</sub> D <sub>9</sub> V <sub>9</sub> Q <sub>9</sub> P <sub>9</sub> F <sub>9</sub> R <sub>9</sub> A <sub>9</sub> K <sub>9</sub> I <sub>9</sub> V <sub>9</sub> F <sub>9</sub> R <sub>9</sub> E <sub>9</sub> P <sub>9</sub> K <sub>9</sub> L <sub>9</sub> G <sub>9</sub> E <sub>9</sub><br>I <sub>4</sub> K <sub>4</sub> C <sub>4</sub> K <sub>4</sub> K <sub>4</sub> I <sub>4</sub> K <sub>4</sub> D <sub>4</sub> Y <sub>4</sub> D <sub>4</sub> I <sub>4</sub> V <sub>4</sub> C <sub>4</sub> P <sub>4</sub> L <sub>4</sub> P <sub>5</sub> S <sub>4</sub> D <sub>4</sub> V <sub>4</sub> Q <sub>4</sub> P <sub>4</sub> F <sub>4</sub> S <sub>4</sub> A <sub>4</sub> K <sub>4</sub> M <sub>4</sub> V <sub>4</sub> F <sub>4</sub> S <sub>4</sub> E <sub>4</sub> P <sub>4</sub> K <sub>4</sub> L <sub>4</sub> G <sub>4</sub> E <sub>4</sub> E <sub>4</sub> V <sub>4</sub> V <sub>4</sub> V <sub>5</sub><br>K <sub>1</sub> N <sub>1</sub> I <sub>1</sub> C <sub>1</sub> M <sub>1</sub> Y <sub>1</sub> I <sub>1</sub> T <sub>1</sub> V <sub>1</sub> C <sub>1</sub> L <sub>1</sub> R <sub>1</sub> D <sub>1</sub> V <sub>1</sub> Q <sub>1</sub> P <sub>1</sub> F <sub>1</sub> R <sub>1</sub> A <sub>1</sub> K <sub>1</sub> I <sub>1</sub> V <sub>1</sub> F <sub>1</sub> R <sub>1</sub> E <sub>1</sub> P <sub>1</sub> K <sub>1</sub> L <sub>1</sub> G <sub>1</sub> E <sub>1</sub> E <sub>1</sub><br>M <sub>1</sub> V <sub>1</sub> | E <sub>9</sub> V <sub>10</sub> V <sub>10</sub> V <sub>7</sub> V <sub>9</sub> Y <sub>9</sub> F <sub>9</sub> A <sub>9</sub> S <sub>12</sub> I <sub>13</sub> D <sub>6</sub> G <sub>6</sub> S <sub>7</sub> I <sub>6</sub> V <sub>6</sub> M <sub>6</sub> K <sub>12</sub> V <sub>7</sub> S <sub>9</sub> E <sub>9</sub> K <sub>9</sub> S <sub>11</sub> N <sub>9</sub> T <sub>9</sub> Y <sub>9</sub> Q <sub>9</sub> A <sub>9</sub> G <sub>9</sub> G <sub>9</sub> S <sub>9</sub> F <sub>9</sub> T <sub>12</sub> H <sub>9</sub> L <sub>9</sub> W <sub>9</sub> T <sub>9</sub> Y <sub>9</sub> Q <sub>9</sub> H <sub>9</sub> D <sub>9</sub><br>V <sub>5</sub> C <sub>4</sub> F <sub>4</sub> A <sub>4</sub> S <sub>4</sub> I <sub>4</sub> D <sub>4</sub> G <sub>4</sub> R <sub>4</sub> G <sub>4</sub> V <sub>4</sub> M <sub>4</sub> K <sub>6</sub> V <sub>5</sub> S <sub>4</sub> E <sub>4</sub> S <sub>2</sub> S <sub>4</sub> N <sub>4</sub> T <sub>4</sub> Y <sub>4</sub> T <sub>4</sub> A <sub>4</sub> G <sub>4</sub> G <sub>4</sub> L <sub>4</sub> F <sub>4</sub> T <sub>4</sub> H <sub>4</sub> L <sub>4</sub> W <sub>4</sub> A <sub>4</sub> Y <sub>4</sub> Q <sub>4</sub> Y <sub>4</sub> D <sub>4</sub> G <sub>4</sub> N <sub>4</sub> P <sub>4</sub> G <sub>4</sub><br>F <sub>1</sub> I <sub>2</sub> F <sub>1</sub> A <sub>1</sub> S <sub>1</sub> I <sub>1</sub> N <sub>1</sub> N <sub>3</sub> I <sub>1</sub> V <sub>1</sub> M <sub>1</sub> I <sub>1</sub> A <sub>1</sub> A <sub>2</sub> K <sub>1</sub> S <sub>1</sub> N <sub>1</sub> Y <sub>1</sub> Q <sub>1</sub> A <sub>1</sub> G <sub>1</sub> G <sub>1</sub> S <sub>1</sub> F <sub>1</sub> K <sub>1</sub> H <sub>1</sub> L <sub>1</sub> W <sub>1</sub> T <sub>1</sub> H <sub>2</sub> Q <sub>1</sub> H <sub>1</sub> D <sub>1</sub> F <sub>2</sub> N <sub>1</sub><br>Y <sub>1</sub> Y <sub>1</sub> S <sub>1</sub> A <sub>1</sub> K <sub>1</sub> E <sub>1</sub> S <sub>1</sub> | G <sub>9</sub> N <sub>9</sub> P <sub>9</sub> G <sub>13</sub> D <sub>9</sub> C <sub>9</sub> G <sub>9</sub> G <sub>9</sub> P <sub>9</sub> I <sub>9</sub> V <sub>9</sub> A <sub>9</sub> T <sub>9</sub> S <sub>9</sub> D <sub>9</sub> M <sub>9</sub> K <sub>9</sub> V <sub>9</sub> V <sub>9</sub> G <sub>13</sub> F <sub>9</sub> H <sub>9</sub> S <sub>11</sub> G <sub>9</sub> V <sub>9</sub> V <sub>9</sub> S <sub>9</sub> N <sub>9</sub> G <sub>10</sub> A <sub>9</sub> G <sub>9</sub> E <sub>9</sub> K <sub>9</sub> L <sub>9</sub> R <sub>9</sub> A <sub>9</sub> V <sub>13</sub> Y <sub>9</sub> T <sub>9</sub> P <sub>9</sub><br>D <sub>4</sub> C <sub>4</sub> G <sub>4</sub> C <sub>4</sub> P <sub>4</sub> I <sub>4</sub> V <sub>4</sub> A <sub>4</sub> T <sub>4</sub> S <sub>4</sub> D <sub>4</sub> L <sub>4</sub> K <sub>4</sub> V <sub>4</sub> V <sub>4</sub> G <sub>4</sub> F <sub>4</sub> H <sub>4</sub> S <sub>4</sub> H <sub>1</sub> V <sub>4</sub> V <sub>4</sub> V <sub>1</sub> N <sub>4</sub> G <sub>4</sub> A <sub>4</sub> G <sub>4</sub> E <sub>4</sub> K <sub>4</sub> L <sub>4</sub> R <sub>4</sub> A <sub>4</sub> V <sub>4</sub> Y <sub>4</sub> T <sub>4</sub> P <sub>4</sub> T <sub>1</sub> N <sub>4</sub> Q <sub>4</sub> E <sub>4</sub><br>P <sub>1</sub> G <sub>1</sub> D <sub>1</sub> G <sub>1</sub> G <sub>1</sub> P <sub>1</sub> I <sub>1</sub> V <sub>1</sub> A <sub>1</sub> T <sub>1</sub> S <sub>1</sub> D <sub>1</sub> M <sub>1</sub> I <sub>1</sub> V <sub>1</sub> V <sub>1</sub> G <sub>1</sub> F <sub>1</sub> S <sub>1</sub> G <sub>1</sub> V <sub>1</sub> S <sub>2</sub> E <sub>1</sub> A <sub>1</sub> E <sub>1</sub> K <sub>1</sub> L <sub>1</sub> R <sub>1</sub> A <sub>1</sub> V <sub>1</sub> Y <sub>1</sub> P <sub>1</sub> V <sub>1</sub> N <sub>1</sub><br>K <sub>1</sub> A <sub>1</sub> N <sub>1</sub> | V <sub>9</sub> N <sub>9</sub> H <sub>9</sub> E <sub>9</sub> L <sub>9</sub> I <sub>9</sub> A <sub>9</sub> S <sub>16</sub> L <sub>9</sub> S <sub>9</sub> T <sub>9</sub> E <sub>9</sub> I <sub>9</sub> Q <sub>9</sub> M <sub>9</sub> T <sub>13</sub> D <sub>9</sub> F <sub>9</sub> W <sub>9</sub> T <sub>9</sub> F <sub>9</sub> N <sub>9</sub> P <sub>9</sub> D <sub>9</sub> L <sub>9</sub> V <sub>9</sub> E <sub>9</sub> W <sub>9</sub> N <sub>9</sub> S <sub>9</sub> V <sub>9</sub> A <sub>9</sub> R <sub>9</sub> V <sub>9</sub> S <sub>9</sub> T <sub>9</sub> F <sub>9</sub> F <sub>9</sub> P <sub>9</sub> M <sub>10</sub><br>L <sub>4</sub> I <sub>4</sub> S <sub>4</sub> S <sub>4</sub> V <sub>4</sub> S <sub>4</sub> S <sub>4</sub> E <sub>4</sub> V <sub>4</sub> Q <sub>4</sub> M <sub>4</sub> N <sub>4</sub> D <sub>4</sub> F <sub>4</sub> W <sub>4</sub> F <sub>4</sub> F <sub>4</sub> N <sub>4</sub> P <sub>4</sub> D <sub>2</sub> L <sub>4</sub> V <sub>4</sub> E <sub>4</sub> W <sub>4</sub> N <sub>4</sub> S <sub>4</sub> V <sub>4</sub> A <sub>4</sub> R <sub>4</sub> V <sub>4</sub> S <sub>4</sub> T <sub>4</sub> F <sub>4</sub> F <sub>4</sub> P <sub>4</sub> M <sub>4</sub> Y <sub>4</sub> K <sub>4</sub> A <sub>3</sub> I <sub>3</sub><br>H <sub>1</sub> E <sub>1</sub> L <sub>1</sub> I <sub>1</sub> V <sub>2</sub> T <sub>1</sub> D <sub>1</sub> V <sub>1</sub> T <sub>1</sub> M <sub>1</sub> T <sub>1</sub> D <sub>1</sub> W <sub>1</sub> T <sub>1</sub> F <sub>1</sub> K <sub>1</sub> P <sub>1</sub> D <sub>1</sub> L <sub>1</sub> N <sub>1</sub> E <sub>1</sub> W <sub>1</sub> N <sub>1</sub> S <sub>1</sub> V <sub>1</sub> A <sub>1</sub> R <sub>1</sub> V <sub>1</sub> S <sub>1</sub> T <sub>1</sub> F <sub>1</sub> F <sub>1</sub> S <sub>1</sub> M <sub>1</sub> T <sub>1</sub> K <sub>1</sub><br>K <sub>1</sub> L <sub>1</sub> Q <sub>1</sub> N <sub>1</sub> V <sub>1</sub> P <sub>1</sub> S <sub>1</sub><br>D <sub>1</sub> A <sub>1</sub> | S <sub>9</sub> K <sub>9</sub> A <sub>9</sub> M <sub>9</sub> N <sub>9</sub> A <sub>9</sub> I <sub>9</sub> T <sub>9</sub> V <sub>10</sub> Q <sub>9</sub> V <sub>9</sub> N <sub>9</sub> D <sub>9</sub> G <sub>9</sub> E <sub>9</sub> E <sub>9</sub> S <sub>9</sub> I <sub>9</sub> D <sub>9</sub> G <sub>9</sub> N <sub>9</sub> L <sub>9</sub> M <sub>9</sub> M <sub>9</sub> V <sub>9</sub> G <sub>9</sub> S <sub>9</sub> V <sub>13</sub> N <sub>10</sub> S <sub>9</sub> N <sub>13</sub> V <sub>9</sub> Y <sub>9</sub> H <sub>10</sub> N <sub>9</sub> H <sub>9</sub> V <sub>9</sub> M <sub>9</sub> K <sub>11</sub> G <sub>9</sub><br>N <sub>4</sub> T <sub>4</sub> M <sub>4</sub> T <sub>4</sub> V <sub>4</sub> Q <sub>4</sub> V <sub>5</sub> D <sub>4</sub> D <sub>4</sub> G <sub>4</sub> E <sub>4</sub> E <sub>4</sub> M <sub>4</sub> I <sub>4</sub> D <sub>4</sub> G <sub>4</sub> N <sub>4</sub> L <sub>4</sub> M <sub>4</sub> M <sub>4</sub> V <sub>4</sub> G <sub>4</sub> S <sub>4</sub> V <sub>4</sub> N <sub>4</sub> S <sub>4</sub> T <sub>5</sub> S <sub>1</sub> Y <sub>4</sub> H <sub>4</sub> Y <sub>1</sub> H <sub>5</sub> V <sub>4</sub> M <sub>4</sub> K <sub>4</sub> G <sub>4</sub> K <sub>5</sub> S <sub>4</sub> E <sub>3</sub> S <sub>5</sub><br>A <sub>1</sub> M <sub>1</sub> N <sub>1</sub> A <sub>1</sub> I <sub>1</sub> S <sub>2</sub> Q <sub>1</sub> N <sub>1</sub> D <sub>1</sub> G <sub>1</sub> E <sub>1</sub> E <sub>1</sub> L <sub>1</sub> I <sub>1</sub> L <sub>2</sub> G <sub>1</sub> N <sub>1</sub> L <sub>1</sub> M <sub>1</sub> M <sub>1</sub> V <sub>1</sub> G <sub>1</sub> S <sub>1</sub> V <sub>1</sub> N <sub>1</sub> V <sub>1</sub> N <sub>1</sub> V <sub>1</sub> M <sub>1</sub> G <sub>1</sub><br>N <sub>1</sub> D <sub>1</sub> D <sub>1</sub> | K <sub>9</sub> S <sub>10</sub> E <sub>8</sub> S <sub>9</sub> F <sub>9</sub> V <sub>9</sub> R <sub>9</sub> Y <sub>9</sub> C <sub>9</sub> E <sub>9</sub> Q <sub>9</sub> F <sub>9</sub> P <sub>9</sub> K <sub>9</sub> S <sub>9</sub> A <sub>9</sub> F <sub>9</sub> T <sub>9</sub> P <sub>9</sub> E <sub>9</sub> L <sub>9</sub> S <sub>9</sub> D <sub>9</sub> Q <sub>9</sub> Y <sub>9</sub> L <sub>12</sub> P <sub>9</sub> S <sub>9</sub> I <sub>9</sub> L <sub>9</sub> S <sub>9</sub> K <sub>9</sub> P <sub>9</sub> A <sub>9</sub> F <sub>9</sub> S <sub>9</sub> K <sub>11</sub> G <sub>9</sub> L <sub>9</sub> L <sub>9</sub><br>F <sub>4</sub> V <sub>4</sub> R <sub>4</sub> Y <sub>4</sub> C <sub>4</sub> E <sub>3</sub> Q <sub>3</sub> F <sub>4</sub> P <sub>4</sub> H <sub>3</sub> S <sub>4</sub> A <sub>4</sub> F <sub>4</sub> V <sub>4</sub> P <sub>4</sub> E <sub>4</sub> L <sub>4</sub> S <sub>4</sub> D <sub>2</sub> K <sub>3</sub> Y <sub>4</sub> L <sub>4</sub> P <sub>4</sub> S <sub>4</sub> I <sub>3</sub> S <sub>1</sub> S <sub>4</sub> K <sub>4</sub> P <sub>4</sub> A <sub>4</sub> F <sub>4</sub> R <sub>4</sub> K <sub>4</sub> G <sub>4</sub> L <sub>4</sub> L <sub>4</sub> L <sub>1</sub> Y <sub>4</sub> N <sub>4</sub> E <sub>4</sub><br>E <sub>1</sub> F <sub>1</sub> V <sub>1</sub> R <sub>1</sub> Y <sub>1</sub> C <sub>1</sub> E <sub>1</sub> Q <sub>1</sub> F <sub>1</sub> P <sub>1</sub> K <sub>1</sub> S <sub>1</sub> A <sub>1</sub> F <sub>1</sub> M <sub>1</sub> P <sub>1</sub> E <sub>1</sub> N <sub>2</sub> S <sub>2</sub> D <sub>1</sub> Q <sub>1</sub> G <sub>1</sub> L <sub>1</sub> P <sub>1</sub> I <sub>1</sub> L <sub>1</sub> S <sub>1</sub> K <sub>1</sub> P <sub>1</sub> A <sub>1</sub> F <sub>1</sub> S <sub>1</sub> K <sub>1</sub> G <sub>1</sub> L <sub>1</sub> K <sub>1</sub> Y <sub>1</sub><br>Q <sub>1</sub> N <sub>1</sub> N <sub>1</sub> L <sub>1</sub> Y <sub>1</sub> V <sub>1</sub> | K <sub>9</sub> Y <sub>9</sub> N <sub>9</sub> E <sub>9</sub> P <sub>9</sub> V <sub>10</sub> R <sub>9</sub> V <sub>9</sub> G <sub>9</sub> L <sub>7</sub> V <sub>9</sub> N <sub>9</sub> F <sub>9</sub> E <sub>9</sub> C <sub>9</sub> L <sub>9</sub> V <sub>7</sub> K <sub>5</sub> A <sub>9</sub> Y <sub>9</sub> L <sub>9</sub> V <sub>9</sub> V <sub>9</sub> E <sub>13</sub> K <sub>9</sub> K <sub>9</sub> L <sub>9</sub> E <sub>9</sub> E <sub>9</sub> L <sub>9</sub> G <sub>9</sub> F <sub>9</sub> M <sub>9</sub> G <sub>9</sub> N <sub>9</sub> S <sub>9</sub> G <sub>9</sub> P <sub>13</sub> Q <sub>9</sub> W <sub>9</sub><br>P <sub>4</sub> V <sub>4</sub> K <sub>4</sub> V <sub>5</sub> G <sub>4</sub> F <sub>4</sub> V <sub>4</sub> N <sub>4</sub> Y <sub>4</sub> E <sub>4</sub> C <sub>4</sub> L <sub>4</sub> I <sub>4</sub> K <sub>2</sub> A <sub>4</sub> Y <sub>4</sub> L <sub>4</sub> V <sub>4</sub> I <sub>4</sub> E <sub>4</sub> K <sub>1</sub> K <sub>1</sub> L <sub>4</sub> K <sub>1</sub> E <sub>3</sub> L <sub>4</sub> E <sub>4</sub> F <sub>4</sub> R <sub>2</sub> G <sub>4</sub> N <sub>4</sub> S <sub>1</sub> G <sub>4</sub> P <sub>4</sub> E <sub>4</sub> W <sub>4</sub> D <sub>4</sub> W <sub>1</sub> M <sub>4</sub> E <sub>4</sub><br>N <sub>1</sub> E <sub>1</sub> P <sub>1</sub> R <sub>1</sub> G <sub>1</sub> L <sub>1</sub> V <sub>1</sub> S <sub>2</sub> F <sub>1</sub> E <sub>1</sub> C <sub>1</sub> S <sub>2</sub> V <sub>1</sub> K <sub>1</sub> M <sub>2</sub> S <sub>2</sub> L <sub>1</sub> V <sub>1</sub> S <sub>1</sub> E <sub>1</sub> K <sub>1</sub> D <sub>1</sub> E <sub>1</sub> G <sub>1</sub> L <sub>1</sub> H <sub>1</sub> F <sub>1</sub> E <sub>1</sub> G <sub>1</sub> N <sub>1</sub> S <sub>1</sub> G <sub>1</sub> P <sub>1</sub> Q <sub>1</sub> D <sub>1</sub> P <sub>1</sub><br>N <sub>1</sub> L <sub>1</sub> A <sub>1</sub> Y <sub>1</sub> V <sub>1</sub> L <sub>1</sub> G <sub>1</sub> V <sub>1</sub> C <sub>1</sub> |

| 1925                                                                                                                                                                                                                                                                                                                                                                                                                                                                                                                                                                                                                                                                                                                                                                                                                                                                                                                                                                                                                                                                                                                                                                                                                                                                                                                                                                                                                                                                                                                                                                                                                                                                                                                                                                                                                                                                   | 1930                                                                                                                                                                                                                                                                                                                                                                                                                                                                                                                                                                                                                                                                                                                                                                                                                                                                                                                                                                                                                                                                                                                                                                                                                                                                                                                                                                                                                                                                                                                                                                                                                                                                                                                                                                                         | 1935                                                                                                                                                                                                                                                                                                                                                                                                                                                                                                                                                                                                                                                                                                                                                                                                                                                                                                                                                                                                                                                                                                                                                                                                                                                                                                                                                                                                                                                                                                                                                                                                                                                                                                                                                                                                        | 1940                                                                                                                                                                                                                                                                                                                                                                                                                                                                                                                                                                                                                                                                                                                                                                                                                                                                                                                                                                                                                                                                                                                                                                                                                                                                                                                                                                                                                                                                                                                                                                                                                                                                                                                                                                                                                                                                  | 1945                                                                                                                                                                                                                                                                                                                                                                                                                                                                                                                                                                                                                                                                                                                                                                                                                                                                                                                                                                                                                                                                                                                                                                                                                                                                                                                                                                                                                                                                                                                                                                                                                                                                                                                                                                                                                                                                                                 | 1950                                                                                                                                                                                                                                                                                                                                                                                                                                                                                                                                                                                                                                                                                                                                                                                                                                                                                                                                                                                                                                                                                                                                                                                                                                                                                                                                                                                                                                                                                                                                                                                                                                                                                                                                                                                                                                                   | 1955                                                                                                                                                                                                                                                                                                                                                                                                                                                                                                                                                                                                                                                                                                                                                                                                                                                                                                                                                                                                                                                                                                                                                                                                                                                                                                                                                                                                                                                                                                                                                                                                                                                                                                                                                                                                                                                   | 1960                                                                                                                                                                                                                                                                                                                                                                                                                                                                                                                                                                                                                                                                                                                                                                                                                                                                                                                                                                                                                                                                                                                                                                                                                                                                                                                                                                                                                                                                                                                                                                                                                                                                                                                                                                                                                                                                                                   |                                                                                                                                                                                                                                                                                                                                                                                                                                                                                                                                                                                                                                                                                                                                                                                                                                                                                                                                                                                                                                                                                                                                                                                                                                                                                                                                                                                                                                                                                                                                                                                                                                                                                                                                                                                                                                                                                                                                  |
|------------------------------------------------------------------------------------------------------------------------------------------------------------------------------------------------------------------------------------------------------------------------------------------------------------------------------------------------------------------------------------------------------------------------------------------------------------------------------------------------------------------------------------------------------------------------------------------------------------------------------------------------------------------------------------------------------------------------------------------------------------------------------------------------------------------------------------------------------------------------------------------------------------------------------------------------------------------------------------------------------------------------------------------------------------------------------------------------------------------------------------------------------------------------------------------------------------------------------------------------------------------------------------------------------------------------------------------------------------------------------------------------------------------------------------------------------------------------------------------------------------------------------------------------------------------------------------------------------------------------------------------------------------------------------------------------------------------------------------------------------------------------------------------------------------------------------------------------------------------------|----------------------------------------------------------------------------------------------------------------------------------------------------------------------------------------------------------------------------------------------------------------------------------------------------------------------------------------------------------------------------------------------------------------------------------------------------------------------------------------------------------------------------------------------------------------------------------------------------------------------------------------------------------------------------------------------------------------------------------------------------------------------------------------------------------------------------------------------------------------------------------------------------------------------------------------------------------------------------------------------------------------------------------------------------------------------------------------------------------------------------------------------------------------------------------------------------------------------------------------------------------------------------------------------------------------------------------------------------------------------------------------------------------------------------------------------------------------------------------------------------------------------------------------------------------------------------------------------------------------------------------------------------------------------------------------------------------------------------------------------------------------------------------------------|-------------------------------------------------------------------------------------------------------------------------------------------------------------------------------------------------------------------------------------------------------------------------------------------------------------------------------------------------------------------------------------------------------------------------------------------------------------------------------------------------------------------------------------------------------------------------------------------------------------------------------------------------------------------------------------------------------------------------------------------------------------------------------------------------------------------------------------------------------------------------------------------------------------------------------------------------------------------------------------------------------------------------------------------------------------------------------------------------------------------------------------------------------------------------------------------------------------------------------------------------------------------------------------------------------------------------------------------------------------------------------------------------------------------------------------------------------------------------------------------------------------------------------------------------------------------------------------------------------------------------------------------------------------------------------------------------------------------------------------------------------------------------------------------------------------|-----------------------------------------------------------------------------------------------------------------------------------------------------------------------------------------------------------------------------------------------------------------------------------------------------------------------------------------------------------------------------------------------------------------------------------------------------------------------------------------------------------------------------------------------------------------------------------------------------------------------------------------------------------------------------------------------------------------------------------------------------------------------------------------------------------------------------------------------------------------------------------------------------------------------------------------------------------------------------------------------------------------------------------------------------------------------------------------------------------------------------------------------------------------------------------------------------------------------------------------------------------------------------------------------------------------------------------------------------------------------------------------------------------------------------------------------------------------------------------------------------------------------------------------------------------------------------------------------------------------------------------------------------------------------------------------------------------------------------------------------------------------------------------------------------------------------------------------------------------------------|------------------------------------------------------------------------------------------------------------------------------------------------------------------------------------------------------------------------------------------------------------------------------------------------------------------------------------------------------------------------------------------------------------------------------------------------------------------------------------------------------------------------------------------------------------------------------------------------------------------------------------------------------------------------------------------------------------------------------------------------------------------------------------------------------------------------------------------------------------------------------------------------------------------------------------------------------------------------------------------------------------------------------------------------------------------------------------------------------------------------------------------------------------------------------------------------------------------------------------------------------------------------------------------------------------------------------------------------------------------------------------------------------------------------------------------------------------------------------------------------------------------------------------------------------------------------------------------------------------------------------------------------------------------------------------------------------------------------------------------------------------------------------------------------------------------------------------------------------------------------------------------------------|--------------------------------------------------------------------------------------------------------------------------------------------------------------------------------------------------------------------------------------------------------------------------------------------------------------------------------------------------------------------------------------------------------------------------------------------------------------------------------------------------------------------------------------------------------------------------------------------------------------------------------------------------------------------------------------------------------------------------------------------------------------------------------------------------------------------------------------------------------------------------------------------------------------------------------------------------------------------------------------------------------------------------------------------------------------------------------------------------------------------------------------------------------------------------------------------------------------------------------------------------------------------------------------------------------------------------------------------------------------------------------------------------------------------------------------------------------------------------------------------------------------------------------------------------------------------------------------------------------------------------------------------------------------------------------------------------------------------------------------------------------------------------------------------------------------------------------------------------------|--------------------------------------------------------------------------------------------------------------------------------------------------------------------------------------------------------------------------------------------------------------------------------------------------------------------------------------------------------------------------------------------------------------------------------------------------------------------------------------------------------------------------------------------------------------------------------------------------------------------------------------------------------------------------------------------------------------------------------------------------------------------------------------------------------------------------------------------------------------------------------------------------------------------------------------------------------------------------------------------------------------------------------------------------------------------------------------------------------------------------------------------------------------------------------------------------------------------------------------------------------------------------------------------------------------------------------------------------------------------------------------------------------------------------------------------------------------------------------------------------------------------------------------------------------------------------------------------------------------------------------------------------------------------------------------------------------------------------------------------------------------------------------------------------------------------------------------------------------|--------------------------------------------------------------------------------------------------------------------------------------------------------------------------------------------------------------------------------------------------------------------------------------------------------------------------------------------------------------------------------------------------------------------------------------------------------------------------------------------------------------------------------------------------------------------------------------------------------------------------------------------------------------------------------------------------------------------------------------------------------------------------------------------------------------------------------------------------------------------------------------------------------------------------------------------------------------------------------------------------------------------------------------------------------------------------------------------------------------------------------------------------------------------------------------------------------------------------------------------------------------------------------------------------------------------------------------------------------------------------------------------------------------------------------------------------------------------------------------------------------------------------------------------------------------------------------------------------------------------------------------------------------------------------------------------------------------------------------------------------------------------------------------------------------------------------------------------------------------------------------------------------------|----------------------------------------------------------------------------------------------------------------------------------------------------------------------------------------------------------------------------------------------------------------------------------------------------------------------------------------------------------------------------------------------------------------------------------------------------------------------------------------------------------------------------------------------------------------------------------------------------------------------------------------------------------------------------------------------------------------------------------------------------------------------------------------------------------------------------------------------------------------------------------------------------------------------------------------------------------------------------------------------------------------------------------------------------------------------------------------------------------------------------------------------------------------------------------------------------------------------------------------------------------------------------------------------------------------------------------------------------------------------------------------------------------------------------------------------------------------------------------------------------------------------------------------------------------------------------------------------------------------------------------------------------------------------------------------------------------------------------------------------------------------------------------------------------------------------------------------------------------------------------------------------------------------------------------|
| D <sub>9</sub> P <sub>9</sub> M <sub>9</sub> E <sub>9</sub> I <sub>9</sub> L <sub>9</sub> S <sub>9</sub> D <sub>9</sub> L <sub>9</sub> N <sub>9</sub> K <sub>9</sub> K <sub>9</sub> A <sub>13</sub> A <sub>9</sub> M <sub>9</sub> G <sub>9</sub> A <sub>9</sub> L <sub>9</sub> Y <sub>9</sub> Q <sub>1</sub> G <sub>9</sub> S <sub>9</sub> K <sub>9</sub> Q <sub>9</sub> D <sub>9</sub> W <sub>9</sub> L <sub>9</sub> K <sub>9</sub> S <sub>9</sub> M <sub>9</sub> T <sub>9</sub> P <sub>9</sub> E <sub>9</sub> E <sub>9</sub> F <sub>9</sub> I <sub>9</sub> M <sub>9</sub> S <sub>13</sub> V <sub>9</sub> R <sub>9</sub><br>I <sub>4</sub> L <sub>4</sub> S <sub>4</sub> D <sub>4</sub> L <sub>4</sub> N <sub>4</sub> K <sub>4</sub> K <sub>4</sub> A <sub>4</sub> A <sub>4</sub> M <sub>4</sub> G <sub>4</sub> M <sub>4</sub> L <sub>4</sub> Y <sub>4</sub> Q <sub>4</sub> G <sub>4</sub> S <sub>4</sub> K <sub>4</sub> S <sub>1</sub> D <sub>4</sub> W <sub>4</sub> L <sub>4</sub> K <sub>4</sub> S <sub>4</sub> M <sub>4</sub> S <sub>4</sub> P <sub>4</sub> E <sub>4</sub> D <sub>4</sub> F <sub>4</sub> V <sub>4</sub> V <sub>4</sub> S <sub>4</sub> V <sub>4</sub> R <sub>4</sub> V <sub>4</sub> R <sub>4</sub> F <sub>4</sub> K <sub>4</sub><br>M <sub>1</sub> E <sub>1</sub> I <sub>1</sub> L <sub>1</sub> N <sub>1</sub> D <sub>1</sub> N <sub>1</sub> N <sub>1</sub> K <sub>1</sub> K <sub>1</sub> A <sub>1</sub> A <sub>1</sub> G <sub>1</sub> A <sub>1</sub> L <sub>1</sub> Y <sub>1</sub> Q <sub>1</sub> G <sub>1</sub> K <sub>1</sub> Q <sub>1</sub> D <sub>1</sub> W <sub>1</sub> L <sub>1</sub> K <sub>1</sub> M <sub>1</sub> T <sub>1</sub> P <sub>1</sub> E <sub>1</sub> I <sub>1</sub> F <sub>1</sub> I <sub>1</sub> S <sub>1</sub> E <sub>1</sub> A <sub>1</sub><br>N <sub>1</sub> D <sub>1</sub> E <sub>1</sub> A <sub>1</sub><br>L <sub>1</sub> | E <sub>9</sub> S <sub>9</sub> F <sub>9</sub> K <sub>9</sub> H <sub>9</sub> L <sub>9</sub> A <sub>9</sub> G <sub>10</sub> G <sub>9</sub> D <sub>9</sub> V <sub>9</sub> G <sub>13</sub> I <sub>9</sub> W <sub>9</sub> S <sub>10</sub> G <sub>9</sub> S <sub>9</sub> L <sub>13</sub> K <sub>9</sub> A <sub>9</sub> E <sub>9</sub> L <sub>9</sub> R <sub>9</sub> P <sub>9</sub> V <sub>9</sub> E <sub>13</sub> K <sub>9</sub> V <sub>9</sub> S <sub>9</sub> E <sub>9</sub> M <sub>9</sub> K <sub>9</sub> T <sub>13</sub> R <sub>9</sub> V <sub>9</sub> F <sub>9</sub> T <sub>9</sub> G <sub>9</sub> A <sub>9</sub> P <sub>9</sub><br>H <sub>4</sub> L <sub>4</sub> A <sub>4</sub> G <sub>4</sub> G <sub>4</sub> D <sub>4</sub> V <sub>4</sub> D <sub>1</sub> I <sub>4</sub> W <sub>4</sub> S <sub>4</sub> W <sub>1</sub> S <sub>4</sub> L <sub>4</sub> K <sub>4</sub> A <sub>4</sub> E <sub>4</sub> A <sub>4</sub> S <sub>4</sub> P <sub>3</sub> C <sub>2</sub> E <sub>4</sub> K <sub>4</sub> V <sub>4</sub> K <sub>5</sub> V <sub>1</sub> M <sub>4</sub> K <sub>4</sub> T <sub>4</sub> S <sub>4</sub> V <sub>4</sub> F <sub>4</sub> V <sub>1</sub> G <sub>4</sub> A <sub>4</sub> P <sub>4</sub> V <sub>4</sub> D <sub>4</sub> V <sub>5</sub> L <sub>4</sub><br>F <sub>1</sub> K <sub>1</sub> H <sub>1</sub> L <sub>1</sub> A <sub>1</sub> G <sub>1</sub> G <sub>1</sub> V <sub>1</sub> G <sub>1</sub> I <sub>1</sub> G <sub>1</sub> L <sub>1</sub> K <sub>1</sub> E <sub>1</sub> L <sub>1</sub> R <sub>2</sub> P <sub>1</sub> V <sub>1</sub> E <sub>1</sub> S <sub>1</sub> D <sub>1</sub> M <sub>1</sub> K <sub>1</sub> T <sub>1</sub> R <sub>1</sub> F <sub>1</sub> T <sub>1</sub> G <sub>1</sub> A <sub>1</sub> P <sub>1</sub> D <sub>1</sub><br>I <sub>1</sub> T <sub>1</sub> Y <sub>1</sub> | V <sub>10</sub> D <sub>9</sub> V <sub>9</sub> L <sub>9</sub> L <sub>9</sub> G <sub>9</sub> K <sub>9</sub> V <sub>16</sub> L <sub>9</sub> V <sub>9</sub> D <sub>9</sub> N <sub>10</sub> F <sub>13</sub> N <sub>9</sub> H <sub>9</sub> H <sub>9</sub> F <sub>9</sub> Y <sub>9</sub> E <sub>9</sub> N <sub>9</sub> H <sub>9</sub> L <sub>9</sub> K <sub>9</sub> G <sub>9</sub> P <sub>9</sub> W <sub>9</sub> T <sub>9</sub> V <sub>9</sub> G <sub>9</sub> M <sub>9</sub> N <sub>9</sub> K <sub>9</sub> F <sub>9</sub> N <sub>10</sub> S <sub>10</sub> G <sub>9</sub> W <sub>9</sub> D <sub>9</sub> S <sub>9</sub><br>L <sub>3</sub> G <sub>4</sub> G <sub>4</sub> K <sub>4</sub> I <sub>4</sub> L <sub>4</sub> V <sub>4</sub> D <sub>4</sub> N <sub>4</sub> F <sub>4</sub> N <sub>4</sub> H <sub>4</sub> H <sub>4</sub> H <sub>4</sub> Y <sub>4</sub> E <sub>4</sub> N <sub>4</sub> H <sub>4</sub> L <sub>4</sub> K <sub>4</sub> G <sub>4</sub> P <sub>4</sub> W <sub>4</sub> T <sub>4</sub> V <sub>4</sub> G <sub>4</sub> I <sub>4</sub> N <sub>4</sub> K <sub>4</sub> F <sub>4</sub> N <sub>4</sub> R <sub>4</sub> G <sub>4</sub> W <sub>4</sub> D <sub>3</sub> K <sub>4</sub> L <sub>4</sub> A <sub>4</sub> S <sub>3</sub> Y <sub>4</sub><br>L <sub>1</sub> L <sub>1</sub> G <sub>1</sub> G <sub>1</sub> K <sub>1</sub> L <sub>1</sub> D <sub>1</sub> F <sub>1</sub> Y <sub>1</sub> H <sub>1</sub> F <sub>1</sub> Y <sub>1</sub> E <sub>1</sub> N <sub>1</sub> H <sub>1</sub> L <sub>1</sub> K <sub>1</sub> G <sub>1</sub> P <sub>1</sub> W <sub>1</sub> T <sub>1</sub> V <sub>1</sub> G <sub>1</sub> M <sub>1</sub> N <sub>1</sub> K <sub>1</sub> F <sub>1</sub> N <sub>1</sub> S <sub>1</sub> G <sub>1</sub> W <sub>1</sub> D <sub>1</sub> S <sub>1</sub> E <sub>1</sub> A <sub>1</sub><br>L <sub>1</sub> | L <sub>9</sub> A <sub>9</sub> S <sub>9</sub> Y <sub>9</sub> F <sub>9</sub> N <sub>13</sub> H <sub>9</sub> G <sub>9</sub> W <sub>9</sub> N <sub>9</sub> F <sub>9</sub> I <sub>9</sub> D <sub>10</sub> C <sub>9</sub> D <sub>9</sub> G <sub>9</sub> S <sub>9</sub> R <sub>9</sub> F <sub>9</sub> D <sub>9</sub> T <sub>9</sub> S <sub>9</sub> L <sub>13</sub> A <sub>9</sub> P <sub>9</sub> M <sub>9</sub> L <sub>9</sub> F <sub>9</sub> Q <sub>9</sub> L <sub>9</sub> I <sub>9</sub> C <sub>9</sub> H <sub>9</sub> M <sub>9</sub> S <sub>10</sub> E <sub>9</sub> S <sub>9</sub> F <sub>9</sub> G <sub>9</sub> E <sub>9</sub><br>F <sub>4</sub> D <sub>2</sub> H <sub>4</sub> S <sub>4</sub> W <sub>4</sub> D <sub>1</sub> F <sub>4</sub> I <sub>4</sub> D <sub>4</sub> C <sub>4</sub> D <sub>5</sub> G <sub>4</sub> S <sub>4</sub> R <sub>4</sub> F <sub>4</sub> D <sub>4</sub> T <sub>4</sub> S <sub>4</sub> L <sub>4</sub> A <sub>4</sub> P <sub>4</sub> M <sub>4</sub> P <sub>1</sub> F <sub>4</sub> Q <sub>4</sub> L <sub>4</sub> V <sub>4</sub> C <sub>4</sub> H <sub>4</sub> M <sub>4</sub> S <sub>4</sub> E <sub>4</sub> S <sub>5</sub> F <sub>4</sub> G <sub>4</sub> G <sub>4</sub> F <sub>4</sub> D <sub>4</sub> A <sub>4</sub> M <sub>4</sub><br>S <sub>1</sub> N <sub>2</sub> F <sub>1</sub> N <sub>1</sub> H <sub>1</sub> W <sub>1</sub> N <sub>1</sub> F <sub>1</sub> I <sub>1</sub> C <sub>1</sub> G <sub>1</sub> S <sub>1</sub> R <sub>1</sub> F <sub>1</sub> D <sub>1</sub> T <sub>1</sub> S <sub>1</sub> L <sub>1</sub> A <sub>1</sub> M <sub>1</sub> L <sub>1</sub> F <sub>1</sub> Q <sub>1</sub> L <sub>1</sub> I <sub>1</sub> C <sub>1</sub> V <sub>2</sub> M <sub>1</sub> E <sub>1</sub> F <sub>1</sub> G <sub>1</sub> E <sub>1</sub> F <sub>1</sub> G <sub>1</sub><br>Y <sub>1</sub> M <sub>1</sub> V <sub>1</sub> H <sub>1</sub> D <sub>1</sub> | F <sub>9</sub> D <sub>9</sub> N <sub>9</sub> I <sub>9</sub> E <sub>9</sub> T <sub>9</sub> I <sub>6</sub> A <sub>9</sub> L <sub>9</sub> S <sub>9</sub> N <sub>9</sub> L <sub>9</sub> Y <sub>9</sub> T <sub>9</sub> Q <sub>9</sub> I <sub>9</sub> V <sub>9</sub> Y <sub>9</sub> T <sub>13</sub> P <sub>9</sub> I <sub>9</sub> L <sub>9</sub> T <sub>9</sub> I <sub>13</sub> D <sub>9</sub> G <sub>9</sub> Y <sub>9</sub> M <sub>9</sub> T <sub>9</sub> K <sub>9</sub> K <sub>9</sub> H <sub>9</sub> S <sub>13</sub> G <sub>13</sub> N <sub>9</sub> N <sub>9</sub> S <sub>13</sub> G <sub>9</sub> Q <sub>9</sub> P <sub>9</sub><br>E <sub>4</sub> T <sub>4</sub> S <sub>4</sub> A <sub>4</sub> L <sub>4</sub> S <sub>4</sub> N <sub>4</sub> L <sub>4</sub> Y <sub>4</sub> T <sub>4</sub> Q <sub>4</sub> I <sub>4</sub> V <sub>4</sub> Y <sub>4</sub> T <sub>4</sub> P <sub>4</sub> I <sub>4</sub> L <sub>4</sub> I <sub>4</sub> I <sub>4</sub> D <sub>4</sub> G <sub>4</sub> Y <sub>4</sub> G <sub>1</sub> T <sub>3</sub> K <sub>4</sub> K <sub>4</sub> H <sub>4</sub> S <sub>4</sub> G <sub>4</sub> N <sub>4</sub> N <sub>4</sub> N <sub>4</sub> N <sub>4</sub> Q <sub>4</sub> P <sub>4</sub> Q <sub>1</sub> T <sub>4</sub> V <sub>4</sub> V <sub>4</sub><br>N <sub>1</sub> I <sub>1</sub> A <sub>1</sub> V <sub>1</sub> I <sub>1</sub> A <sub>1</sub> V <sub>2</sub> S <sub>1</sub> M <sub>1</sub> L <sub>1</sub> Y <sub>1</sub> T <sub>1</sub> Q <sub>1</sub> I <sub>1</sub> V <sub>1</sub> Y <sub>1</sub> T <sub>1</sub> P <sub>1</sub> L <sub>1</sub> T <sub>1</sub> I <sub>1</sub> D <sub>1</sub> F <sub>1</sub> M <sub>1</sub> T <sub>1</sub> K <sub>1</sub> K <sub>1</sub> H <sub>1</sub> S <sub>1</sub> G <sub>1</sub> S <sub>1</sub> G <sub>1</sub> P <sub>1</sub> S <sub>1</sub> T <sub>1</sub><br>E <sub>1</sub> T <sub>1</sub> A <sub>1</sub> N <sub>1</sub> A <sub>1</sub> A <sub>1</sub> | S <sub>9</sub> T <sub>9</sub> V <sub>9</sub> V <sub>9</sub> D <sub>9</sub> N <sub>9</sub> T <sub>9</sub> M <sub>9</sub> I <sub>9</sub> L <sub>9</sub> M <sub>9</sub> I <sub>9</sub> V <sub>9</sub> V <sub>9</sub> E <sub>13</sub> Y <sub>9</sub> C <sub>9</sub> S <sub>9</sub> E <sub>9</sub> V <sub>9</sub> L <sub>9</sub> S <sub>6</sub> Q <sub>9</sub> E <sub>9</sub> G <sub>9</sub> V <sub>8</sub> S <sub>9</sub> M <sub>9</sub> K <sub>10</sub> Y <sub>10</sub> K <sub>9</sub> Y <sub>9</sub> M <sub>9</sub> C <sub>9</sub> N <sub>9</sub> G <sub>9</sub> D <sub>9</sub> D <sub>9</sub> L <sub>10</sub> I <sub>9</sub><br>D <sub>4</sub> N <sub>4</sub> T <sub>4</sub> M <sub>4</sub> I <sub>4</sub> L <sub>4</sub> M <sub>4</sub> I <sub>4</sub> V <sub>4</sub> V <sub>4</sub> E <sub>4</sub> Y <sub>4</sub> C <sub>4</sub> S <sub>4</sub> C <sub>1</sub> V <sub>4</sub> M <sub>4</sub> A <sub>4</sub> H <sub>4</sub> E <sub>4</sub> G <sub>4</sub> I <sub>4</sub> E <sub>4</sub> M <sub>4</sub> K <sub>4</sub> Y <sub>4</sub> K <sub>5</sub> Y <sub>4</sub> M <sub>4</sub> C <sub>4</sub> N <sub>4</sub> G <sub>4</sub> D <sub>4</sub> D <sub>4</sub> L <sub>4</sub> I <sub>4</sub> L <sub>5</sub> N <sub>4</sub> A <sub>4</sub> P <sub>4</sub><br>V <sub>1</sub> V <sub>1</sub> D <sub>1</sub> N <sub>1</sub> T <sub>1</sub> M <sub>1</sub> I <sub>1</sub> L <sub>1</sub> M <sub>1</sub> I <sub>1</sub> V <sub>1</sub> V <sub>1</sub> E <sub>1</sub> Y <sub>1</sub> S <sub>1</sub> E <sub>1</sub> V <sub>1</sub> L <sub>1</sub> S <sub>1</sub> Q <sub>1</sub> L <sub>1</sub> G <sub>1</sub> V <sub>1</sub> S <sub>2</sub> F <sub>1</sub> S <sub>2</sub> C <sub>1</sub> N <sub>1</sub> G <sub>1</sub> D <sub>1</sub> D <sub>1</sub> I <sub>1</sub> V <sub>1</sub> N <sub>1</sub><br>E <sub>1</sub> I <sub>1</sub> M <sub>1</sub> V <sub>1</sub> | L <sub>9</sub> N <sub>9</sub> A <sub>9</sub> P <sub>9</sub> D <sub>9</sub> D <sub>9</sub> E <sub>9</sub> I <sub>10</sub> P <sub>9</sub> I <sub>9</sub> I <sub>9</sub> Q <sub>9</sub> S <sub>10</sub> R <sub>9</sub> F <sub>13</sub> K <sub>9</sub> D <sub>7</sub> L <sub>9</sub> F <sub>9</sub> A <sub>9</sub> E <sub>9</sub> C <sub>9</sub> G <sub>9</sub> L <sub>9</sub> N <sub>9</sub> Y <sub>9</sub> D <sub>10</sub> F <sub>9</sub> D <sub>9</sub> V <sub>9</sub> H <sub>9</sub> K <sub>9</sub> S <sub>9</sub> I <sub>9</sub> E <sub>9</sub> T <sub>9</sub> I <sub>9</sub> E <sub>9</sub> Y <sub>9</sub><br>D <sub>4</sub> E <sub>4</sub> E <sub>4</sub> I <sub>4</sub> P <sub>4</sub> M <sub>4</sub> I <sub>4</sub> Q <sub>4</sub> S <sub>4</sub> R <sub>4</sub> F <sub>4</sub> K <sub>4</sub> N <sub>4</sub> L <sub>4</sub> D <sub>1</sub> A <sub>4</sub> E <sub>4</sub> C <sub>4</sub> G <sub>4</sub> L <sub>4</sub> N <sub>4</sub> Y <sub>4</sub> D <sub>4</sub> F <sub>4</sub> D <sub>5</sub> D <sub>4</sub> V <sub>4</sub> H <sub>4</sub> K <sub>4</sub> E <sub>2</sub> M <sub>4</sub> D <sub>3</sub> T <sub>4</sub> M <sub>4</sub> E <sub>4</sub> Y <sub>4</sub> M <sub>4</sub> S <sub>4</sub> H <sub>4</sub> S <sub>5</sub><br>A <sub>1</sub> P <sub>1</sub> D <sub>1</sub> V <sub>1</sub> E <sub>1</sub> I <sub>1</sub> P <sub>1</sub> I <sub>1</sub> Q <sub>1</sub> S <sub>1</sub> R <sub>1</sub> F <sub>1</sub> K <sub>1</sub> L <sub>1</sub> S <sub>1</sub> A <sub>1</sub> E <sub>1</sub> C <sub>1</sub> G <sub>1</sub> L <sub>1</sub> N <sub>1</sub> Y <sub>1</sub> F <sub>1</sub> D <sub>1</sub> V <sub>1</sub> H <sub>1</sub> K <sub>1</sub> S <sub>2</sub> I <sub>1</sub> E <sub>1</sub> T <sub>1</sub> M <sub>1</sub> E <sub>1</sub> Y <sub>1</sub> M <sub>1</sub><br>D <sub>1</sub> F <sub>1</sub> K <sub>1</sub> S <sub>1</sub> | M <sub>9</sub> S <sub>10</sub> H <sub>9</sub> S <sub>12</sub> F <sub>9</sub> A <sub>9</sub> Q <sub>9</sub> R <sub>9</sub> D <sub>8</sub> G <sub>9</sub> F <sub>9</sub> F <sub>7</sub> I <sub>9</sub> P <sub>9</sub> K <sub>10</sub> L <sub>9</sub> K <sub>9</sub> K <sub>9</sub> E <sub>8</sub> S <sub>9</sub> I <sub>6</sub> M <sub>6</sub> A <sub>9</sub> I <sub>7</sub> L <sub>9</sub> E <sub>10</sub> W <sub>9</sub> E <sub>13</sub> R <sub>9</sub> G <sub>9</sub> D <sub>9</sub> E <sub>9</sub> V <sub>8</sub> M <sub>9</sub> S <sub>10</sub> T <sub>9</sub> R <sub>7</sub> S <sub>9</sub> A <sub>13</sub> L <sub>9</sub><br>F <sub>4</sub> A <sub>4</sub> R <sub>3</sub> K <sub>1</sub> D <sub>4</sub> G <sub>4</sub> F <sub>4</sub> F <sub>4</sub> I <sub>4</sub> P <sub>4</sub> K <sub>4</sub> L <sub>4</sub> K <sub>4</sub> K <sub>4</sub> E <sub>4</sub> S <sub>4</sub> M <sub>4</sub> V <sub>4</sub> A <sub>4</sub> M <sub>4</sub> L <sub>4</sub> E <sub>4</sub> W <sub>4</sub> E <sub>5</sub> S <sub>4</sub> G <sub>4</sub> D <sub>4</sub> G <sub>1</sub> I <sub>4</sub> M <sub>4</sub> S <sub>4</sub> T <sub>4</sub> S <sub>5</sub> S <sub>4</sub> A <sub>4</sub> L <sub>4</sub> S <sub>3</sub> A <sub>4</sub> N <sub>1</sub> Y <sub>4</sub><br>H <sub>1</sub> F <sub>1</sub> A <sub>1</sub> Q <sub>1</sub> R <sub>1</sub> D <sub>1</sub> G <sub>1</sub> G <sub>1</sub> Y <sub>1</sub> I <sub>1</sub> Y <sub>2</sub> L <sub>1</sub> K <sub>1</sub> E <sub>1</sub> S <sub>1</sub> I <sub>1</sub> I <sub>1</sub> M <sub>2</sub> V <sub>4</sub> L <sub>1</sub> M <sub>2</sub> W <sub>1</sub> S <sub>1</sub> V <sub>2</sub> E <sub>1</sub> V <sub>1</sub> M <sub>1</sub> I <sub>1</sub> T <sub>1</sub> S <sub>1</sub> N <sub>3</sub> L <sub>1</sub> A <sub>1</sub><br>Q <sub>1</sub> F <sub>1</sub> P <sub>1</sub> D <sub>1</sub> V <sub>1</sub> A <sub>1</sub> S <sub>2</sub> D <sub>1</sub> | N <sub>9</sub> A <sub>9</sub> A <sub>9</sub> Y <sub>9</sub> I <sub>9</sub> E <sub>9</sub> S <sub>9</sub> F <sub>9</sub> G <sub>9</sub> Y <sub>9</sub> D <sub>9</sub> D <sub>9</sub> L <sub>9</sub> M <sub>9</sub> M <sub>8</sub> E <sub>10</sub> I <sub>9</sub> E <sub>9</sub> R <sub>7</sub> F <sub>7</sub> A <sub>13</sub> V <sub>9</sub> F <sub>9</sub> W <sub>9</sub> A <sub>9</sub> S <sub>9</sub> E <sub>11</sub> K <sub>9</sub> G <sub>9</sub> C <sub>9</sub> E <sub>9</sub> Y <sub>9</sub> P <sub>9</sub> L <sub>9</sub> L <sub>9</sub> D <sub>9</sub> S <sub>9</sub> K <sub>9</sub> R <sub>9</sub> V <sub>9</sub><br>I <sub>4</sub> E <sub>4</sub> S <sub>4</sub> F <sub>4</sub> G <sub>4</sub> Y <sub>4</sub> D <sub>4</sub> D <sub>4</sub> L <sub>4</sub> M <sub>4</sub> T <sub>3</sub> E <sub>4</sub> I <sub>4</sub> E <sub>5</sub> S <sub>4</sub> F <sub>2</sub> A <sub>4</sub> V <sub>4</sub> F <sub>4</sub> W <sub>4</sub> F <sub>1</sub> S <sub>4</sub> E <sub>4</sub> K <sub>3</sub> G <sub>4</sub> C <sub>4</sub> G <sub>2</sub> Y <sub>4</sub> P <sub>4</sub> L <sub>4</sub> L <sub>4</sub> D <sub>4</sub> S <sub>4</sub> K <sub>4</sub> R <sub>4</sub> V <sub>4</sub> E <sub>4</sub> G <sub>4</sub> L <sub>4</sub> Y <sub>4</sub><br>A <sub>1</sub> Y <sub>1</sub> I <sub>1</sub> E <sub>1</sub> S <sub>1</sub> F <sub>1</sub> G <sub>1</sub> Y <sub>1</sub> D <sub>1</sub> D <sub>1</sub> A <sub>1</sub> M <sub>1</sub> T <sub>1</sub> I <sub>1</sub> Y <sub>2</sub> S <sub>1</sub> Y <sub>1</sub> S <sub>2</sub> Y <sub>2</sub> W <sub>1</sub> A <sub>1</sub> S <sub>2</sub> E <sub>1</sub> K <sub>1</sub> S <sub>1</sub> C <sub>1</sub> E <sub>1</sub> Y <sub>1</sub> P <sub>1</sub> L <sub>1</sub> L <sub>1</sub> D <sub>1</sub> M <sub>1</sub> K <sub>1</sub> R <sub>1</sub> V <sub>1</sub> E <sub>1</sub> G <sub>1</sub><br>L <sub>1</sub> V <sub>1</sub> A <sub>1</sub> V <sub>1</sub> S <sub>1</sub> |



| 2285                                                                                                                                                                                                                                                                                                                                                                                                                                                                                                                                                                                                                                                                                                                                                                                                                                                                                                                                                                                                                                                                                                                                                                                                                                                                                                                                                                                                                                                                                                                                                                                                                                                                                                                                                                                                                                                                                                                                                                                                                                                                                                                                                                                                                                     | 2290 | 2295 | 2300 | 2305 | 2310 | 2315 | 2320 |
|------------------------------------------------------------------------------------------------------------------------------------------------------------------------------------------------------------------------------------------------------------------------------------------------------------------------------------------------------------------------------------------------------------------------------------------------------------------------------------------------------------------------------------------------------------------------------------------------------------------------------------------------------------------------------------------------------------------------------------------------------------------------------------------------------------------------------------------------------------------------------------------------------------------------------------------------------------------------------------------------------------------------------------------------------------------------------------------------------------------------------------------------------------------------------------------------------------------------------------------------------------------------------------------------------------------------------------------------------------------------------------------------------------------------------------------------------------------------------------------------------------------------------------------------------------------------------------------------------------------------------------------------------------------------------------------------------------------------------------------------------------------------------------------------------------------------------------------------------------------------------------------------------------------------------------------------------------------------------------------------------------------------------------------------------------------------------------------------------------------------------------------------------------------------------------------------------------------------------------------|------|------|------|------|------|------|------|
| E <sub>9</sub> G <sub>9</sub> L <sub>9</sub> Y <sub>11</sub> L <sub>9</sub> D <sub>13</sub> E <sub>9</sub> F <sub>9</sub> T <sub>9</sub> E <sub>11</sub> I <sub>9</sub> N <sub>9</sub> E <sub>9</sub> E <sub>9</sub> W <sub>9</sub> L <sub>11</sub> S <sub>9</sub> G <sub>9</sub> I <sub>9</sub> L <sub>9</sub> P <sub>9</sub> P <sub>9</sub> S <sub>9</sub> F <sub>9</sub> E <sub>9</sub> D <sub>7</sub> C <sub>9</sub> Y <sub>9</sub> I <sub>9</sub> D <sub>9</sub> L <sub>9</sub> Q <sub>9</sub> V <sub>9</sub> V <sub>9</sub> D <sub>9</sub> S <sub>12</sub> P <sub>9</sub> Q <sub>9</sub> S <sub>7</sub> L <sub>7</sub><br>L <sub>5</sub> D <sub>4</sub> E <sub>4</sub> H <sub>4</sub> T <sub>4</sub> Y <sub>1</sub> I <sub>4</sub> N <sub>4</sub> E <sub>4</sub> D <sub>4</sub> W <sub>4</sub> L <sub>4</sub> S <sub>4</sub> G <sub>4</sub> I <sub>4</sub> G <sub>4</sub> P <sub>4</sub> P <sub>4</sub> S <sub>4</sub> F <sub>4</sub> E <sub>4</sub> N <sub>4</sub> C <sub>4</sub> Y <sub>4</sub> I <sub>3</sub> N <sub>6</sub> L <sub>4</sub> Q <sub>4</sub> V <sub>4</sub> V <sub>4</sub> D <sub>4</sub> S <sub>3</sub> P <sub>4</sub> Q <sub>3</sub> S <sub>4</sub> N <sub>4</sub> S <sub>3</sub> V <sub>3</sub> A <sub>3</sub> K <sub>4</sub><br>Y <sub>1</sub> F <sub>1</sub> D <sub>1</sub> E <sub>1</sub> T <sub>1</sub> Y <sub>2</sub> I <sub>1</sub> N <sub>1</sub> V <sub>2</sub> E <sub>1</sub> W <sub>1</sub> L <sub>1</sub> S <sub>1</sub> I <sub>1</sub> L <sub>1</sub> P <sub>1</sub> P <sub>1</sub> S <sub>1</sub> F <sub>1</sub> E <sub>1</sub> N <sub>1</sub> C <sub>1</sub> Y <sub>1</sub> I <sub>1</sub> D <sub>1</sub> L <sub>1</sub> M <sub>1</sub> V <sub>1</sub> K <sub>1</sub> D <sub>1</sub> S <sub>1</sub> P <sub>1</sub> Q <sub>1</sub> K <sub>1</sub> S <sub>1</sub> T <sub>2</sub> S <sub>2</sub><br>D <sub>1</sub> E <sub>1</sub> M <sub>1</sub> Q <sub>1</sub> V <sub>1</sub> R <sub>1</sub> N <sub>1</sub> M <sub>1</sub> L <sub>1</sub> V <sub>1</sub><br>V <sub>1</sub> N <sub>1</sub>                                                                                                                                                                                                          |      |      |      |      |      |      |      |
| 2325                                                                                                                                                                                                                                                                                                                                                                                                                                                                                                                                                                                                                                                                                                                                                                                                                                                                                                                                                                                                                                                                                                                                                                                                                                                                                                                                                                                                                                                                                                                                                                                                                                                                                                                                                                                                                                                                                                                                                                                                                                                                                                                                                                                                                                     | 2330 | 2335 | 2340 | 2345 | 2350 | 2355 | 2360 |
| N <sub>9</sub> V <sub>4</sub> A <sub>7</sub> K <sub>9</sub> S <sub>9</sub> E <sub>9</sub> E <sub>7</sub> E <sub>9</sub> V <sub>9</sub> T <sub>9</sub> S <sub>9</sub> K <sub>9</sub> F <sub>9</sub> R <sub>9</sub> M <sub>9</sub> G <sub>9</sub> I <sub>13</sub> E <sub>9</sub> A <sub>9</sub> P <sub>9</sub> M <sub>9</sub> T <sub>9</sub> F <sub>9</sub> V <sub>9</sub> T <sub>9</sub> G <sub>9</sub> N <sub>9</sub> A <sub>9</sub> Q <sub>8</sub> K <sub>10</sub> L <sub>9</sub> K <sub>9</sub> E <sub>9</sub> V <sub>9</sub> K <sub>9</sub> Q <sub>9</sub> I <sub>9</sub> F <sub>9</sub> G <sub>9</sub> P <sub>9</sub><br>S <sub>4</sub> E <sub>4</sub> E <sub>4</sub> E <sub>5</sub> V <sub>4</sub> T <sub>4</sub> S <sub>4</sub> K <sub>4</sub> I <sub>4</sub> R <sub>4</sub> M <sub>4</sub> G <sub>4</sub> I <sub>4</sub> E <sub>4</sub> A <sub>4</sub> P <sub>4</sub> A <sub>1</sub> T <sub>4</sub> F <sub>4</sub> V <sub>4</sub> T <sub>4</sub> G <sub>4</sub> N <sub>4</sub> A <sub>4</sub> Q <sub>4</sub> K <sub>4</sub> L <sub>4</sub> K <sub>4</sub> E <sub>4</sub> V <sub>4</sub> K <sub>4</sub> Q <sub>4</sub> I <sub>2</sub> F <sub>4</sub> G <sub>4</sub> P <sub>4</sub> T <sub>4</sub> I <sub>4</sub> P <sub>4</sub> I <sub>5</sub><br>A <sub>1</sub> K <sub>1</sub> V <sub>2</sub> S <sub>1</sub> E <sub>1</sub> G <sub>1</sub> K <sub>2</sub> T <sub>1</sub> S <sub>1</sub> K <sub>1</sub> I <sub>1</sub> E <sub>1</sub> V <sub>1</sub> G <sub>1</sub> I <sub>1</sub> E <sub>1</sub> P <sub>1</sub> I <sub>1</sub> T <sub>1</sub> I <sub>2</sub> V <sub>1</sub> T <sub>1</sub> G <sub>1</sub> N <sub>1</sub> A <sub>1</sub> Q <sub>1</sub> H <sub>1</sub> E <sub>1</sub> V <sub>1</sub> M <sub>2</sub> Q <sub>1</sub> I <sub>1</sub> F <sub>1</sub> G <sub>1</sub> P <sub>1</sub> T <sub>1</sub><br>A <sub>1</sub> S <sub>1</sub> V <sub>1</sub> S <sub>1</sub> V <sub>1</sub> R <sub>1</sub> M <sub>1</sub> A <sub>1</sub> T <sub>1</sub> F <sub>1</sub> L <sub>1</sub> K <sub>1</sub>                                                                                                                                                                                                                               |      |      |      |      |      |      |      |
| 2365                                                                                                                                                                                                                                                                                                                                                                                                                                                                                                                                                                                                                                                                                                                                                                                                                                                                                                                                                                                                                                                                                                                                                                                                                                                                                                                                                                                                                                                                                                                                                                                                                                                                                                                                                                                                                                                                                                                                                                                                                                                                                                                                                                                                                                     | 2370 | 2375 | 2380 | 2385 | 2390 | 2395 | 2400 |
| T <sub>9</sub> I <sub>10</sub> P <sub>9</sub> I <sub>9</sub> V <sub>10</sub> S <sub>9</sub> R <sub>8</sub> K <sub>9</sub> V <sub>5</sub> D <sub>9</sub> L <sub>9</sub> P <sub>10</sub> E <sub>9</sub> S <sub>9</sub> Q <sub>9</sub> G <sub>9</sub> T <sub>9</sub> I <sub>9</sub> E <sub>9</sub> E <sub>13</sub> L <sub>9</sub> I <sub>9</sub> K <sub>10</sub> E <sub>9</sub> K <sub>9</sub> A <sub>11</sub> R <sub>9</sub> V <sub>9</sub> A <sub>9</sub> A <sub>9</sub> E <sub>8</sub> L <sub>7</sub> V <sub>13</sub> G <sub>9</sub> G <sub>9</sub> P <sub>9</sub> V <sub>10</sub> L <sub>9</sub> V <sub>9</sub> E <sub>9</sub><br>V <sub>3</sub> S <sub>4</sub> R <sub>4</sub> K <sub>4</sub> I <sub>3</sub> D <sub>4</sub> L <sub>4</sub> P <sub>4</sub> E <sub>4</sub> P <sub>5</sub> Q <sub>4</sub> G <sub>4</sub> T <sub>4</sub> V <sub>3</sub> E <sub>4</sub> E <sub>3</sub> I <sub>4</sub> V <sub>6</sub> K <sub>4</sub> I <sub>1</sub> K <sub>5</sub> A <sub>3</sub> R <sub>4</sub> V <sub>4</sub> A <sub>4</sub> S <sub>2</sub> E <sub>4</sub> L <sub>3</sub> V <sub>3</sub> G <sub>4</sub> G <sub>4</sub> P <sub>4</sub> G <sub>1</sub> L <sub>4</sub> V <sub>5</sub> E <sub>4</sub> D <sub>4</sub> T <sub>4</sub> S <sub>4</sub> L <sub>4</sub><br>I <sub>1</sub> Q <sub>1</sub> S <sub>1</sub> R <sub>1</sub> K <sub>1</sub> V <sub>1</sub> D <sub>1</sub> I <sub>1</sub> E <sub>1</sub> Q <sub>1</sub> P <sub>2</sub> T <sub>1</sub> D <sub>1</sub> E <sub>1</sub> E <sub>1</sub> I <sub>1</sub> E <sub>1</sub> A <sub>1</sub> R <sub>1</sub> V <sub>1</sub> A <sub>1</sub> F <sub>1</sub> I <sub>1</sub> L <sub>1</sub> K <sub>1</sub> I <sub>2</sub> P <sub>1</sub> L <sub>1</sub> E <sub>1</sub> D <sub>1</sub> T <sub>1</sub><br>P <sub>1</sub> V <sub>1</sub> Q <sub>1</sub> F <sub>1</sub> G <sub>1</sub> A <sub>1</sub> V <sub>1</sub> A <sub>1</sub> E <sub>1</sub> V <sub>1</sub> G <sub>1</sub>                                                                                                                                                                                                                                                                                                                   |      |      |      |      |      |      |      |
| 2405                                                                                                                                                                                                                                                                                                                                                                                                                                                                                                                                                                                                                                                                                                                                                                                                                                                                                                                                                                                                                                                                                                                                                                                                                                                                                                                                                                                                                                                                                                                                                                                                                                                                                                                                                                                                                                                                                                                                                                                                                                                                                                                                                                                                                                     | 2410 | 2415 | 2420 | 2425 | 2430 | 2435 | 2440 |
| D <sub>9</sub> T <sub>9</sub> S <sub>9</sub> L <sub>9</sub> C <sub>9</sub> F <sub>9</sub> D <sub>9</sub> A <sub>9</sub> L <sub>9</sub> N <sub>9</sub> G <sub>9</sub> L <sub>9</sub> P <sub>10</sub> G <sub>9</sub> P <sub>9</sub> Y <sub>8</sub> I <sub>8</sub> K <sub>9</sub> W <sub>9</sub> F <sub>9</sub> L <sub>7</sub> E <sub>9</sub> G <sub>10</sub> I <sub>9</sub> G <sub>9</sub> L <sub>9</sub> E <sub>9</sub> G <sub>9</sub> L <sub>8</sub> Y <sub>9</sub> K <sub>9</sub> L <sub>9</sub> V <sub>9</sub> E <sub>9</sub> P <sub>9</sub> Y <sub>9</sub> Q <sub>9</sub> N <sub>9</sub> S <sub>7</sub> M <sub>9</sub><br>C <sub>4</sub> F <sub>4</sub> D <sub>4</sub> A <sub>4</sub> L <sub>4</sub> N <sub>4</sub> G <sub>4</sub> L <sub>4</sub> P <sub>4</sub> G <sub>4</sub> P <sub>5</sub> Y <sub>4</sub> I <sub>4</sub> K <sub>4</sub> W <sub>4</sub> F <sub>4</sub> M <sub>4</sub> E <sub>4</sub> G <sub>4</sub> I <sub>4</sub> G <sub>5</sub> L <sub>4</sub> E <sub>4</sub> G <sub>4</sub> L <sub>4</sub> Y <sub>4</sub> K <sub>4</sub> L <sub>4</sub> V <sub>4</sub> E <sub>4</sub> P <sub>4</sub> Y <sub>4</sub> Q <sub>4</sub> N <sub>4</sub> K <sub>4</sub> M <sub>4</sub> A <sub>4</sub> S <sub>4</sub> A <sub>5</sub> L <sub>4</sub><br>S <sub>1</sub> L <sub>1</sub> C <sub>1</sub> F <sub>1</sub> D <sub>1</sub> A <sub>1</sub> L <sub>1</sub> N <sub>1</sub> G <sub>1</sub> L <sub>1</sub> G <sub>1</sub> Y <sub>1</sub> I <sub>1</sub> K <sub>1</sub> W <sub>1</sub> F <sub>1</sub> L <sub>1</sub> E <sub>1</sub> M <sub>2</sub> I <sub>1</sub> L <sub>1</sub> E <sub>1</sub> G <sub>1</sub> L <sub>1</sub> Y <sub>1</sub> K <sub>1</sub> L <sub>1</sub> V <sub>1</sub> E <sub>1</sub> P <sub>1</sub> Y <sub>1</sub> Q <sub>1</sub> N <sub>1</sub> K <sub>1</sub> M <sub>1</sub> K <sub>2</sub> S <sub>1</sub><br>V <sub>1</sub>                                                                                                                                                                                                                                                                                                                                                                                     |      |      |      |      |      |      |      |
| 2445                                                                                                                                                                                                                                                                                                                                                                                                                                                                                                                                                                                                                                                                                                                                                                                                                                                                                                                                                                                                                                                                                                                                                                                                                                                                                                                                                                                                                                                                                                                                                                                                                                                                                                                                                                                                                                                                                                                                                                                                                                                                                                                                                                                                                                     | 2450 | 2455 | 2460 | 2465 | 2470 | 2475 | 2480 |
| A <sub>10</sub> S <sub>9</sub> A <sub>9</sub> L <sub>9</sub> C <sub>9</sub> V <sub>13</sub> F <sub>10</sub> A <sub>9</sub> F <sub>9</sub> V <sub>9</sub> N <sub>9</sub> K <sub>9</sub> V <sub>9</sub> G <sub>9</sub> D <sub>9</sub> P <sub>9</sub> M <sub>8</sub> I <sub>9</sub> F <sub>9</sub> K <sub>9</sub> G <sub>13</sub> V <sub>9</sub> L <sub>9</sub> S <sub>6</sub> G <sub>9</sub> E <sub>9</sub> I <sub>7</sub> V <sub>9</sub> M <sub>5</sub> P <sub>9</sub> R <sub>9</sub> G <sub>9</sub> P <sub>6</sub> N <sub>6</sub> S <sub>6</sub> F <sub>9</sub> G <sub>9</sub> W <sub>9</sub> D <sub>9</sub><br>C <sub>4</sub> V <sub>4</sub> F <sub>4</sub> A <sub>4</sub> F <sub>5</sub> A <sub>1</sub> N <sub>4</sub> K <sub>4</sub> V <sub>4</sub> G <sub>4</sub> D <sub>4</sub> D <sub>4</sub> P <sub>4</sub> M <sub>4</sub> I <sub>4</sub> F <sub>4</sub> K <sub>4</sub> G <sub>3</sub> V <sub>4</sub> L <sub>4</sub> S <sub>4</sub> L <sub>4</sub> E <sub>4</sub> I <sub>4</sub> V <sub>4</sub> M <sub>4</sub> P <sub>4</sub> R <sub>4</sub> G <sub>4</sub> P <sub>4</sub> K <sub>2</sub> S <sub>3</sub> F <sub>4</sub> G <sub>4</sub> W <sub>4</sub> D <sub>4</sub> P <sub>4</sub> I <sub>4</sub> F <sub>4</sub> Q <sub>4</sub><br>L <sub>1</sub> C <sub>1</sub> V <sub>1</sub> V <sub>1</sub> N <sub>1</sub> K <sub>1</sub> V <sub>1</sub> G <sub>1</sub> D <sub>1</sub> D <sub>1</sub> P <sub>1</sub> M <sub>1</sub> I <sub>1</sub> F <sub>1</sub> K <sub>1</sub> G <sub>1</sub> V <sub>1</sub> S <sub>1</sub> G <sub>1</sub> K <sub>1</sub> L <sub>1</sub> V <sub>1</sub> M <sub>3</sub> P <sub>1</sub> R <sub>1</sub> G <sub>1</sub> L <sub>1</sub> N <sub>1</sub> S <sub>4</sub> S <sub>1</sub> G <sub>1</sub> W <sub>1</sub> D <sub>1</sub> P <sub>1</sub> I <sub>1</sub><br>L <sub>1</sub> S <sub>1</sub> N <sub>1</sub>                                                                                                                                                                                                                                                                                                                                                                                                  |      |      |      |      |      |      |      |
| 2485                                                                                                                                                                                                                                                                                                                                                                                                                                                                                                                                                                                                                                                                                                                                                                                                                                                                                                                                                                                                                                                                                                                                                                                                                                                                                                                                                                                                                                                                                                                                                                                                                                                                                                                                                                                                                                                                                                                                                                                                                                                                                                                                                                                                                                     | 2490 | 2495 | 2500 | 2505 | 2510 | 2515 | 2520 |
| P <sub>12</sub> I <sub>9</sub> F <sub>9</sub> Q <sub>9</sub> P <sub>9</sub> L <sub>9</sub> N <sub>8</sub> W <sub>9</sub> K <sub>7</sub> S <sub>6</sub> T <sub>9</sub> F <sub>9</sub> A <sub>12</sub> E <sub>11</sub> M <sub>9</sub> M <sub>9</sub> T <sub>9</sub> E <sub>9</sub> E <sub>9</sub> K <sub>9</sub> N <sub>9</sub> M <sub>8</sub> M <sub>9</sub> S <sub>9</sub> H <sub>9</sub> R <sub>10</sub> F <sub>9</sub> R <sub>9</sub> A <sub>9</sub> L <sub>10</sub> S <sub>9</sub> L <sub>9</sub> V <sub>9</sub> S <sub>9</sub> D <sub>12</sub> F <sub>9</sub> L <sub>9</sub> K <sub>9</sub> S <sub>8</sub> S <sub>11</sub><br>F <sub>1</sub> L <sub>4</sub> N <sub>4</sub> W <sub>4</sub> S <sub>3</sub> S <sub>3</sub> D <sub>4</sub> F <sub>4</sub> A <sub>4</sub> E <sub>4</sub> M <sub>4</sub> M <sub>4</sub> M <sub>4</sub> M <sub>4</sub> E <sub>4</sub> K <sub>4</sub> N <sub>4</sub> M <sub>4</sub> M <sub>4</sub> S <sub>4</sub> H <sub>4</sub> R <sub>4</sub> F <sub>4</sub> R <sub>4</sub> A <sub>4</sub> L <sub>4</sub> S <sub>4</sub> L <sub>5</sub> V <sub>4</sub> S <sub>4</sub> D <sub>4</sub> F <sub>4</sub> L <sub>4</sub> K <sub>4</sub> L <sub>1</sub> S <sub>4</sub> S <sub>4</sub> Y <sub>4</sub> F <sub>4</sub> H <sub>4</sub><br>S <sub>1</sub> Q <sub>1</sub> P <sub>1</sub> L <sub>1</sub> G <sub>1</sub> K <sub>1</sub> T <sub>4</sub> S <sub>1</sub> S <sub>2</sub> K <sub>3</sub> A <sub>1</sub> E <sub>1</sub> T <sub>1</sub> A <sub>1</sub> E <sub>1</sub> A <sub>2</sub> K <sub>1</sub> N <sub>1</sub> M <sub>1</sub> M <sub>1</sub> T <sub>1</sub> H <sub>1</sub> F <sub>1</sub> A <sub>1</sub> S <sub>1</sub> V <sub>1</sub> S <sub>1</sub> D <sub>1</sub> F <sub>1</sub> S <sub>1</sub> N <sub>1</sub> S <sub>1</sub> D <sub>2</sub> T <sub>1</sub><br>M <sub>1</sub> N <sub>1</sub> W <sub>1</sub> K <sub>1</sub> T <sub>1</sub> F <sub>1</sub> E <sub>1</sub> S <sub>1</sub> Y <sub>1</sub>                                                                                                                                                                                                                                                                                                     |      |      |      |      |      |      |      |
| 2525                                                                                                                                                                                                                                                                                                                                                                                                                                                                                                                                                                                                                                                                                                                                                                                                                                                                                                                                                                                                                                                                                                                                                                                                                                                                                                                                                                                                                                                                                                                                                                                                                                                                                                                                                                                                                                                                                                                                                                                                                                                                                                                                                                                                                                     | 2530 | 2535 | 2540 | 2545 | 2550 | 2555 | 2560 |
| S <sub>9</sub> Y <sub>9</sub> F <sub>10</sub> S <sub>9</sub> F <sub>9</sub> A <sub>9</sub> K <sub>9</sub> G <sub>9</sub> L <sub>10</sub> D <sub>10</sub> R <sub>9</sub> D <sub>11</sub> I <sub>9</sub> F <sub>9</sub> I <sub>9</sub> D <sub>9</sub> V <sub>9</sub> Q <sub>9</sub> A <sub>9</sub> I <sub>9</sub> D <sub>9</sub> K <sub>9</sub> D <sub>9</sub> E <sub>14</sub> I <sub>9</sub> E <sub>10</sub> A <sub>9</sub> E <sub>9</sub> M <sub>9</sub> T <sub>9</sub> K <sub>9</sub> L <sub>9</sub> K <sub>10</sub> E <sub>9</sub> L <sub>9</sub> W <sub>9</sub> S <sub>7</sub> S <sub>7</sub> N <sub>9</sub> K <sub>9</sub><br>F <sub>5</sub> A <sub>4</sub> K <sub>4</sub> G <sub>4</sub> V <sub>3</sub> D <sub>4</sub> R <sub>4</sub> D <sub>5</sub> V <sub>2</sub> F <sub>4</sub> I <sub>4</sub> F <sub>1</sub> V <sub>4</sub> Q <sub>4</sub> A <sub>4</sub> I <sub>2</sub> D <sub>4</sub> K <sub>4</sub> D <sub>5</sub> E <sub>4</sub> I <sub>4</sub> E <sub>5</sub> A <sub>4</sub> M <sub>4</sub> T <sub>4</sub> K <sub>4</sub> L <sub>4</sub> K <sub>5</sub> E <sub>4</sub> L <sub>4</sub> W <sub>4</sub> S <sub>3</sub> N <sub>4</sub> N <sub>4</sub> K <sub>4</sub> P <sub>4</sub> T <sub>4</sub> K <sub>2</sub> T <sub>5</sub><br>S <sub>1</sub> A <sub>1</sub> K <sub>1</sub> G <sub>1</sub> E <sub>1</sub> I <sub>1</sub> F <sub>1</sub> N <sub>1</sub> L <sub>1</sub> D <sub>1</sub> V <sub>1</sub> V <sub>2</sub> A <sub>1</sub> I <sub>1</sub> G <sub>2</sub> K <sub>1</sub> I <sub>1</sub> A <sub>1</sub> M <sub>1</sub> T <sub>1</sub> A <sub>2</sub> E <sub>1</sub> E <sub>1</sub> M <sub>1</sub> W <sub>1</sub> S <sub>1</sub> N <sub>1</sub> K <sub>2</sub> N <sub>2</sub> S <sub>2</sub><br>L <sub>1</sub> V <sub>1</sub> R <sub>1</sub> Q <sub>1</sub> L <sub>1</sub> Q <sub>1</sub> N <sub>1</sub> K <sub>1</sub> P <sub>1</sub>                                                                                                                                                                                                                                                                                                                                                                                |      |      |      |      |      |      |      |
| 2565                                                                                                                                                                                                                                                                                                                                                                                                                                                                                                                                                                                                                                                                                                                                                                                                                                                                                                                                                                                                                                                                                                                                                                                                                                                                                                                                                                                                                                                                                                                                                                                                                                                                                                                                                                                                                                                                                                                                                                                                                                                                                                                                                                                                                                     | 2570 | 2575 | 2580 | 2585 | 2590 | 2595 | 2600 |
| P <sub>9</sub> T <sub>10</sub> K <sub>8</sub> T <sub>9</sub> R <sub>9</sub> S <sub>13</sub> P <sub>9</sub> F <sub>9</sub> E <sub>9</sub> S <sub>10</sub> S <sub>9</sub> L <sub>9</sub> R <sub>8</sub> A <sub>13</sub> P <sub>9</sub> Q <sub>9</sub> V <sub>9</sub> A <sub>9</sub> R <sub>9</sub> V <sub>9</sub> N <sub>9</sub> E <sub>9</sub> L <sub>13</sub> L <sub>9</sub> K <sub>9</sub> Q <sub>9</sub> L <sub>9</sub> K <sub>9</sub> D <sub>9</sub> A <sub>9</sub> G <sub>9</sub> M <sub>8</sub> Q <sub>9</sub> T <sub>9</sub> S <sub>10</sub> K <sub>9</sub> S <sub>9</sub> P <sub>13</sub> C <sub>9</sub><br>R <sub>4</sub> S <sub>4</sub> P <sub>4</sub> F <sub>4</sub> E <sub>4</sub> F <sub>1</sub> S <sub>4</sub> S <sub>5</sub> L <sub>4</sub> R <sub>4</sub> A <sub>4</sub> P <sub>4</sub> Q <sub>4</sub> V <sub>4</sub> Q <sub>1</sub> R <sub>4</sub> V <sub>4</sub> N <sub>4</sub> E <sub>4</sub> L <sub>4</sub> L <sub>4</sub> K <sub>2</sub> Q <sub>4</sub> K <sub>1</sub> K <sub>4</sub> D <sub>4</sub> A <sub>4</sub> G <sub>4</sub> M <sub>2</sub> Q <sub>4</sub> T <sub>4</sub> S <sub>4</sub> K <sub>4</sub> S <sub>5</sub> P <sub>4</sub> C <sub>4</sub> G <sub>4</sub> E <sub>4</sub> G <sub>1</sub> D <sub>4</sub><br>S <sub>1</sub> S <sub>1</sub> S <sub>1</sub> P <sub>1</sub> E <sub>1</sub> K <sub>1</sub> L <sub>1</sub> R <sub>1</sub> A <sub>1</sub> P <sub>1</sub> V <sub>1</sub> A <sub>1</sub> R <sub>1</sub> V <sub>1</sub> N <sub>1</sub> E <sub>1</sub> Q <sub>2</sub> L <sub>1</sub> Q <sub>1</sub> L <sub>1</sub> K <sub>1</sub> D <sub>1</sub> I <sub>1</sub> G <sub>1</sub> M <sub>1</sub> Q <sub>1</sub> T <sub>1</sub> K <sub>1</sub> P <sub>1</sub> C <sub>1</sub> E <sub>1</sub><br>R <sub>1</sub> L <sub>1</sub> V <sub>1</sub> A <sub>1</sub>                                                                                                                                                                                                                                                                                                                                                                                                                                            |      |      |      |      |      |      |      |
| 2605                                                                                                                                                                                                                                                                                                                                                                                                                                                                                                                                                                                                                                                                                                                                                                                                                                                                                                                                                                                                                                                                                                                                                                                                                                                                                                                                                                                                                                                                                                                                                                                                                                                                                                                                                                                                                                                                                                                                                                                                                                                                                                                                                                                                                                     | 2610 | 2615 | 2620 | 2625 | 2630 | 2635 | 2640 |
| G <sub>9</sub> E <sub>8</sub> P <sub>9</sub> D <sub>9</sub> E <sub>10</sub> G <sub>9</sub> E <sub>9</sub> V <sub>8</sub> A <sub>8</sub> S <sub>13</sub> P <sub>9</sub> E <sub>9</sub> S <sub>8</sub> S <sub>5</sub> E <sub>10</sub> D <sub>8</sub> E <sub>9</sub> E <sub>9</sub> Q <sub>9</sub> R <sub>6</sub> K <sub>5</sub> D <sub>7</sub> K <sub>10</sub> G <sub>9</sub> K <sub>8</sub> A <sub>8</sub> P <sub>7</sub> M <sub>5</sub> E <sub>13</sub> P <sub>7</sub> P <sub>8</sub> A <sub>8</sub> E <sub>8</sub> R <sub>8</sub> S <sub>7</sub> Q <sub>8</sub> S <sub>9</sub> E <sub>8</sub> K <sub>8</sub> S <sub>9</sub><br>E <sub>4</sub> G <sub>4</sub> E <sub>5</sub> V <sub>4</sub> A <sub>3</sub> S <sub>4</sub> P <sub>4</sub> E <sub>4</sub> S <sub>4</sub> E <sub>1</sub> E <sub>4</sub> D <sub>4</sub> E <sub>5</sub> E <sub>4</sub> Q <sub>4</sub> Q <sub>2</sub> T <sub>2</sub> D <sub>3</sub> K <sub>4</sub> G <sub>4</sub> T <sub>5</sub> A <sub>3</sub> P <sub>4</sub> M <sub>4</sub> E <sub>4</sub> P <sub>2</sub> S <sub>2</sub> V <sub>4</sub> P <sub>1</sub> K <sub>1</sub> S <sub>3</sub> Q <sub>4</sub> S <sub>2</sub> E <sub>3</sub> K <sub>3</sub> S <sub>4</sub> V <sub>2</sub> G <sub>3</sub> E <sub>3</sub> G <sub>2</sub><br>P <sub>1</sub> D <sub>1</sub> G <sub>1</sub> V <sub>1</sub> V <sub>1</sub> A <sub>1</sub> S <sub>1</sub> P <sub>1</sub> S <sub>1</sub> S <sub>1</sub> D <sub>1</sub> G <sub>1</sub> Q <sub>1</sub> N <sub>1</sub> T <sub>1</sub> N <sub>1</sub> M <sub>3</sub> G <sub>1</sub> A <sub>1</sub> P <sub>1</sub> S <sub>2</sub> E <sub>1</sub> T <sub>3</sub> H <sub>1</sub> E <sub>1</sub> K <sub>1</sub> T <sub>1</sub> K <sub>1</sub> F <sub>1</sub> E <sub>1</sub> K <sub>1</sub> S <sub>2</sub> M <sub>1</sub> F <sub>1</sub><br>E <sub>1</sub> V <sub>1</sub> R <sub>1</sub> W <sub>1</sub> T <sub>1</sub> M <sub>1</sub> T <sub>1</sub> P <sub>1</sub> L <sub>1</sub> N <sub>1</sub> P <sub>1</sub> Q <sub>1</sub> G <sub>1</sub> M <sub>1</sub> A <sub>1</sub> D <sub>1</sub><br>R <sub>1</sub> Q <sub>1</sub> N <sub>1</sub> A <sub>1</sub> Q <sub>1</sub> Q <sub>1</sub> N <sub>1</sub> L <sub>1</sub> T <sub>1</sub> N <sub>1</sub><br>T <sub>1</sub><br>S <sub>1</sub> |      |      |      |      |      |      |      |

Supplemental Figure 2. UCBSV AA variability determined using datamonkey.org.

| 5                                                                                                                                                                                                                                                                                                                                                                                                                                                                                                                                                                                                                        | 10                                                                   | 15                                              | 20                                                                            | 25                                                             | 30                               | 35                                                                                           | 40                                                                               |
|--------------------------------------------------------------------------------------------------------------------------------------------------------------------------------------------------------------------------------------------------------------------------------------------------------------------------------------------------------------------------------------------------------------------------------------------------------------------------------------------------------------------------------------------------------------------------------------------------------------------------|----------------------------------------------------------------------|-------------------------------------------------|-------------------------------------------------------------------------------|----------------------------------------------------------------|----------------------------------|----------------------------------------------------------------------------------------------|----------------------------------------------------------------------------------|
| M <sub>1</sub> S <sub>1</sub> T <sub>1</sub> I <sub>1</sub> Q <sub>1</sub> L <sub>1</sub> F <sub>1</sub> K <sub>1</sub> T <sub>1</sub> I <sub>1</sub> S <sub>1</sub> F <sub>1</sub> G <sub>1</sub> S <sub>1</sub> F <sub>1</sub> E <sub>1</sub> P <sub>1</sub> V <sub>1</sub> K <sub>1</sub> L <sub>1</sub> D <sub>1</sub> E <sub>1</sub> G <sub>1</sub> N <sub>1</sub> N <sub>1</sub> V <sub>1</sub> M <sub>1</sub> E <sub>1</sub> K <sub>1</sub> I <sub>1</sub> P <sub>1</sub> V <sub>1</sub> D <sub>1</sub> L <sub>1</sub> L <sub>1</sub> A <sub>1</sub> G <sub>1</sub> N <sub>1</sub> D <sub>1</sub> G <sub>1</sub>  |                                                                      |                                                 |                                                                               |                                                                |                                  |                                                                                              |                                                                                  |
|                                                                                                                                                                                                                                                                                                                                                                                                                                                                                                                                                                                                                          | T <sub>5</sub><br>K <sub>1</sub>                                     |                                                 | I <sub>1</sub>                                                                | G <sub>1</sub> E <sub>2</sub> G <sub>1</sub>                   | I <sub>5</sub> V <sub>5</sub>    | V <sub>7</sub><br>T <sub>3</sub><br>L <sub>2</sub><br>A <sub>2</sub>                         | Q <sub>1</sub> T <sub>4</sub><br>D <sub>1</sub> S <sub>3</sub><br>M <sub>1</sub> |
| 45                                                                                                                                                                                                                                                                                                                                                                                                                                                                                                                                                                                                                       | 50                                                                   | 55                                              | 60                                                                            | 65                                                             | 70                               | 75                                                                                           | 80                                                                               |
| S <sub>11</sub> G <sub>1</sub> P <sub>1</sub> E <sub>1</sub> E <sub>1</sub> Q <sub>1</sub> S <sub>1</sub> E <sub>1</sub> Q <sub>1</sub> K <sub>1</sub> Y <sub>1</sub> H <sub>1</sub> S <sub>1</sub> K <sub>1</sub> E <sub>1</sub> S <sub>1</sub> G <sub>1</sub> E <sub>1</sub> S <sub>1</sub> W <sub>1</sub> R <sub>1</sub> K <sub>1</sub> V <sub>1</sub> T <sub>1</sub> D <sub>1</sub> L <sub>1</sub> Y <sub>1</sub> S <sub>1</sub> V <sub>1</sub> I <sub>1</sub> G <sub>1</sub> N <sub>1</sub> S <sub>1</sub> V <sub>1</sub> Y <sub>1</sub> C <sub>1</sub> R <sub>1</sub> S <sub>1</sub> Y <sub>1</sub> V <sub>1</sub> |                                                                      |                                                 |                                                                               |                                                                |                                  |                                                                                              |                                                                                  |
| F <sub>3</sub>                                                                                                                                                                                                                                                                                                                                                                                                                                                                                                                                                                                                           | G <sub>1</sub><br>T <sub>1</sub> K <sub>1</sub>                      | H <sub>3</sub><br>G <sub>1</sub> G <sub>1</sub> | K <sub>1</sub>                                                                |                                                                |                                  | M <sub>1</sub>                                                                               |                                                                                  |
|                                                                                                                                                                                                                                                                                                                                                                                                                                                                                                                                                                                                                          |                                                                      | Q <sub>2</sub>                                  |                                                                               |                                                                |                                  |                                                                                              |                                                                                  |
| 85                                                                                                                                                                                                                                                                                                                                                                                                                                                                                                                                                                                                                       | 90                                                                   | 95                                              | 100                                                                           | 105                                                            | 110                              | 115                                                                                          | 120                                                                              |
| A <sub>1</sub> M <sub>1</sub> K <sub>1</sub> N <sub>1</sub> F <sub>1</sub> L <sub>1</sub> N <sub>1</sub> D <sub>1</sub> T <sub>1</sub> K <sub>1</sub> W <sub>1</sub> G <sub>1</sub> G <sub>1</sub> L <sub>1</sub> F <sub>1</sub> K <sub>1</sub> N <sub>1</sub> K <sub>1</sub> K <sub>1</sub> G <sub>1</sub> Q <sub>1</sub> E <sub>1</sub> L <sub>1</sub> K <sub>1</sub> A <sub>1</sub> A <sub>1</sub> A <sub>1</sub> S <sub>1</sub> L <sub>1</sub> S <sub>1</sub> S <sub>1</sub> A <sub>1</sub> T <sub>1</sub> S <sub>1</sub> Y <sub>1</sub> G <sub>1</sub> F <sub>1</sub> M <sub>1</sub> Y <sub>1</sub> D <sub>1</sub>  |                                                                      |                                                 |                                                                               |                                                                |                                  |                                                                                              |                                                                                  |
|                                                                                                                                                                                                                                                                                                                                                                                                                                                                                                                                                                                                                          | A <sub>1</sub>                                                       |                                                 | S <sub>3</sub>                                                                |                                                                |                                  |                                                                                              |                                                                                  |
| 125                                                                                                                                                                                                                                                                                                                                                                                                                                                                                                                                                                                                                      | 130                                                                  | 135                                             | 140                                                                           | 145                                                            | 150                              | 155                                                                                          | 160                                                                              |
| P <sub>1</sub> V <sub>1</sub> A <sub>1</sub> C <sub>1</sub> A <sub>1</sub> F <sub>1</sub> E <sub>1</sub> C <sub>1</sub> P <sub>1</sub> V <sub>1</sub> C <sub>1</sub> S <sub>1</sub> T <sub>1</sub> K <sub>1</sub> A <sub>1</sub> T <sub>1</sub> A <sub>1</sub> L <sub>1</sub> E <sub>1</sub> A <sub>1</sub> F <sub>1</sub> T <sub>1</sub> S <sub>1</sub> D <sub>1</sub> C <sub>1</sub> D <sub>1</sub> H <sub>1</sub> C <sub>1</sub> F <sub>1</sub> E <sub>1</sub> L <sub>1</sub> K <sub>1</sub> H <sub>1</sub> L <sub>1</sub> D <sub>1</sub> D <sub>1</sub> D <sub>1</sub> S <sub>1</sub> I <sub>1</sub> V <sub>1</sub>  |                                                                      |                                                 |                                                                               |                                                                |                                  |                                                                                              |                                                                                  |
|                                                                                                                                                                                                                                                                                                                                                                                                                                                                                                                                                                                                                          |                                                                      | M <sub>1</sub>                                  | S <sub>5</sub><br>S <sub>1</sub>                                              |                                                                |                                  | V <sub>3</sub><br>E <sub>5</sub><br>N <sub>3</sub><br>G <sub>1</sub>                         | V <sub>3</sub><br>F <sub>1</sub>                                                 |
| 165                                                                                                                                                                                                                                                                                                                                                                                                                                                                                                                                                                                                                      | 170                                                                  | 175                                             | 180                                                                           | 185                                                            | 190                              | 195                                                                                          | 200                                                                              |
| Q <sub>1</sub> T <sub>1</sub> E <sub>1</sub> T <sub>1</sub> K <sub>1</sub> F <sub>1</sub> Y <sub>1</sub> P <sub>1</sub> M <sub>1</sub> N <sub>1</sub> P <sub>1</sub> I <sub>1</sub> E <sub>1</sub> L <sub>1</sub> D <sub>1</sub> V <sub>1</sub> E <sub>1</sub> D <sub>1</sub> N <sub>1</sub> L <sub>1</sub> V <sub>1</sub> E <sub>1</sub> A <sub>1</sub> A <sub>1</sub> S <sub>1</sub> L <sub>1</sub> E <sub>1</sub> W <sub>1</sub> L <sub>1</sub> K <sub>1</sub> G <sub>1</sub> D <sub>1</sub> V <sub>1</sub> E <sub>1</sub> E <sub>1</sub> S <sub>1</sub> V <sub>1</sub> V <sub>1</sub> D <sub>1</sub> S <sub>1</sub>  |                                                                      |                                                 |                                                                               |                                                                |                                  |                                                                                              |                                                                                  |
| D <sub>4</sub>                                                                                                                                                                                                                                                                                                                                                                                                                                                                                                                                                                                                           | V <sub>1</sub>                                                       | I <sub>3</sub> D <sub>7</sub>                   | G <sub>4</sub><br>M <sub>1</sub>                                              | I <sub>2</sub>                                                 |                                  | V <sub>3</sub> G <sub>1</sub> S <sub>4</sub> E <sub>2</sub><br>M <sub>1</sub> H <sub>1</sub> | K <sub>3</sub> I <sub>3</sub>                                                    |
| 205                                                                                                                                                                                                                                                                                                                                                                                                                                                                                                                                                                                                                      | 210                                                                  | 215                                             | 220                                                                           | 225                                                            | 230                              | 235                                                                                          | 240                                                                              |
| V <sub>12</sub> L <sub>1</sub> L <sub>1</sub> L <sub>1</sub> E <sub>1</sub> D <sub>1</sub> K <sub>1</sub> E <sub>1</sub> R <sub>1</sub> R <sub>1</sub> V <sub>1</sub> T <sub>1</sub> K <sub>1</sub> K <sub>1</sub> A <sub>1</sub> L <sub>1</sub> V <sub>1</sub> K <sub>1</sub> S <sub>1</sub> S <sub>1</sub> A <sub>1</sub> E <sub>1</sub> T <sub>1</sub> K <sub>1</sub> L <sub>1</sub> V <sub>1</sub> A <sub>1</sub> N <sub>1</sub> V <sub>1</sub> A <sub>1</sub> D <sub>1</sub> L <sub>1</sub> T <sub>1</sub> K <sub>1</sub> K <sub>1</sub> L <sub>1</sub> T <sub>1</sub> E <sub>1</sub> I <sub>1</sub> C <sub>1</sub> |                                                                      |                                                 |                                                                               |                                                                |                                  |                                                                                              |                                                                                  |
| M <sub>2</sub>                                                                                                                                                                                                                                                                                                                                                                                                                                                                                                                                                                                                           | E <sub>2</sub> S <sub>1</sub>                                        | I <sub>1</sub>                                  | I <sub>1</sub><br>M <sub>1</sub>                                              | K <sub>2</sub> G <sub>1</sub> S <sub>4</sub><br>G <sub>1</sub> | M <sub>2</sub> S <sub>3</sub>    | A <sub>2</sub> S <sub>5</sub> N <sub>2</sub><br>I <sub>1</sub>                               | S <sub>5</sub> S <sub>1</sub>                                                    |
| 245                                                                                                                                                                                                                                                                                                                                                                                                                                                                                                                                                                                                                      | 250                                                                  | 255                                             | 260                                                                           | 265                                                            | 270                              | 275                                                                                          | 280                                                                              |
| C <sub>1</sub> E <sub>1</sub> S <sub>1</sub> G <sub>1</sub> I <sub>1</sub> P <sub>1</sub> I <sub>1</sub> I <sub>1</sub> D <sub>1</sub> I <sub>1</sub> D <sub>1</sub> N <sub>1</sub> S <sub>1</sub> K <sub>1</sub> S <sub>1</sub> K <sub>1</sub> A <sub>1</sub> I <sub>1</sub> P <sub>1</sub> M <sub>1</sub> V <sub>1</sub> K <sub>1</sub> L <sub>1</sub> K <sub>1</sub> H <sub>1</sub> I <sub>1</sub> F <sub>1</sub> G <sub>1</sub> K <sub>1</sub> I <sub>1</sub> E <sub>1</sub> C <sub>1</sub> D <sub>1</sub> D <sub>1</sub> M <sub>1</sub> F <sub>1</sub> E <sub>1</sub> E <sub>1</sub> D <sub>1</sub> R <sub>1</sub>  |                                                                      |                                                 |                                                                               |                                                                |                                  |                                                                                              |                                                                                  |
|                                                                                                                                                                                                                                                                                                                                                                                                                                                                                                                                                                                                                          | M <sub>1</sub>                                                       | C <sub>4</sub>                                  | M <sub>1</sub>                                                                | I <sub>2</sub><br>A <sub>1</sub>                               | S <sub>1</sub> V <sub>3</sub>    |                                                                                              | G <sub>2</sub> D <sub>4</sub>                                                    |
| 285                                                                                                                                                                                                                                                                                                                                                                                                                                                                                                                                                                                                                      | 290                                                                  | 295                                             | 300                                                                           | 305                                                            | 310                              | 315                                                                                          | 320                                                                              |
| Y <sub>1</sub> F <sub>1</sub> L <sub>1</sub> E <sub>1</sub> H <sub>1</sub> S <sub>1</sub> N <sub>1</sub> A <sub>1</sub> G <sub>1</sub> K <sub>1</sub> I <sub>1</sub> F <sub>1</sub> R <sub>1</sub> S <sub>1</sub> C <sub>1</sub> E <sub>1</sub> K <sub>1</sub> I <sub>1</sub> T <sub>1</sub> Y <sub>1</sub> S <sub>1</sub> M <sub>1</sub> I <sub>1</sub> R <sub>1</sub> P <sub>1</sub> G <sub>1</sub> W <sub>1</sub> S <sub>1</sub> G <sub>1</sub> A <sub>1</sub> I <sub>1</sub> I <sub>1</sub> L <sub>1</sub> K <sub>1</sub> D <sub>1</sub> N <sub>1</sub> V <sub>1</sub> Q <sub>1</sub> G <sub>1</sub> E <sub>1</sub>  |                                                                      |                                                 |                                                                               |                                                                |                                  |                                                                                              |                                                                                  |
| H <sub>3</sub>                                                                                                                                                                                                                                                                                                                                                                                                                                                                                                                                                                                                           | E <sub>4</sub><br>N <sub>2</sub><br>R <sub>2</sub><br>K <sub>1</sub> | S <sub>4</sub><br>N <sub>2</sub>                | S <sub>3</sub> V <sub>2</sub><br>T <sub>2</sub>                               | F <sub>1</sub> K <sub>2</sub><br>R <sub>1</sub>                |                                  | S <sub>5</sub>                                                                               | S <sub>7</sub>                                                                   |
| 325                                                                                                                                                                                                                                                                                                                                                                                                                                                                                                                                                                                                                      | 330                                                                  | 335                                             | 340                                                                           | 345                                                            | 350                              | 355                                                                                          | 360                                                                              |
| D <sub>1</sub> H <sub>1</sub> D <sub>1</sub> K <sub>1</sub> F <sub>1</sub> D <sub>1</sub> F <sub>1</sub> I <sub>1</sub> N <sub>1</sub> D <sub>1</sub> I <sub>1</sub> C <sub>1</sub> V <sub>1</sub> V <sub>1</sub> Q <sub>1</sub> G <sub>1</sub> K <sub>1</sub> N <sub>1</sub> L <sub>1</sub> I <sub>1</sub> S <sub>1</sub> N <sub>1</sub> K <sub>1</sub> I <sub>1</sub> E <sub>1</sub> N <sub>1</sub> A <sub>1</sub> M <sub>1</sub> R <sub>1</sub> V <sub>1</sub> K <sub>1</sub> T <sub>1</sub> E <sub>1</sub> T <sub>1</sub> E <sub>1</sub> M <sub>1</sub> D <sub>1</sub> L <sub>1</sub> I <sub>1</sub> D <sub>1</sub>  |                                                                      |                                                 |                                                                               |                                                                |                                  |                                                                                              |                                                                                  |
| R <sub>1</sub> G <sub>1</sub>                                                                                                                                                                                                                                                                                                                                                                                                                                                                                                                                                                                            | D <sub>1</sub>                                                       |                                                 | S <sub>2</sub><br>M <sub>2</sub> D <sub>1</sub> Y <sub>3</sub> S <sub>2</sub> | N <sub>1</sub> G <sub>1</sub><br>K <sub>1</sub>                | I <sub>1</sub><br>T <sub>1</sub> | K <sub>1</sub> A <sub>1</sub><br>L <sub>1</sub>                                              | L <sub>1</sub><br>V <sub>1</sub>                                                 |
| 365                                                                                                                                                                                                                                                                                                                                                                                                                                                                                                                                                                                                                      | 370                                                                  | 375                                             | 380                                                                           | 385                                                            | 390                              | 395                                                                                          | 400                                                                              |
| L <sub>1</sub> Y <sub>1</sub> S <sub>1</sub> F <sub>1</sub> N <sub>1</sub> L <sub>1</sub> S <sub>1</sub> W <sub>1</sub> A <sub>1</sub> K <sub>1</sub> S <sub>1</sub> K <sub>1</sub> D <sub>1</sub> K <sub>1</sub> F <sub>1</sub> I <sub>1</sub> K <sub>1</sub> H <sub>1</sub> F <sub>1</sub> E <sub>1</sub> S <sub>1</sub> D <sub>1</sub> T <sub>1</sub> T <sub>1</sub> Q <sub>1</sub> L <sub>1</sub> I <sub>1</sub> S <sub>1</sub> S <sub>1</sub> C <sub>1</sub> C <sub>1</sub> T <sub>1</sub> P <sub>1</sub> S <sub>1</sub> T <sub>1</sub> L <sub>1</sub> W <sub>1</sub> L <sub>1</sub> Y <sub>1</sub> A <sub>1</sub>  |                                                                      |                                                 |                                                                               |                                                                |                                  |                                                                                              |                                                                                  |
| A <sub>2</sub>                                                                                                                                                                                                                                                                                                                                                                                                                                                                                                                                                                                                           | D <sub>2</sub><br>N <sub>1</sub>                                     | F <sub>1</sub>                                  | G <sub>2</sub><br>M <sub>2</sub><br>A <sub>1</sub>                            | V <sub>6</sub> K <sub>2</sub><br>M <sub>2</sub>                |                                  |                                                                                              |                                                                                  |
| 405                                                                                                                                                                                                                                                                                                                                                                                                                                                                                                                                                                                                                      | 410                                                                  | 415                                             | 420                                                                           | 425                                                            | 430                              | 435                                                                                          | 440                                                                              |
| S <sub>13</sub> K <sub>1</sub> A <sub>1</sub> S <sub>1</sub> F <sub>1</sub> Y <sub>1</sub> K <sub>1</sub> F <sub>1</sub> V <sub>1</sub> D <sub>1</sub> H <sub>1</sub> M <sub>1</sub> I <sub>1</sub> L <sub>1</sub> K <sub>1</sub> G <sub>1</sub> S <sub>1</sub> P <sub>1</sub> M <sub>1</sub> I <sub>1</sub> D <sub>1</sub> I <sub>1</sub> L <sub>1</sub> V <sub>1</sub> K <sub>1</sub> M <sub>1</sub> E <sub>1</sub> Y <sub>1</sub> V <sub>1</sub> G <sub>1</sub> K <sub>1</sub> H <sub>1</sub> L <sub>1</sub> D <sub>1</sub> M <sub>1</sub> F <sub>1</sub> N <sub>1</sub> S <sub>1</sub> V <sub>1</sub> E <sub>1</sub> |                                                                      |                                                 |                                                                               |                                                                |                                  |                                                                                              |                                                                                  |
| R <sub>1</sub>                                                                                                                                                                                                                                                                                                                                                                                                                                                                                                                                                                                                           | Y <sub>2</sub>                                                       |                                                 | L <sub>1</sub>                                                                |                                                                |                                  | E <sub>2</sub> L <sub>2</sub>                                                                | I <sub>1</sub> D <sub>2</sub>                                                    |
| 445                                                                                                                                                                                                                                                                                                                                                                                                                                                                                                                                                                                                                      | 450                                                                  | 455                                             | 460                                                                           | 465                                                            | 470                              | 475                                                                                          | 480                                                                              |
| D <sub>1</sub> V <sub>1</sub> C <sub>1</sub> T <sub>1</sub> E <sub>1</sub> Y <sub>1</sub> S <sub>1</sub> H <sub>1</sub> F <sub>1</sub> M <sub>1</sub> K <sub>1</sub> E <sub>1</sub> L <sub>1</sub> I <sub>1</sub> S <sub>1</sub> E <sub>1</sub> T <sub>1</sub> V <sub>1</sub> N <sub>1</sub> D <sub>1</sub> K <sub>1</sub> S <sub>1</sub> D <sub>1</sub> P <sub>1</sub> D <sub>1</sub> V <sub>1</sub> L <sub>1</sub> R <sub>1</sub> V <sub>1</sub> S <sub>1</sub> N <sub>1</sub> L <sub>1</sub> I <sub>1</sub> S <sub>1</sub> A <sub>1</sub> H <sub>1</sub> F <sub>1</sub> E <sub>1</sub> S <sub>1</sub> V <sub>1</sub>  |                                                                      |                                                 |                                                                               |                                                                |                                  |                                                                                              |                                                                                  |
|                                                                                                                                                                                                                                                                                                                                                                                                                                                                                                                                                                                                                          | I <sub>2</sub><br>A <sub>2</sub>                                     | M <sub>1</sub>                                  | M <sub>2</sub>                                                                | L <sub>1</sub>                                                 | E <sub>1</sub>                   | M <sub>2</sub> M <sub>2</sub> R <sub>2</sub>                                                 |                                                                                  |
| 485                                                                                                                                                                                                                                                                                                                                                                                                                                                                                                                                                                                                                      | 490                                                                  | 495                                             | 500                                                                           | 505                                                            | 510                              | 515                                                                                          | 520                                                                              |
| L <sub>1</sub> E <sub>1</sub> Y <sub>1</sub> N <sub>1</sub> K <sub>1</sub> Y <sub>1</sub> E <sub>1</sub> L <sub>1</sub> M <sub>1</sub> D <sub>1</sub> S <sub>1</sub> M <sub>1</sub> I <sub>1</sub> E <sub>1</sub> K <sub>1</sub> K <sub>1</sub> T <sub>1</sub> Q <sub>1</sub> L <sub>1</sub> E <sub>1</sub> A <sub>1</sub> Q <sub>1</sub> E <sub>1</sub> I <sub>1</sub> M <sub>1</sub> S <sub>1</sub> R <sub>1</sub> E <sub>1</sub> L <sub>1</sub> I <sub>1</sub> K <sub>1</sub> H <sub>1</sub> Q <sub>1</sub> Y <sub>1</sub> G <sub>1</sub> E <sub>1</sub> L <sub>1</sub> F <sub>1</sub> S <sub>1</sub> W <sub>1</sub>  |                                                                      |                                                 |                                                                               |                                                                |                                  |                                                                                              |                                                                                  |
|                                                                                                                                                                                                                                                                                                                                                                                                                                                                                                                                                                                                                          | I <sub>2</sub><br>V <sub>2</sub> M <sub>5</sub><br>I <sub>1</sub>    |                                                 |                                                                               | V <sub>1</sub>                                                 |                                  | S <sub>4</sub>                                                                               | S <sub>1</sub>                                                                   |





|                                                                                                                                                                                                                                                                                                                                                                                                                                                                                                                                                                                                                                                                                                                                                                                                                                                                                                                      |      |      |      |      |      |      |      |
|----------------------------------------------------------------------------------------------------------------------------------------------------------------------------------------------------------------------------------------------------------------------------------------------------------------------------------------------------------------------------------------------------------------------------------------------------------------------------------------------------------------------------------------------------------------------------------------------------------------------------------------------------------------------------------------------------------------------------------------------------------------------------------------------------------------------------------------------------------------------------------------------------------------------|------|------|------|------|------|------|------|
| 1765                                                                                                                                                                                                                                                                                                                                                                                                                                                                                                                                                                                                                                                                                                                                                                                                                                                                                                                 | 1770 | 1775 | 1780 | 1785 | 1790 | 1795 | 1800 |
| E <sub>14</sub> L <sub>14</sub> L <sub>12</sub> N <sub>14</sub> C <sub>12</sub> I <sub>10</sub> S <sub>18</sub> G <sub>12</sub> D <sub>14</sub> I <sub>14</sub> Q <sub>14</sub> M <sub>14</sub> T <sub>14</sub> D <sub>14</sub> F <sub>14</sub> W <sub>14</sub> T <sub>14</sub> F <sub>14</sub> N <sub>14</sub> P <sub>14</sub> D <sub>14</sub> L <sub>14</sub> V <sub>14</sub> E <sub>14</sub> W <sub>14</sub> N <sub>14</sub> S <sub>14</sub> V <sub>14</sub> A <sub>14</sub> S <sub>14</sub> V <sub>14</sub> S <sub>14</sub> T <sub>14</sub> F <sub>14</sub> F <sub>14</sub> P <sub>14</sub> M <sub>14</sub> T <sub>14</sub> K <sub>14</sub> A <sub>14</sub><br>M <sub>2</sub> Y <sub>2</sub> V <sub>4</sub> S <sub>2</sub>                                                                                                                                                                                       |      |      |      |      |      |      |      |
| 1805                                                                                                                                                                                                                                                                                                                                                                                                                                                                                                                                                                                                                                                                                                                                                                                                                                                                                                                 | 1810 | 1815 | 1820 | 1825 | 1830 | 1835 | 1840 |
| I <sub>14</sub> N <sub>14</sub> T <sub>14</sub> I <sub>12</sub> T <sub>14</sub> V <sub>14</sub> Q <sub>14</sub> A <sub>14</sub> N <sub>14</sub> E <sub>14</sub> G <sub>14</sub> E <sub>14</sub> E <sub>14</sub> L <sub>13</sub> I <sub>14</sub> D <sub>14</sub> G <sub>14</sub> N <sub>14</sub> L <sub>14</sub> M <sub>14</sub> I <sub>14</sub> V <sub>14</sub> G <sub>14</sub> Y <sub>14</sub> V <sub>14</sub> N <sub>14</sub> R <sub>14</sub> E <sub>14</sub> V <sub>14</sub> Y <sub>14</sub> H <sub>14</sub> N <sub>14</sub> H <sub>14</sub> V <sub>13</sub> I <sub>14</sub> K <sub>14</sub> G <sub>14</sub> K <sub>12</sub> S <sub>14</sub> E <sub>14</sub><br>M <sub>2</sub> D <sub>3</sub> S <sub>1</sub> M <sub>2</sub> I <sub>1</sub> S <sub>2</sub>                                                                                                                                                         |      |      |      |      |      |      |      |
| 1845                                                                                                                                                                                                                                                                                                                                                                                                                                                                                                                                                                                                                                                                                                                                                                                                                                                                                                                 | 1850 | 1855 | 1860 | 1865 | 1870 | 1875 | 1880 |
| S <sub>14</sub> F <sub>14</sub> M <sub>10</sub> S <sub>13</sub> Y <sub>14</sub> C <sub>14</sub> E <sub>14</sub> Q <sub>14</sub> F <sub>14</sub> P <sub>14</sub> N <sub>12</sub> C <sub>14</sub> A <sub>14</sub> F <sub>14</sub> T <sub>14</sub> K <sub>14</sub> E <sub>12</sub> L <sub>14</sub> R <sub>12</sub> D <sub>14</sub> Q <sub>13</sub> Y <sub>14</sub> L <sub>14</sub> P <sub>14</sub> S <sub>14</sub> I <sub>14</sub> L <sub>14</sub> S <sub>14</sub> K <sub>14</sub> P <sub>14</sub> A <sub>14</sub> F <sub>14</sub> S <sub>14</sub> K <sub>14</sub> G <sub>14</sub> L <sub>14</sub> L <sub>14</sub> K <sub>14</sub> Y <sub>14</sub> N <sub>14</sub><br>T <sub>4</sub> K <sub>1</sub> S <sub>2</sub> D <sub>2</sub> S <sub>2</sub> K <sub>1</sub> V <sub>3</sub>                                                                                                                                          |      |      |      |      |      |      |      |
| 1885                                                                                                                                                                                                                                                                                                                                                                                                                                                                                                                                                                                                                                                                                                                                                                                                                                                                                                                 | 1890 | 1895 | 1900 | 1905 | 1910 | 1915 | 1920 |
| E <sub>14</sub> P <sub>14</sub> V <sub>14</sub> R <sub>13</sub> V <sub>14</sub> G <sub>14</sub> S <sub>10</sub> V <sub>11</sub> N <sub>10</sub> F <sub>14</sub> P <sub>9</sub> C <sub>14</sub> L <sub>14</sub> M <sub>12</sub> R <sub>14</sub> A <sub>14</sub> Y <sub>14</sub> L <sub>14</sub> K <sub>12</sub> V <sub>14</sub> E <sub>14</sub> E <sub>8</sub> M <sub>14</sub> F <sub>14</sub> E <sub>13</sub> N <sub>6</sub> L <sub>14</sub> G <sub>14</sub> F <sub>14</sub> L <sub>12</sub> K <sub>7</sub> E <sub>14</sub> A <sub>14</sub> G <sub>14</sub> P <sub>14</sub> Q <sub>14</sub> W <sub>14</sub> D <sub>14</sub> P <sub>14</sub> I <sub>14</sub><br>Q <sub>1</sub> L <sub>1</sub> M <sub>2</sub> D <sub>4</sub> S <sub>5</sub> I <sub>2</sub> N <sub>2</sub> G <sub>4</sub> K <sub>1</sub> D <sub>4</sub> R <sub>2</sub> E <sub>5</sub><br>L <sub>1</sub> T <sub>2</sub> G <sub>2</sub><br>A <sub>2</sub> |      |      |      |      |      |      |      |
| 1925                                                                                                                                                                                                                                                                                                                                                                                                                                                                                                                                                                                                                                                                                                                                                                                                                                                                                                                 | 1930 | 1935 | 1940 | 1945 | 1950 | 1955 | 1960 |
| E <sub>14</sub> I <sub>14</sub> L <sub>14</sub> E <sub>9</sub> D <sub>14</sub> L <sub>12</sub> N <sub>14</sub> K <sub>14</sub> K <sub>14</sub> A <sub>14</sub> A <sub>14</sub> M <sub>14</sub> G <sub>14</sub> A <sub>14</sub> L <sub>14</sub> Y <sub>14</sub> Q <sub>14</sub> G <sub>14</sub> K <sub>14</sub> K <sub>14</sub> Q <sub>14</sub> D <sub>14</sub> W <sub>14</sub> L <sub>13</sub> K <sub>14</sub> S <sub>14</sub> M <sub>12</sub> E <sub>14</sub> P <sub>14</sub> A <sub>13</sub> D <sub>14</sub> F <sub>14</sub> I <sub>14</sub> T <sub>10</sub> A <sub>14</sub> V <sub>14</sub> R <sub>14</sub> E <sub>14</sub> S <sub>14</sub> F <sub>14</sub><br>D <sub>5</sub> F <sub>1</sub> I <sub>2</sub> V <sub>1</sub> M <sub>4</sub>                                                                                                                                                                         |      |      |      |      |      |      |      |
| 1965                                                                                                                                                                                                                                                                                                                                                                                                                                                                                                                                                                                                                                                                                                                                                                                                                                                                                                                 | 1970 | 1975 | 1980 | 1985 | 1990 | 1995 | 2000 |
| K <sub>14</sub> H <sub>14</sub> L <sub>14</sub> A <sub>14</sub> G <sub>14</sub> G <sub>14</sub> D <sub>14</sub> V <sub>14</sub> G <sub>14</sub> I <sub>14</sub> W <sub>14</sub> S <sub>14</sub> G <sub>14</sub> S <sub>14</sub> L <sub>14</sub> K <sub>14</sub> A <sub>14</sub> E <sub>14</sub> L <sub>14</sub> S <sub>14</sub> P <sub>12</sub> V <sub>12</sub> E <sub>14</sub> K <sub>14</sub> V <sub>14</sub> L <sub>14</sub> E <sub>14</sub> Q <sub>14</sub> K <sub>14</sub> T <sub>14</sub> S <sub>12</sub> V <sub>14</sub> F <sub>14</sub> T <sub>14</sub> G <sub>14</sub> A <sub>14</sub> P <sub>14</sub> I <sub>14</sub> D <sub>14</sub> L <sub>14</sub><br>T <sub>1</sub> I <sub>2</sub> K <sub>4</sub> R <sub>2</sub><br>S <sub>1</sub>                                                                                                                                                                     |      |      |      |      |      |      |      |
| 2005                                                                                                                                                                                                                                                                                                                                                                                                                                                                                                                                                                                                                                                                                                                                                                                                                                                                                                                 | 2010 | 2015 | 2020 | 2025 | 2030 | 2035 | 2040 |
| L <sub>14</sub> L <sub>14</sub> G <sub>14</sub> K <sub>14</sub> I <sub>12</sub> L <sub>14</sub> V <sub>14</sub> D <sub>14</sub> N <sub>14</sub> F <sub>14</sub> N <sub>14</sub> H <sub>14</sub> F <sub>14</sub> F <sub>14</sub> Y <sub>14</sub> F <sub>14</sub> N <sub>14</sub> H <sub>14</sub> L <sub>14</sub> K <sub>14</sub> G <sub>14</sub> P <sub>14</sub> W <sub>14</sub> T <sub>14</sub> V <sub>14</sub> G <sub>14</sub> I <sub>14</sub> N <sub>14</sub> K <sub>14</sub> F <sub>14</sub> N <sub>14</sub> K <sub>14</sub> G <sub>14</sub> W <sub>14</sub> D <sub>14</sub> S <sub>14</sub> L <sub>14</sub> A <sub>14</sub> S <sub>12</sub><br>M <sub>2</sub> K <sub>2</sub>                                                                                                                                                                                                                                     |      |      |      |      |      |      |      |
| 2045                                                                                                                                                                                                                                                                                                                                                                                                                                                                                                                                                                                                                                                                                                                                                                                                                                                                                                                 | 2050 | 2055 | 2060 | 2065 | 2070 | 2075 | 2080 |
| Y <sub>13</sub> F <sub>14</sub> N <sub>12</sub> H <sub>14</sub> S <sub>12</sub> W <sub>14</sub> N <sub>14</sub> F <sub>14</sub> M <sub>13</sub> D <sub>14</sub> C <sub>14</sub> D <sub>14</sub> G <sub>14</sub> S <sub>14</sub> S <sub>14</sub> F <sub>14</sub> D <sub>14</sub> T <sub>14</sub> S <sub>14</sub> L <sub>14</sub> A <sub>14</sub> P <sub>14</sub> I <sub>14</sub> L <sub>14</sub> F <sub>14</sub> Q <sub>14</sub> L <sub>14</sub> V <sub>14</sub> C <sub>14</sub> H <sub>14</sub> M <sub>14</sub> R <sub>14</sub> E <sub>14</sub> K <sub>14</sub> F <sub>14</sub> G <sub>14</sub> N <sub>14</sub> F <sub>14</sub> D <sub>14</sub> D <sub>14</sub><br>N <sub>1</sub> D <sub>2</sub> N <sub>2</sub> T <sub>1</sub>                                                                                                                                                                                       |      |      |      |      |      |      |      |
| 2085                                                                                                                                                                                                                                                                                                                                                                                                                                                                                                                                                                                                                                                                                                                                                                                                                                                                                                                 | 2090 | 2095 | 2100 | 2105 | 2110 | 2115 | 2120 |
| I <sub>14</sub> E <sub>14</sub> S <sub>14</sub> A <sub>14</sub> A <sub>14</sub> L <sub>14</sub> R <sub>14</sub> N <sub>14</sub> L <sub>14</sub> Y <sub>14</sub> T <sub>14</sub> Q <sub>14</sub> M <sub>14</sub> V <sub>14</sub> Y <sub>14</sub> T <sub>14</sub> P <sub>14</sub> I <sub>14</sub> L <sub>14</sub> T <sub>14</sub> I <sub>14</sub> D <sub>14</sub> G <sub>14</sub> Y <sub>14</sub> T <sub>14</sub> T <sub>8</sub> K <sub>14</sub> K <sub>14</sub> H <sub>14</sub> R <sub>14</sub> G <sub>14</sub> N <sub>14</sub> N <sub>14</sub> S <sub>14</sub> G <sub>14</sub> Q <sub>14</sub> P <sub>14</sub> S <sub>14</sub> T <sub>14</sub> V <sub>14</sub><br>V <sub>1</sub> K <sub>2</sub> T <sub>2</sub> A <sub>4</sub> M <sub>1</sub> V <sub>1</sub>                                                                                                                                                          |      |      |      |      |      |      |      |
| 2125                                                                                                                                                                                                                                                                                                                                                                                                                                                                                                                                                                                                                                                                                                                                                                                                                                                                                                                 | 2130 | 2135 | 2140 | 2145 | 2150 | 2155 | 2160 |
| V <sub>14</sub> D <sub>14</sub> N <sub>14</sub> T <sub>14</sub> I <sub>12</sub> M <sub>14</sub> L <sub>14</sub> M <sub>14</sub> I <sub>14</sub> V <sub>14</sub> V <sub>14</sub> E <sub>14</sub> Y <sub>14</sub> C <sub>14</sub> K <sub>14</sub> A <sub>14</sub> V <sub>14</sub> M <sub>14</sub> E <sub>14</sub> S <sub>12</sub> E <sub>14</sub> G <sub>14</sub> S <sub>14</sub> T <sub>4</sub> M <sub>14</sub> Q <sub>14</sub> F <sub>14</sub> K <sub>14</sub> Y <sub>14</sub> M <sub>14</sub> C <sub>14</sub> N <sub>14</sub> G <sub>14</sub> D <sub>14</sub> D <sub>14</sub> L <sub>14</sub> I <sub>12</sub> L <sub>14</sub> N <sub>14</sub> V <sub>14</sub><br>M <sub>2</sub> I <sub>3</sub> T <sub>2</sub> K <sub>1</sub> V <sub>4</sub> I <sub>2</sub> E <sub>2</sub> A <sub>2</sub> M <sub>2</sub>                                                                                                             |      |      |      |      |      |      |      |
| 2165                                                                                                                                                                                                                                                                                                                                                                                                                                                                                                                                                                                                                                                                                                                                                                                                                                                                                                                 | 2170 | 2175 | 2180 | 2185 | 2190 | 2195 | 2200 |
| P <sub>14</sub> D <sub>12</sub> D <sub>14</sub> E <sub>14</sub> V <sub>14</sub> S <sub>12</sub> M <sub>14</sub> I <sub>14</sub> Q <sub>14</sub> S <sub>14</sub> S <sub>14</sub> F <sub>14</sub> S <sub>14</sub> E <sub>14</sub> L <sub>14</sub> F <sub>14</sub> S <sub>14</sub> E <sub>14</sub> C <sub>14</sub> G <sub>14</sub> L <sub>14</sub> D <sub>14</sub> Y <sub>14</sub> N <sub>12</sub> F <sub>14</sub> D <sub>14</sub> D <sub>14</sub> V <sub>14</sub> H <sub>14</sub> K <sub>14</sub> S <sub>14</sub> M <sub>14</sub> E <sub>14</sub> T <sub>14</sub> I <sub>14</sub> E <sub>14</sub> Y <sub>14</sub> M <sub>14</sub> S <sub>14</sub> H <sub>14</sub><br>N <sub>2</sub> N <sub>2</sub> V <sub>1</sub> D <sub>2</sub> T <sub>1</sub>                                                                                                                                                                        |      |      |      |      |      |      |      |
| 2205                                                                                                                                                                                                                                                                                                                                                                                                                                                                                                                                                                                                                                                                                                                                                                                                                                                                                                                 | 2210 | 2215 | 2220 | 2225 | 2230 | 2235 | 2240 |
| S <sub>14</sub> F <sub>14</sub> M <sub>14</sub> L <sub>13</sub> K <sub>14</sub> D <sub>14</sub> G <sub>10</sub> V <sub>12</sub> Y <sub>14</sub> I <sub>14</sub> P <sub>14</sub> K <sub>14</sub> L <sub>14</sub> K <sub>14</sub> K <sub>12</sub> E <sub>14</sub> S <sub>14</sub> I <sub>14</sub> V <sub>14</sub> A <sub>14</sub> I <sub>14</sub> L <sub>13</sub> E <sub>14</sub> W <sub>14</sub> E <sub>14</sub> S <sub>14</sub> G <sub>14</sub> D <sub>14</sub> E <sub>14</sub> I <sub>10</sub> M <sub>14</sub> R <sub>12</sub> T <sub>14</sub> R <sub>12</sub> S <sub>14</sub> A <sub>14</sub> L <sub>14</sub> N <sub>14</sub> A <sub>14</sub> A <sub>14</sub><br>M <sub>1</sub> D <sub>4</sub> L <sub>1</sub> S <sub>2</sub> V <sub>1</sub> M <sub>4</sub> S <sub>2</sub> S <sub>2</sub>                                                                                                                           |      |      |      |      |      |      |      |
| 2245                                                                                                                                                                                                                                                                                                                                                                                                                                                                                                                                                                                                                                                                                                                                                                                                                                                                                                                 | 2250 | 2255 | 2260 | 2265 | 2270 | 2275 | 2280 |
| Y <sub>14</sub> I <sub>14</sub> E <sub>14</sub> S <sub>14</sub> Y <sub>14</sub> G <sub>14</sub> Y <sub>14</sub> E <sub>8</sub> D <sub>14</sub> L <sub>13</sub> M <sub>14</sub> V <sub>14</sub> E <sub>14</sub> I <sub>14</sub> E <sub>14</sub> R <sub>14</sub> Y <sub>14</sub> A <sub>14</sub> V <sub>14</sub> F <sub>14</sub> W <sub>14</sub> A <sub>14</sub> T <sub>8</sub> E <sub>13</sub> K <sub>14</sub> G <sub>14</sub> C <sub>14</sub> E <sub>14</sub> Y <sub>14</sub> P <sub>14</sub> L <sub>14</sub> L <sub>14</sub> D <sub>14</sub> S <sub>14</sub> K <sub>14</sub> R <sub>14</sub> V <sub>14</sub> E <sub>14</sub> G <sub>14</sub> L <sub>14</sub><br>D <sub>6</sub> P <sub>1</sub> I <sub>1</sub> T <sub>1</sub> M <sub>1</sub> A <sub>6</sub> G <sub>1</sub>                                                                                                                                            |      |      |      |      |      |      |      |

|                                                                                                                                                                                                                                                                                                                                                                                                                                                                                                                                                                                                                                                                 |                                                                                  |                                                                      |                                              |                               |                                              |                                                                                                          |                                                                                                                                                                      |
|-----------------------------------------------------------------------------------------------------------------------------------------------------------------------------------------------------------------------------------------------------------------------------------------------------------------------------------------------------------------------------------------------------------------------------------------------------------------------------------------------------------------------------------------------------------------------------------------------------------------------------------------------------------------|----------------------------------------------------------------------------------|----------------------------------------------------------------------|----------------------------------------------|-------------------------------|----------------------------------------------|----------------------------------------------------------------------------------------------------------|----------------------------------------------------------------------------------------------------------------------------------------------------------------------|
| 2285                                                                                                                                                                                                                                                                                                                                                                                                                                                                                                                                                                                                                                                            | 2290                                                                             | 2295                                                                 | 2300                                         | 2305                          | 2310                                         | 2315                                                                                                     | 2320                                                                                                                                                                 |
| Y <sub>14</sub> K <sub>10</sub> D <sub>14</sub> D <sub>14</sub> H <sub>11</sub> T <sub>14</sub> D <sub>14</sub> L <sub>11</sub> N <sub>14</sub> E <sub>14</sub> E <sub>14</sub> W <sub>14</sub> L <sub>14</sub> M <sub>6</sub> G <sub>14</sub> I <sub>14</sub> L <sub>14</sub> P <sub>14</sub> P <sub>14</sub> S <sub>14</sub> F <sub>14</sub> E <sub>14</sub> H <sub>14</sub> C <sub>14</sub> Y <sub>14</sub> V <sub>14</sub> D <sub>14</sub> T <sub>10</sub> Q <sub>14</sub> T <sub>13</sub> K <sub>12</sub> D <sub>14</sub> L <sub>12</sub> S <sub>13</sub> G <sub>8</sub> S <sub>9</sub> E <sub>12</sub> K <sub>10</sub> P <sub>12</sub> E <sub>14</sub>    |                                                                                  |                                                                      |                                              |                               |                                              |                                                                                                          |                                                                                                                                                                      |
| S <sub>4</sub>                                                                                                                                                                                                                                                                                                                                                                                                                                                                                                                                                                                                                                                  | Y <sub>2</sub><br>N <sub>1</sub>                                                 | V <sub>3</sub><br>I <sub>2</sub><br>S <sub>2</sub><br>T <sub>1</sub> |                                              |                               | M <sub>4</sub> I <sub>1</sub> E <sub>2</sub> | V <sub>2</sub> K <sub>1</sub> E <sub>4</sub> G <sub>2</sub> D <sub>2</sub> Q <sub>2</sub> L <sub>2</sub> | S <sub>2</sub> E <sub>2</sub> E <sub>2</sub><br>K <sub>1</sub>                                                                                                       |
| 2325                                                                                                                                                                                                                                                                                                                                                                                                                                                                                                                                                                                                                                                            | 2330                                                                             | 2335                                                                 | 2340                                         | 2345                          | 2350                                         | 2355                                                                                                     | 2360                                                                                                                                                                 |
| L <sub>13</sub> S <sub>13</sub> I <sub>5</sub> E <sub>12</sub> S <sub>13</sub> H <sub>13</sub> D <sub>13</sub> G <sub>11</sub> V <sub>6</sub> P <sub>5</sub> Q <sub>11</sub> M <sub>13</sub> Q <sub>14</sub> M <sub>14</sub> K <sub>14</sub> F <sub>14</sub> P <sub>14</sub> V <sub>14</sub> T <sub>14</sub> F <sub>14</sub> V <sub>14</sub> T <sub>14</sub> G <sub>14</sub> N <sub>14</sub> L <sub>12</sub> G <sub>14</sub> K <sub>14</sub> L <sub>14</sub> A <sub>14</sub> E <sub>14</sub> V <sub>14</sub> K <sub>13</sub> S <sub>14</sub> L <sub>14</sub> L <sub>14</sub> G <sub>14</sub> I <sub>14</sub> A <sub>13</sub> N <sub>11</sub> D <sub>14</sub>    |                                                                                  |                                                                      |                                              |                               |                                              |                                                                                                          |                                                                                                                                                                      |
| F <sub>1</sub> G <sub>1</sub> V <sub>3</sub> G <sub>2</sub> N <sub>1</sub> C <sub>2</sub> N <sub>1</sub> S <sub>3</sub> T <sub>6</sub> S <sub>5</sub> R <sub>3</sub> L <sub>1</sub>                                                                                                                                                                                                                                                                                                                                                                                                                                                                             |                                                                                  |                                                                      |                                              | F <sub>2</sub>                | S <sub>1</sub>                               |                                                                                                          | S <sub>1</sub> S <sub>3</sub>                                                                                                                                        |
| T <sub>3</sub><br>P <sub>2</sub><br>A <sub>1</sub>                                                                                                                                                                                                                                                                                                                                                                                                                                                                                                                                                                                                              | Y <sub>2</sub><br>A <sub>1</sub> L <sub>2</sub><br>M <sub>1</sub> T <sub>2</sub> |                                                                      |                                              |                               |                                              |                                                                                                          |                                                                                                                                                                      |
| 2365                                                                                                                                                                                                                                                                                                                                                                                                                                                                                                                                                                                                                                                            | 2370                                                                             | 2375                                                                 | 2380                                         | 2385                          | 2390                                         | 2395                                                                                                     | 2400                                                                                                                                                                 |
| V <sub>14</sub> M <sub>9</sub> A <sub>14</sub> K <sub>8</sub> N <sub>14</sub> I <sub>14</sub> D <sub>14</sub> L <sub>14</sub> P <sub>14</sub> E <sub>14</sub> V <sub>14</sub> Q <sub>14</sub> G <sub>14</sub> T <sub>14</sub> P <sub>14</sub> D <sub>13</sub> E <sub>14</sub> I <sub>13</sub> V <sub>13</sub> S <sub>11</sub> K <sub>14</sub> K <sub>14</sub> A <sub>14</sub> Q <sub>14</sub> L <sub>13</sub> A <sub>14</sub> V <sub>14</sub> K <sub>14</sub> M <sub>14</sub> T <sub>14</sub> N <sub>14</sub> S <sub>12</sub> P <sub>14</sub> V <sub>14</sub> L <sub>14</sub> V <sub>14</sub> E <sub>14</sub> D <sub>14</sub> T <sub>13</sub> C <sub>14</sub>   |                                                                                  |                                                                      |                                              |                               |                                              |                                                                                                          |                                                                                                                                                                      |
| V <sub>5</sub> S <sub>5</sub>                                                                                                                                                                                                                                                                                                                                                                                                                                                                                                                                                                                                                                   |                                                                                  | E <sub>2</sub>                                                       | V <sub>1</sub> A <sub>1</sub> K <sub>2</sub> | F <sub>1</sub>                |                                              | G <sub>2</sub>                                                                                           | A <sub>1</sub>                                                                                                                                                       |
| R <sub>1</sub>                                                                                                                                                                                                                                                                                                                                                                                                                                                                                                                                                                                                                                                  |                                                                                  | V <sub>1</sub>                                                       | M <sub>1</sub>                               |                               |                                              |                                                                                                          |                                                                                                                                                                      |
| 2405                                                                                                                                                                                                                                                                                                                                                                                                                                                                                                                                                                                                                                                            | 2410                                                                             | 2415                                                                 | 2420                                         | 2425                          | 2430                                         | 2435                                                                                                     | 2440                                                                                                                                                                 |
| L <sub>14</sub> C <sub>14</sub> F <sub>14</sub> N <sub>14</sub> A <sub>14</sub> F <sub>14</sub> N <sub>14</sub> G <sub>14</sub> L <sub>14</sub> P <sub>14</sub> G <sub>14</sub> P <sub>14</sub> Y <sub>14</sub> I <sub>13</sub> K <sub>14</sub> W <sub>14</sub> F <sub>14</sub> L <sub>14</sub> K <sub>14</sub> E <sub>14</sub> L <sub>14</sub> G <sub>14</sub> L <sub>14</sub> E <sub>8</sub> G <sub>14</sub> V <sub>14</sub> V <sub>14</sub> K <sub>12</sub> M <sub>14</sub> L <sub>14</sub> S <sub>14</sub> A <sub>14</sub> F <sub>14</sub> G <sub>14</sub> D <sub>14</sub> K <sub>14</sub> S <sub>14</sub> A <sub>14</sub> Y <sub>14</sub> A <sub>14</sub>  |                                                                                  |                                                                      |                                              |                               |                                              |                                                                                                          |                                                                                                                                                                      |
|                                                                                                                                                                                                                                                                                                                                                                                                                                                                                                                                                                                                                                                                 |                                                                                  | M <sub>1</sub>                                                       |                                              | D <sub>6</sub>                | S <sub>2</sub>                               | E <sub>4</sub><br>S <sub>2</sub>                                                                         |                                                                                                                                                                      |
| 2445                                                                                                                                                                                                                                                                                                                                                                                                                                                                                                                                                                                                                                                            | 2450                                                                             | 2455                                                                 | 2460                                         | 2465                          | 2470                                         | 2475                                                                                                     | 2480                                                                                                                                                                 |
| L <sub>14</sub> C <sub>14</sub> T <sub>14</sub> F <sub>14</sub> A <sub>14</sub> Y <sub>14</sub> V <sub>13</sub> H <sub>13</sub> N <sub>14</sub> E <sub>14</sub> L <sub>7</sub> S <sub>14</sub> D <sub>13</sub> P <sub>14</sub> I <sub>11</sub> V <sub>14</sub> F <sub>14</sub> K <sub>14</sub> G <sub>14</sub> V <sub>14</sub> V <sub>14</sub> N <sub>13</sub> G <sub>14</sub> E <sub>14</sub> I <sub>14</sub> V <sub>14</sub> P <sub>14</sub> P <sub>14</sub> R <sub>14</sub> G <sub>14</sub> N <sub>12</sub> N <sub>14</sub> G <sub>14</sub> F <sub>14</sub> G <sub>14</sub> W <sub>14</sub> D <sub>14</sub> P <sub>14</sub> M <sub>9</sub> F <sub>14</sub>   |                                                                                  |                                                                      |                                              |                               |                                              |                                                                                                          |                                                                                                                                                                      |
|                                                                                                                                                                                                                                                                                                                                                                                                                                                                                                                                                                                                                                                                 | A <sub>1</sub> S <sub>1</sub> S <sub>7</sub>                                     | E <sub>1</sub>                                                       | V <sub>3</sub>                               | K <sub>1</sub>                |                                              | K <sub>2</sub>                                                                                           | I <sub>5</sub>                                                                                                                                                       |
| 2485                                                                                                                                                                                                                                                                                                                                                                                                                                                                                                                                                                                                                                                            | 2490                                                                             | 2495                                                                 | 2500                                         | 2505                          | 2510                                         | 2515                                                                                                     | 2520                                                                                                                                                                 |
| K <sub>14</sub> P <sub>14</sub> D <sub>14</sub> G <sub>9</sub> C <sub>14</sub> G <sub>14</sub> C <sub>14</sub> T <sub>14</sub> F <sub>14</sub> A <sub>14</sub> E <sub>14</sub> M <sub>14</sub> P <sub>9</sub> S <sub>14</sub> S <sub>11</sub> I <sub>13</sub> K <sub>14</sub> N <sub>14</sub> D <sub>13</sub> F <sub>14</sub> S <sub>14</sub> H <sub>14</sub> S <sub>14</sub> S <sub>14</sub> A <sub>14</sub> L <sub>14</sub> E <sub>14</sub> K <sub>14</sub> V <sub>14</sub> K <sub>14</sub> L <sub>14</sub> F <sub>14</sub> L <sub>14</sub> D <sub>14</sub> N <sub>14</sub> L <sub>14</sub> V <sub>10</sub> V <sub>14</sub> K <sub>12</sub>                   |                                                                                  |                                                                      |                                              |                               |                                              |                                                                                                          |                                                                                                                                                                      |
| E <sub>5</sub> S <sub>5</sub>                                                                                                                                                                                                                                                                                                                                                                                                                                                                                                                                                                                                                                   |                                                                                  | S <sub>5</sub> N <sub>2</sub> M <sub>3</sub>                         | E <sub>1</sub>                               | K <sub>1</sub>                |                                              | S <sub>3</sub> Y <sub>4</sub>                                                                            | M <sub>4</sub> S <sub>2</sub>                                                                                                                                        |
| E <sub>1</sub>                                                                                                                                                                                                                                                                                                                                                                                                                                                                                                                                                                                                                                                  |                                                                                  | G <sub>1</sub> N <sub>1</sub>                                        |                                              |                               |                                              |                                                                                                          |                                                                                                                                                                      |
| 2525                                                                                                                                                                                                                                                                                                                                                                                                                                                                                                                                                                                                                                                            | 2530                                                                             | 2535                                                                 | 2540                                         | 2545                          | 2550                                         | 2555                                                                                                     | 2560                                                                                                                                                                 |
| Q <sub>14</sub> E <sub>14</sub> E <sub>12</sub> K <sub>12</sub> K <sub>14</sub> A <sub>14</sub> K <sub>7</sub> V <sub>14</sub> A <sub>14</sub> L <sub>14</sub> T <sub>14</sub> I <sub>14</sub> D <sub>12</sub> V <sub>14</sub> Q <sub>14</sub> A <sub>13</sub> L <sub>13</sub> N <sub>12</sub> Q <sub>14</sub> E <sub>14</sub> E <sub>14</sub> M <sub>9</sub> E <sub>14</sub> A <sub>12</sub> E <sub>14</sub> I <sub>14</sub> T <sub>12</sub> A <sub>14</sub> L <sub>14</sub> K <sub>14</sub> K <sub>14</sub> L <sub>13</sub> W <sub>14</sub> K <sub>9</sub> D <sub>14</sub> N <sub>14</sub> G <sub>14</sub> P <sub>14</sub> T <sub>14</sub> S <sub>13</sub>    |                                                                                  |                                                                      |                                              |                               |                                              |                                                                                                          |                                                                                                                                                                      |
| K <sub>2</sub> Q <sub>1</sub> S <sub>3</sub> T <sub>1</sub> S <sub>5</sub> M <sub>1</sub>                                                                                                                                                                                                                                                                                                                                                                                                                                                                                                                                                                       |                                                                                  | E <sub>2</sub>                                                       | V <sub>1</sub> D <sub>2</sub>                | V <sub>4</sub> E <sub>1</sub> | A <sub>1</sub>                               | M <sub>1</sub> S <sub>5</sub>                                                                            | G <sub>1</sub>                                                                                                                                                       |
| N <sub>1</sub> G <sub>1</sub>                                                                                                                                                                                                                                                                                                                                                                                                                                                                                                                                                                                                                                   |                                                                                  |                                                                      |                                              | I <sub>1</sub> T <sub>1</sub> | S <sub>1</sub>                               |                                                                                                          |                                                                                                                                                                      |
| 2565                                                                                                                                                                                                                                                                                                                                                                                                                                                                                                                                                                                                                                                            | 2570                                                                             | 2575                                                                 | 2580                                         | 2585                          | 2590                                         | 2595                                                                                                     | 2600                                                                                                                                                                 |
| T <sub>14</sub> R <sub>14</sub> S <sub>14</sub> P <sub>12</sub> F <sub>14</sub> E <sub>14</sub> A <sub>14</sub> S <sub>13</sub> S <sub>14</sub> L <sub>14</sub> S <sub>14</sub> A <sub>14</sub> P <sub>12</sub> Q <sub>14</sub> V <sub>14</sub> E <sub>14</sub> R <sub>14</sub> V <sub>14</sub> N <sub>14</sub> E <sub>14</sub> L <sub>14</sub> L <sub>14</sub> Q <sub>14</sub> K <sub>12</sub> L <sub>14</sub> K <sub>14</sub> D <sub>13</sub> E <sub>14</sub> G <sub>14</sub> L <sub>14</sub> Q <sub>14</sub> T <sub>14</sub> K <sub>14</sub> K <sub>14</sub> S <sub>14</sub> P <sub>14</sub> C <sub>14</sub> G <sub>14</sub> E <sub>14</sub> P <sub>14</sub> |                                                                                  |                                                                      |                                              |                               |                                              |                                                                                                          |                                                                                                                                                                      |
| S <sub>2</sub>                                                                                                                                                                                                                                                                                                                                                                                                                                                                                                                                                                                                                                                  | K <sub>1</sub>                                                                   | S <sub>2</sub>                                                       |                                              | Q <sub>2</sub>                | N <sub>1</sub>                               |                                                                                                          |                                                                                                                                                                      |
| 2605                                                                                                                                                                                                                                                                                                                                                                                                                                                                                                                                                                                                                                                            | 2610                                                                             | 2615                                                                 | 2620                                         | 2625                          | 2630                                         | 2635                                                                                                     | 2640                                                                                                                                                                 |
| D <sub>14</sub> D <sub>14</sub> G <sub>14</sub> E <sub>14</sub> V <sub>13</sub> V <sub>13</sub> D <sub>13</sub> D <sub>14</sub> D <sub>14</sub> S <sub>14</sub> D <sub>12</sub> D <sub>13</sub> G <sub>12</sub> N <sub>11</sub> N <sub>12</sub> Q <sub>14</sub> S <sub>14</sub> S <sub>13</sub> G <sub>12</sub> K <sub>14</sub> E <sub>12</sub> V <sub>12</sub> V <sub>8</sub> D <sub>12</sub> E <sub>14</sub> S <sub>11</sub> Q <sub>14</sub> N <sub>13</sub> N <sub>10</sub> Q <sub>12</sub> Q <sub>13</sub> P <sub>12</sub> S <sub>12</sub> K <sub>13</sub> P <sub>10</sub> K <sub>13</sub> F <sub>13</sub> K <sub>14</sub> I <sub>13</sub> S <sub>14</sub>  |                                                                                  |                                                                      |                                              |                               |                                              |                                                                                                          |                                                                                                                                                                      |
| M <sub>1</sub> M <sub>1</sub> V <sub>1</sub>                                                                                                                                                                                                                                                                                                                                                                                                                                                                                                                                                                                                                    | N <sub>2</sub> N <sub>1</sub> D <sub>1</sub> D <sub>3</sub>                      | K <sub>1</sub>                                                       | F <sub>1</sub> E <sub>2</sub>                | K <sub>2</sub>                | I <sub>4</sub> H <sub>1</sub>                | N <sub>2</sub>                                                                                           | D <sub>1</sub> D <sub>4</sub> K <sub>2</sub> H <sub>1</sub> L <sub>1</sub> K <sub>2</sub> S <sub>1</sub> S <sub>2</sub> S <sub>1</sub> L <sub>1</sub> V <sub>2</sub> |
|                                                                                                                                                                                                                                                                                                                                                                                                                                                                                                                                                                                                                                                                 | E <sub>1</sub> D <sub>1</sub>                                                    |                                                                      |                                              |                               | N <sub>1</sub> G <sub>1</sub>                |                                                                                                          | S <sub>1</sub> L <sub>1</sub><br>Q <sub>1</sub>                                                                                                                      |
| 2645                                                                                                                                                                                                                                                                                                                                                                                                                                                                                                                                                                                                                                                            | 2650                                                                             | 2655                                                                 | 2660                                         | 2665                          | 2670                                         | 2675                                                                                                     | 2680                                                                                                                                                                 |
| G <sub>14</sub> D <sub>14</sub> G <sub>13</sub> S <sub>11</sub> A <sub>10</sub> I <sub>9</sub> S <sub>12</sub> R <sub>14</sub> D <sub>14</sub> D <sub>14</sub> I <sub>14</sub> D <sub>14</sub> K <sub>13</sub> I <sub>13</sub> P <sub>14</sub> T <sub>14</sub> N <sub>13</sub> A <sub>14</sub> L <sub>13</sub> E <sub>14</sub> I <sub>13</sub> K <sub>14</sub> K <sub>14</sub> T <sub>14</sub> F <sub>14</sub> K <sub>14</sub> P <sub>14</sub> P <sub>14</sub> K <sub>10</sub> V <sub>14</sub> S <sub>14</sub> Q <sub>14</sub> S <sub>14</sub> A <sub>14</sub> Y <sub>14</sub> I <sub>14</sub> W <sub>14</sub> I <sub>13</sub> P <sub>14</sub> R <sub>14</sub>  |                                                                                  |                                                                      |                                              |                               |                                              |                                                                                                          |                                                                                                                                                                      |
| E <sub>1</sub> N <sub>3</sub> T <sub>4</sub> V <sub>5</sub> K <sub>2</sub>                                                                                                                                                                                                                                                                                                                                                                                                                                                                                                                                                                                      |                                                                                  | S <sub>1</sub>                                                       | S <sub>1</sub>                               |                               | S <sub>4</sub>                               |                                                                                                          |                                                                                                                                                                      |
| 2685                                                                                                                                                                                                                                                                                                                                                                                                                                                                                                                                                                                                                                                            | 2690                                                                             | 2695                                                                 | 2700                                         | 2705                          | 2710                                         | 2715                                                                                                     | 2720                                                                                                                                                                 |
| S <sub>14</sub> Q <sub>14</sub> S <sub>14</sub> D <sub>14</sub> N <sub>14</sub> L <sub>14</sub> T <sub>14</sub> P <sub>14</sub> D <sub>14</sub> V <sub>14</sub> I <sub>13</sub> Q <sub>14</sub> N <sub>13</sub> F <sub>14</sub> L <sub>14</sub> A <sub>14</sub> Y <sub>14</sub> M <sub>10</sub> P <sub>14</sub> P <sub>14</sub> S <sub>14</sub> H <sub>13</sub> A <sub>14</sub> M <sub>14</sub> D <sub>14</sub> N <sub>14</sub> Q <sub>14</sub> L <sub>13</sub> A <sub>14</sub> S <sub>14</sub> G <sub>14</sub> I <sub>13</sub> E <sub>14</sub> V <sub>14</sub> E <sub>14</sub> N <sub>14</sub> W <sub>14</sub> A <sub>14</sub> I <sub>13</sub> E <sub>14</sub> |                                                                                  |                                                                      |                                              |                               |                                              |                                                                                                          |                                                                                                                                                                      |
|                                                                                                                                                                                                                                                                                                                                                                                                                                                                                                                                                                                                                                                                 | M <sub>1</sub> S <sub>1</sub>                                                    |                                                                      | V <sub>4</sub>                               | Y <sub>1</sub>                |                                              | V <sub>1</sub>                                                                                           | V <sub>2</sub><br>M <sub>1</sub>                                                                                                                                     |
| 2725                                                                                                                                                                                                                                                                                                                                                                                                                                                                                                                                                                                                                                                            | 2730                                                                             | 2735                                                                 | 2740                                         | 2745                          | 2750                                         | 2755                                                                                                     | 2760                                                                                                                                                                 |
| V <sub>14</sub> A <sub>14</sub> K <sub>14</sub> A <sub>14</sub> Y <sub>14</sub> G <sub>14</sub> V <sub>14</sub> N <sub>14</sub> M <sub>14</sub> Q <sub>14</sub> E <sub>14</sub> F <sub>14</sub> Y <sub>14</sub> R <sub>13</sub> T <sub>14</sub> V <sub>10</sub> L <sub>13</sub> P <sub>14</sub> A <sub>14</sub> W <sub>14</sub> M <sub>10</sub> V <sub>14</sub> N <sub>14</sub> C <sub>14</sub> M <sub>14</sub> V <sub>14</sub> N <sub>14</sub> G <sub>14</sub> T <sub>14</sub> S <sub>10</sub> D <sub>14</sub> E <sub>14</sub> S <sub>14</sub> K <sub>14</sub> N <sub>14</sub> E <sub>14</sub> K <sub>14</sub> S <sub>14</sub> W <sub>14</sub> R <sub>14</sub> |                                                                                  |                                                                      |                                              |                               |                                              |                                                                                                          |                                                                                                                                                                      |
|                                                                                                                                                                                                                                                                                                                                                                                                                                                                                                                                                                                                                                                                 |                                                                                  | H <sub>1</sub> I <sub>1</sub>                                        |                                              | I <sub>4</sub>                |                                              |                                                                                                          |                                                                                                                                                                      |
| 2765                                                                                                                                                                                                                                                                                                                                                                                                                                                                                                                                                                                                                                                            | 2770                                                                             | 2775                                                                 | 2780                                         | 2785                          | 2790                                         | 2795                                                                                                     | 2800                                                                                                                                                                 |
| A <sub>14</sub> V <sub>14</sub> E <sub>14</sub> L <sub>14</sub> N <sub>14</sub> S <sub>14</sub> Q <sub>14</sub> G <sub>14</sub> E <sub>14</sub> D <sub>14</sub> V <sub>14</sub> D <sub>14</sub> D <sub>14</sub> F <sub>14</sub> E <sub>14</sub> Y <sub>14</sub> P <sub>14</sub> M <sub>14</sub> E <sub>14</sub> P <sub>14</sub> M <sub>14</sub> Y <sub>14</sub> K <sub>13</sub> F <sub>14</sub> A <sub>14</sub> L <sub>14</sub> P <sub>14</sub> T <sub>14</sub> M <sub>14</sub> S <sub>14</sub> K <sub>14</sub> V <sub>14</sub> M <sub>14</sub> S <sub>14</sub> N <sub>14</sub> F <sub>14</sub> S <sub>14</sub> S <sub>14</sub> Q <sub>14</sub> A <sub>14</sub> |                                                                                  |                                                                      |                                              |                               |                                              |                                                                                                          |                                                                                                                                                                      |
|                                                                                                                                                                                                                                                                                                                                                                                                                                                                                                                                                                                                                                                                 |                                                                                  |                                                                      |                                              | S <sub>1</sub>                |                                              | I <sub>3</sub>                                                                                           |                                                                                                                                                                      |
